# Supplementary material for: Improving the quality of life of patients with breast cancer-related lymphoedema by lymphaticovenous anastomosis (LVA): study protocol of a multicentre randomised controlled trial
Source: PubMed Central journal article supplement — BMJ Open. 2020 Jan 15;10(1):e035337. doi: 10.1136/bmjopen-2019-035337 (PMC7045191; doi:10.1136/bmjopen-2019-035337), 2020-01-15
Supplement: bmjopen-2019-035337.draft_revisions.pdf [file bmjopen-2019-035337.draft_revisions.pdf]

# BMJ Open

BMJ Open is committed to open peer review. As part of this commitment we make the peer review history of every article we publish publicly available.

When an article is published we post the peer reviewers' comments and the authors' responses online. We also post the versions of the paper that were used during peer review. These are the versions that the peer review comments apply to.

The versions of the paper that follow are the versions that were submitted during the peer review process. They are not the versions of record or the final published versions. They should not be cited or distributed as the published version of this manuscript.

BMJ Open is an open access journal and the full, final, typeset and author-corrected version of record of the manuscript is available on our site with no access controls, subscription charges or pay-per-view fees (<http://bmjopen.bmj.com>).

If you have any questions on BMJ Open's open peer review process please email [info.bmjopen@bmj.com](mailto:info.bmjopen@bmj.com)

# BMJ Open

## Improving the quality of life of patients with breast cancer-related lymphedema by lymphaticovenous anastomosis (LVA): Study protocol of a multicenter randomized controlled trial.

|                               |                                                                                                                                                                                                                                                                                                                                                                                                                                                                                                                                                                                                                                                                                                                                                                                                                               |
|-------------------------------|-------------------------------------------------------------------------------------------------------------------------------------------------------------------------------------------------------------------------------------------------------------------------------------------------------------------------------------------------------------------------------------------------------------------------------------------------------------------------------------------------------------------------------------------------------------------------------------------------------------------------------------------------------------------------------------------------------------------------------------------------------------------------------------------------------------------------------|
| Journal:                      | <i>BMJ Open</i>                                                                                                                                                                                                                                                                                                                                                                                                                                                                                                                                                                                                                                                                                                                                                                                                               |
| Manuscript ID                 | bmjopen-2019-035337                                                                                                                                                                                                                                                                                                                                                                                                                                                                                                                                                                                                                                                                                                                                                                                                           |
| Article Type:                 | Protocol                                                                                                                                                                                                                                                                                                                                                                                                                                                                                                                                                                                                                                                                                                                                                                                                                      |
| Date Submitted by the Author: | 28-Oct-2019                                                                                                                                                                                                                                                                                                                                                                                                                                                                                                                                                                                                                                                                                                                                                                                                                   |
| Complete List of Authors:     | Wolfs, Joost; Maastricht University Medical Centre+, Beugels, Jop; Maastricht University Medical Centre+, Plastic & Reconstructive Surgery<br>Kimman, Merel; Maastricht Universitair Medisch Centrum+, Piatkowski de Grzymala, Andrzej; Maastricht University Medical Centre+, Plastic, Reconstructive, and Hand surgery<br>Heuts, Esther; Maastricht University Medical Centre+, Surgery<br>Keuter, Xavier; Maastricht University Medical Centre+, Plastic, Reconstructive, and Hand surgery<br>Tielemans, Hanneke; Radboudumc, Plastic, Reconstructive & Hand Surgery<br>Ulrich, Dietmar; Radboudumc, Plastic, Reconstructive & Hand Surgery<br>van der Hulst, R; Maastricht University Medical Center, Plastic surgery<br>Qiu, Shan Shan; Maastricht University Medical Centre+, Plastic, Reconstructive, and Hand surgery |
| Keywords:                     | PLASTIC & RECONSTRUCTIVE SURGERY, Breast surgery < SURGERY, Plastic & reconstructive surgery < SURGERY                                                                                                                                                                                                                                                                                                                                                                                                                                                                                                                                                                                                                                                                                                                        |
|                               |                                                                                                                                                                                                                                                                                                                                                                                                                                                                                                                                                                                                                                                                                                                                                                                                                               |

SCHOLARONE™  
Manuscripts

1  
2  
3 **Improving the quality of life of patients with breast cancer-related lymphedema by**  
4 **lymphaticovenous anastomosis (LVA): Study protocol of a multicenter randomized**  
5 **controlled trial.**  
6  
7  
8  
9

10  
11  
12  
13 J.A.G.N. **Wolfs** *MD*<sup>1</sup>, J. **Beugels** *MD*<sup>1</sup>, M. **Kimman** *PhD*<sup>2</sup>, A. **Piatkowski** *MD PhD*<sup>1</sup>, E.M.

14  
15 **Heuts** *MD PhD*<sup>3</sup>, X.H.A. **Keuter** *MD PhD*<sup>1</sup>, H.J.P. **Tielemans** *MD*<sup>4</sup>, D.J.O. **Ulrich** *MD PhD*

16  
17  
18 <sup>4</sup>, R.R.W.J. **van der Hulst** *MD PhD*<sup>1</sup>, S.S. **Qiu** *MD PhD*<sup>1</sup>.  
19  
20  
21  
22

23 **Author affiliations**

24  
25 1 Department of Plastic and Reconstructive Surgery, Maastricht University Medical  
26 Center, Maastricht, The Netherlands

27  
28  
29 2 Department of Clinical Epidemiology and Medical Technology Assessment,  
30 Maastricht University Medical Center, Maastricht, Netherlands

31  
32  
33 3 Department of Surgery, Maastricht University Medical Center, Maastricht, The  
34 Netherlands

35  
36  
37 4 Department of Plastic and Reconstructive Surgery, Radboud University Medical  
38 Center, Nijmegen, The Netherlands  
39  
40  
41  
42  
43  
44

45 **Corresponding author**

46 Shan Shan Qiu, *MD PhD*

47 Department of Plastic, Reconstructive and Hand surgery

48 Maastricht University Medical Center

49 P. Debyelaan 25, 6229 HX Maastricht, The Netherlands

50 Telephone: (+31) 043-3875474

51 Fax: (+31) 043-3875473  
52  
53  
54  
55  
56  
57  
58  
59  
60

Email: shanshan.qiushao@mumc.nl

## Abstract

**Introduction.** Early breast cancer detection and advancements in treatment options have resulted in an increase of breast cancer survivors. An increasing number of women are living with the long-term effects of breast cancer treatment, making the quality of survivorship an increasingly important goal. Breast cancer-related lymphedema (BCRL) is one of the most underestimated complications of breast cancer treatment with a reported incidence of 20%. A microsurgical technique called lymphaticovenous anastomosis (LVA) might be a promising treatment modality for patients with BCRL.

The main objective is to assess whether LVA is more effective than the current standard therapy (conservative treatment) in terms of improvement in quality of life and cost-effectiveness.

**Methods and analysis.** A multicenter, randomized controlled trial, carried out in two academic and two community hospitals in the Netherlands. The study population includes 120 women over the age of 18 who underwent treatment for breast cancer including axillary treatment (SLNB or ALNT) and/or axillary radiotherapy, presenting with an early stage lymphedema of the arm, viable lymphatic vessels, and received at least three months conservative treatment. Sixty participants will undergo the LVA operation and the other sixty will continue conservative treatment, both with a follow-up of 24 months.

The primary outcome is the health-related quality of life. The secondary outcomes are (in)direct costs, QALYs, cost-effectiveness ratio, discontinuation rate of conservative treatment, and excess limb volume.

**Ethics and dissemination.** The study was approved by the Ethics Committee of Maastricht University Medical Centre on 19 December 2018 (NL67059.068.18). The results of this study

1  
2  
3 will be disseminated in presentations at academic conferences, publications in peer-reviewed  
4  
5 journals, and other news media.  
6  
7

8  
9 **Registration details.** The study is registered in the trial register [www.clinicaltrials.gov](http://www.clinicaltrials.gov) with  
10  
11 number NCT02790021.  
12  
13

### 14 15 16 17 18 **Strengths and limitations of this study** 19

- 20 - This is the first multicenter RCT that compares lymphaticovenous anastomosis  
21 operation with conservative therapy (the standard care) in patients with breast cancer-  
22 related lymphedema.  
23  
24
- 25 - Effectiveness of lymphaticovenous anastomosis is examined in terms of patient-  
26 relevant, clinical and economic outcomes; health-related quality of life, excess limb  
27 volume, discontinuation rate of conservative treatment, societal costs, and cost-  
28 effectiveness.  
29  
30
- 31 - This study contains digital questionnaires with automatic warnings in case of blank  
32 answers to minimize missing data.  
33  
34
- 35 - Cost-effectiveness analysis may not be generalizable to other countries.  
36  
37  
38  
39  
40  
41  
42  
43  
44  
45  
46

### 47 **Key words** 48

49 Breast cancer lymphedema, lymphaticovenous anastomosis, conservative treatment,  
50  
51 randomized controlled trial, quality of life  
52  
53  
54  
55  
56  
57  
58  
59  
60

## Study title

Long study title: *Improving the quality of life of patients with breast cancer-related lymphedema by lymphaticovenous anastomosis (LVA): A multicenter randomized controlled trial protocol.*

Study Acronym: *LYMPH trial*

## Introduction

An increasing number of women survive breast cancer due to advancements in treatment options. As a result, the number of women living with the long-term effects of breast cancer treatment grows, making the quality of survivorship more relevant. Between 8-56% of breast cancer survivors develop arm or shoulder problems such as restricted shoulder mobility, shoulder pain, and lymphedema (1-6), with one of the most underestimated and debilitating morbidities of them all being upper-limb lymphedema.

Up to 70% of the patients who develop breast cancer-related lymphedema (BCRL) do so within the first two years post-treatment, cases have been described of women developing upper limb lymphedema 20 years or later after initial treatment (7-13). In the Netherlands, between 7% and 30% of the 14,000 annual patients with invasive breast cancer will develop lymphedema depending on certain treatment and patient related risk factors (14, 15).

The following risk factors are associated with the development (and severity) of BCRL: the extent of breast/axillary surgery, adjuvant radiation, (neo-)adjuvant chemotherapy, the number of positive nodes, treatment in dominant limb, and obesity (1, 16-19). Limb swelling may present with symptoms of heaviness, tightness, pain, and loss of normal upper-limb function and range of motion. The negative psychological effects brought on by the impairments of activities in daily life and reduced limb aesthetics constitute an additional burden and decrease in health-related quality of life (HRQoL) (7, 11, 13). Moreover,

1  
2  
3 infections of the skin are regularly seen in a severe stadium of lymphedema, such as  
4  
5 erysipelas or cellulitis (4, 8).  
6  
7  
8  
9

### 10 *Conservative therapy*

11  
12 Complex decongestive therapy (CDT), currently accepted as the standard treatment  
13  
14 method for lymphedema, is initially aimed at alleviating symptoms without curative intent,  
15  
16 which for most patients means lifelong treatment and a constant reminder of the breast cancer  
17  
18 period. CDT includes general skin care, patient education, compression therapy with  
19  
20 compression bandages and stockings, manual lymphatic drainage, and exercise therapy (14,  
21  
22 20, 21). A systematic review concluded that compression stockings in combination with  
23  
24 manual lymph drainage induces a significant limb volume reduction of 17 to 60 % (22).  
25  
26 Another RCT demonstrated a 29% reduction in excess limb volume with combined  
27  
28 conservative therapy (23). However, after reaching maximum limb volume reduction,  
29  
30 compression stockings are lifelong necessary for the patients to maintain the volume  
31  
32 reduction obtained.  
33  
34  
35  
36  
37  
38  
39

### 40 *Lymphaticovenous anastomosis*

41  
42 Connections can be made between the lymphatic and venous systems to divert static  
43  
44 lymph fluid away from the obstruction site in a technique called lymphaticovenous  
45  
46 anastomosis (LVA) (24). Due to advancements, microvascular surgery is more developed and  
47  
48 anastomoses in vessels as small as 0.3mm in diameter are made possible.  
49  
50

51  
52 Several studies on lymphatic super microsurgery performing LVA are available (25-  
53  
54 36). Most of the studies describe results on both upper and lower limb lymphedema and not  
55  
56 only secondary lymphedema (25, 33). Nevertheless, studies mention a volume or  
57  
58 circumference decrease between 30% and 61%, and positive results on subjective complaints  
59  
60

1  
2  
3 with low incidence or no complications (25-27, 29, 30, 35, 36). Furthermore, 56% of the  
4  
5 patients eventually were able to discontinue compression stockings after an LVA  
6  
7 procedure(25).  
8  
9

10 Many studies have been performed but most of them report on a small study  
11  
12 population. Furthermore most of them were retrospective, few were prospective, yet none of  
13  
14 them were randomized. Another disadvantage is the heterogeneity of the patient population,  
15  
16 assessment modalities, and inconsistent reporting of outcomes and complications (25, 28, 33).  
17  
18

19 The aim of this multicenter RCT is to examine HRQoL and cost-effectiveness of LVA  
20  
21 compared with CDT in patients with BCRL.  
22  
23  
24  
25  
26

## 27 **Methods and analysis**

### 28 **Study Design**

29  
30  
31  
32  
33  
34 The LYMPH trial is a multicenter, non-blinded, randomized controlled trial and will  
35  
36 be conducted in the Maastricht University Medical Centre, Radboud University Medical  
37  
38 Centre, Zuyderland Medical Centre, and Canisius-Wilhelmina Hospital in the Netherlands.  
39  
40  
41

42  
43 Enrolment will take place at the outpatient clinics of the participating hospitals. The  
44  
45 inclusion and exclusion criteria are listed in Table 1. A total of 120 women must be recruited  
46  
47 after a period of two years. After inclusion and informed consent, participants will be  
48  
49 randomly assigned to either the LVA or conservative (CDT) group with a 1:1 allocation as per  
50  
51 a computer generated randomization schedule stratified by site using block randomization.  
52  
53 The start date of the study is November 2018 and the estimated completion date of the study  
54  
55 is November 2022. An overview of the study design is shown in Figure 1.  
56  
57  
58  
59  
60



**Table 1** Inclusion and exclusion criteria

---

*Inclusion criteria*

---

- Woman over 18 years old
- Breast cancer treatment with SLNB, ALND, or axillary Rt
- Early stage lymphedema of the arm (stage 1 – 2a on ISL classification)
- Viable lymphatic vessels as determined by ICG lymphography, stage  $\leq$  3.
- At least three months conservative therapy (standard of care)
- Primary breast cancer
- Unilateral disease and treatment
- Informed consent

---

*Exclusion criteria*

---

- History of earlier lymph reconstruction efforts
- Recurrent breast cancer
- Distant breast cancer metastases
- Bilateral lymphedema
- Primary congenital lymphedema

---

*SLNB; Sentinel Lymph Node Biopsy, ALND; Axillary Lymph Node Dissection, Rt; radiotherapy, ISL; International Society of Lymphology*

**Interventions to be measured**Group A: Conservative Therapy

The current standard of treatment for BCRL is a combination of different methods of conservative therapy, also known as complex decongestive therapy (CDT) (14). CDT incorporates two stages of treatment. The first treatment phase entails skincare, manual

1  
2  
3 lymphatic drainage (MLD), exercises aimed at improvement of mobility/range of motion in  
4  
5 the shoulder, elbow or wrist joints, and compression therapy through bandaging. CDT in the  
6  
7 second treatment phase is aimed at maintenance of the achieved limb volume/ circumference  
8  
9 reduction through compression therapy with therapeutic elastic stocking for the arm. Skincare,  
10  
11 mobility exercises, and MLD is continued in this phase if needed (14, 22).  
12  
13  
14  
15  
16

### 17 *Complex decongestive therapy*

18  
19 Patients allocated to group A will be referred to one of the following dedicated  
20  
21 lymphedema (physical-/skin-) therapy clinics according to their place of residence for  
22  
23 continuation of standard conservative therapy. Only standard conservative therapy, as they  
24  
25 would have gotten if not participating in this study, will take place in these clinics, no study  
26  
27 measurements.  
28  
29

30  
31 All women identified with lymphedema will be treated according to a protocol which  
32  
33 is already in use for patients not participating in this study, since it is considered as the best  
34  
35 available standard care. To be able to compare the outcomes for the conservative therapy  
36  
37 group, a standardized treatment protocol using the standard lymphatic drainage methods  
38  
39 applied in the Netherlands and Germany ('Verdonkmethod' and 'Asdonkmethod',  
40  
41 respectively), will be used in this study.  
42  
43  
44  
45  
46  
47  
48

### 49 Group B: Surgical treatment

#### 50 51 *Lymphaticovenous anastomosis*

52  
53 LVA is a relative minimally invasive registered procedure which can be performed  
54  
55 under local anesthesia. The patient lies comfortable on the operation table and a limb table is  
56  
57 used. The limb is then prepared for surgery.  
58  
59  
60

1  
2  
3 Before making the incision, a mix of bupivacaine (Marcaïne®) and epinephrine (1:100.000) is  
4  
5 injected at the site of incision to achieve local anesthesia and optimal hemostasis.  
6

7  
8 The following steps of the operation are performed using a surgical microscope. Based on the  
9  
10 ICG lymphography mapping, incisions of 1 to 2 cm are made at the predetermined sites.  
11

12 Lymphatic vessels are identified and an anastomosis is performed with a similarly sized  
13  
14 adjacent recipient vein in the subdermal plane. The anastomosis is usually performed in an  
15  
16 end-to-end fashion in case both the lymphatic vessel and vein have approximately the same  
17  
18 caliber (otherwise end-to-side). The end-to-end anastomose is created with an 11-0 suture.  
19

20  
21 The patency of the LVA is confirmed by direct visual examination under the microscope. On  
22  
23 average 1 to 4 anastomosis are performed in a lymphedematous arm. The superficial wound is  
24  
25 closed using 4-0 Ethilon covered by adhesive plasters and a bandage. The operation length is  
26  
27 approximately two to three hours (27).  
28  
29  
30  
31

### 32 33 *Post-operative treatment*

34  
35 After surgery, patients will be treated with conservative therapy for 3 months (37).  
36  
37 After this period, it will be determined whether conservative therapy can be reduced or  
38  
39 stopped. Follow-up moments will be at 3, 6, 12, 18 and 24 months post-operatively. The same  
40  
41 follow-up moments apply for the CDT group.  
42  
43  
44  
45  
46  
47

### 48 **Sample size calculation**

49  
50 We made the following assumptions for the calculation of the sample size to show a  
51  
52 statistically significant and clinically relevant difference in quality of life between treatment  
53  
54 groups at 12 months follow-up as measured with the Lymph-ICF:  
55  
56  
57  
58  
59  
60

1  
2  
3 Comparing LVA to conservative treatment, the minimal difference in health-related quality of  
4 life (HRQoL) that is considered as clinically relevant is 15 points (15% decrease on the 0 to  
5 100 scale) on the Lymph-ICF questionnaire at 12 months follow-up (38).  
6  
7

8  
9  
10 To be able to achieve a power of 80%, a total of 45 patients are needed per treatment group,  
11 when the standard deviation is 25%, using an alpha of 0.05. If a drop-out rate (loss-to-follow-  
12 up and patients with missing data) of 25% is taken into account, a sample size of 60 patients  
13 per treatment group is required and a total of 120 patients will be randomized.  
14  
15  
16

17  
18  
19 Using the numbers described above a sample size calculation results in a sample size of 60  
20 patients in each group.  
21  
22

## 23 24 25 **Outcomes**

### 26 27 28 *Primary outcome*

29  
30  
31 The primary outcome is HRQoL at 12 months follow-up. To assess the effectiveness  
32 of the treatment we will use the Dutch version of the “Lymphedema Functioning, Disability  
33 and Health” (Lymph-ICF) questionnaire. This questionnaire assesses the impairments in  
34 function, activity limitations, and participation restrictions of patients with arm lymphedema.  
35  
36  
37 It is a validated, disease-specific questionnaire, consisting of 29 items (questions) across 5  
38 domains. Each item is scored on a VAS ranging from 0 to 100. The total score on the Lymph-  
39 ICF is equal to the sum of the item scores divided by the total number of answered items. A  
40  
41  
42  
43  
44  
45  
46  
47  
48  
49  
50  
51  
52  
53  
54  
55  
56  
57  
58  
59  
60  
61  
62  
63  
64  
65  
66  
67  
68  
69  
70  
71  
72  
73  
74  
75  
76  
77  
78  
79  
80  
81  
82  
83  
84  
85  
86  
87  
88  
89  
90  
91  
92  
93  
94  
95  
96  
97  
98  
99  
100  
101  
102  
103  
104  
105  
106  
107  
108  
109  
110  
111  
112  
113  
114  
115  
116  
117  
118  
119  
120  
121  
122  
123  
124  
125  
126  
127  
128  
129  
130  
131  
132  
133  
134  
135  
136  
137  
138  
139  
140  
141  
142  
143  
144  
145  
146  
147  
148  
149  
150  
151  
152  
153  
154  
155  
156  
157  
158  
159  
160  
161  
162  
163  
164  
165  
166  
167  
168  
169  
170  
171  
172  
173  
174  
175  
176  
177  
178  
179  
180  
181  
182  
183  
184  
185  
186  
187  
188  
189  
190  
191  
192  
193  
194  
195  
196  
197  
198  
199  
200  
201  
202  
203  
204  
205  
206  
207  
208  
209  
210  
211  
212  
213  
214  
215  
216  
217  
218  
219  
220  
221  
222  
223  
224  
225  
226  
227  
228  
229  
230  
231  
232  
233  
234  
235  
236  
237  
238  
239  
240  
241  
242  
243  
244  
245  
246  
247  
248  
249  
250  
251  
252  
253  
254  
255  
256  
257  
258  
259  
260  
261  
262  
263  
264  
265  
266  
267  
268  
269  
270  
271  
272  
273  
274  
275  
276  
277  
278  
279  
280  
281  
282  
283  
284  
285  
286  
287  
288  
289  
290  
291  
292  
293  
294  
295  
296  
297  
298  
299  
300  
301  
302  
303  
304  
305  
306  
307  
308  
309  
310  
311  
312  
313  
314  
315  
316  
317  
318  
319  
320  
321  
322  
323  
324  
325  
326  
327  
328  
329  
330  
331  
332  
333  
334  
335  
336  
337  
338  
339  
340  
341  
342  
343  
344  
345  
346  
347  
348  
349  
350  
351  
352  
353  
354  
355  
356  
357  
358  
359  
360  
361  
362  
363  
364  
365  
366  
367  
368  
369  
370  
371  
372  
373  
374  
375  
376  
377  
378  
379  
380  
381  
382  
383  
384  
385  
386  
387  
388  
389  
390  
391  
392  
393  
394  
395  
396  
397  
398  
399  
400  
401  
402  
403  
404  
405  
406  
407  
408  
409  
410  
411  
412  
413  
414  
415  
416  
417  
418  
419  
420  
421  
422  
423  
424  
425  
426  
427  
428  
429  
430  
431  
432  
433  
434  
435  
436  
437  
438  
439  
440  
441  
442  
443  
444  
445  
446  
447  
448  
449  
450  
451  
452  
453  
454  
455  
456  
457  
458  
459  
460  
461  
462  
463  
464  
465  
466  
467  
468  
469  
470  
471  
472  
473  
474  
475  
476  
477  
478  
479  
480  
481  
482  
483  
484  
485  
486  
487  
488  
489  
490  
491  
492  
493  
494  
495  
496  
497  
498  
499  
500  
501  
502  
503  
504  
505  
506  
507  
508  
509  
510  
511  
512  
513  
514  
515  
516  
517  
518  
519  
520  
521  
522  
523  
524  
525  
526  
527  
528  
529  
530  
531  
532  
533  
534  
535  
536  
537  
538  
539  
540  
541  
542  
543  
544  
545  
546  
547  
548  
549  
550  
551  
552  
553  
554  
555  
556  
557  
558  
559  
560  
561  
562  
563  
564  
565  
566  
567  
568  
569  
570  
571  
572  
573  
574  
575  
576  
577  
578  
579  
580  
581  
582  
583  
584  
585  
586  
587  
588  
589  
590  
591  
592  
593  
594  
595  
596  
597  
598  
599  
600  
601  
602  
603  
604  
605  
606  
607  
608  
609  
610  
611  
612  
613  
614  
615  
616  
617  
618  
619  
620  
621  
622  
623  
624  
625  
626  
627  
628  
629  
630  
631  
632  
633  
634  
635  
636  
637  
638  
639  
640  
641  
642  
643  
644  
645  
646  
647  
648  
649  
650  
651  
652  
653  
654  
655  
656  
657  
658  
659  
660  
661  
662  
663  
664  
665  
666  
667  
668  
669  
670  
671  
672  
673  
674  
675  
676  
677  
678  
679  
680  
681  
682  
683  
684  
685  
686  
687  
688  
689  
690  
691  
692  
693  
694  
695  
696  
697  
698  
699  
700  
701  
702  
703  
704  
705  
706  
707  
708  
709  
710  
711  
712  
713  
714  
715  
716  
717  
718  
719  
720  
721  
722  
723  
724  
725  
726  
727  
728  
729  
730  
731  
732  
733  
734  
735  
736  
737  
738  
739  
740  
741  
742  
743  
744  
745  
746  
747  
748  
749  
750  
751  
752  
753  
754  
755  
756  
757  
758  
759  
760  
761  
762  
763  
764  
765  
766  
767  
768  
769  
770  
771  
772  
773  
774  
775  
776  
777  
778  
779  
780  
781  
782  
783  
784  
785  
786  
787  
788  
789  
790  
791  
792  
793  
794  
795  
796  
797  
798  
799  
800  
801  
802  
803  
804  
805  
806  
807  
808  
809  
810  
811  
812  
813  
814  
815  
816  
817  
818  
819  
820  
821  
822  
823  
824  
825  
826  
827  
828  
829  
830  
831  
832  
833  
834  
835  
836  
837  
838  
839  
840  
841  
842  
843  
844  
845  
846  
847  
848  
849  
850  
851  
852  
853  
854  
855  
856  
857  
858  
859  
860  
861  
862  
863  
864  
865  
866  
867  
868  
869  
870  
871  
872  
873  
874  
875  
876  
877  
878  
879  
880  
881  
882  
883  
884  
885  
886  
887  
888  
889  
890  
891  
892  
893  
894  
895  
896  
897  
898  
899  
900  
901  
902  
903  
904  
905  
906  
907  
908  
909  
910  
911  
912  
913  
914  
915  
916  
917  
918  
919  
920  
921  
922  
923  
924  
925  
926  
927  
928  
929  
930  
931  
932  
933  
934  
935  
936  
937  
938  
939  
940  
941  
942  
943  
944  
945  
946  
947  
948  
949  
950  
951  
952  
953  
954  
955  
956  
957  
958  
959  
960  
961  
962  
963  
964  
965  
966  
967  
968  
969  
970  
971  
972  
973  
974  
975  
976  
977  
978  
979  
980  
981  
982  
983  
984  
985  
986  
987  
988  
989  
990  
991  
992  
993  
994  
995  
996  
997  
998  
999  
1000

51  
52 HRQoL will be measured at baseline and 3, 6, 12, 18 and 24 months after  
53 randomization.  
54  
55  
56  
57

### 58 59 60 *Secondary outcomes*

1  
2  
3           Secondary outcomes are the societal costs, QALYs, incremental cost-effectiveness,  
4  
5 discontinuation of conservative treatment, and excess limb volume. Assessment will be done  
6  
7 at baseline and 3, 6, 12, 18, and 24 months after randomization.  
8  
9

10           Costs include health care related costs, costs to patients and family, and costs due to  
11  
12 lost productivity. Complete individual level hospital resource use data (e.g. surgical  
13  
14 intervention, diagnostic procedures, hospital admissions, outpatient clinic visits) will be  
15  
16 measured using medical records and provider information systems. Resource use outside the  
17  
18 hospital (e.g. lymphedema therapy, general practitioner visits, out-of-pocket expenses such as  
19  
20 for therapeutic elastic stockings and over-the counter drugs, travel costs, and quantities of lost  
21  
22 paid work) will be determined by means of prospective cost diaries as kept by participants.  
23  
24 The cost diary developed for this study is an adapted version of the MCQ and PCQ (39). The  
25  
26 Dutch manual for costing research will be used to determine prices for each volume of  
27  
28 resource use (40).  
29  
30  
31

32  
33           The EQ-5D-5L is a generic HRQoL measure that can be used to calculate QALYs to  
34  
35 be used in the economic evaluation (41). The EQ-5D is a questionnaire responsive to changes  
36  
37 in health in breast cancer patients after conclusion of treatment (42).  
38  
39

40           The EQ-5D-5L examines a patient's HRQoL on the day of the interview. It consist of  
41  
42 the EQ-5D-5L descriptive system and a Visual Analog Scale ( EQ VAS). The descriptive  
43  
44 system comprises five dimensions: mobility, self-care, usual activities, pain/discomfort and  
45  
46 anxiety/depression. Each dimension has five levels: no problems, slight problems, moderate  
47  
48 problems, severe problems and extreme problems. Responses to the 5 items result in a  
49  
50 patient's health state that can be transformed into an index score representing a HRQoL-  
51  
52 weight, ranging between 0 (death) and 1 (perfect health) (43). These index scores are  
53  
54 combined with length of life to calculate the QALYs. The EQ VAS records the patient's self-  
55  
56  
57  
58  
59  
60

1  
2  
3 rated health with endpoints labelled ‘the best health you can imagine’ at the top and ‘the worst  
4 health you can imagine’ at the bottom.  
5  
6

7           Discontinuation of conservative treatment will be assessed with a patient diary to  
8 record the frequency of treatments received (i.e. skin therapy visits, number of stockings,  
9 etc.).  
10  
11  
12

13  
14           Lastly, bilateral limb volume measurements will be done using VECTRA 3D imaging  
15 and the water displacement method. The excess limb volume is measured as the difference in  
16 volume between the affected and unaffected limb, which is reported as a percentage of the  
17 volume of the unaffected limb. A relative volume reduction (relative to the unaffected arm) as  
18 well as an absolute volume reduction (volume reduction of the affected arm at next  
19 measurement) will be calculated. The calculated volume will be corrected for the body mass  
20 index and for volume differences between the dominant and non-dominant arm.  
21  
22  
23  
24  
25  
26  
27  
28  
29

30           Besides using the water displacement method, volume measurement will also be done  
31 by arm circumference measurement using tape. Both arms will be measured during every visit  
32 at the level of the olecranon, 5 and 10 centimeters proximally, 5 and 10 centimeters distally, at  
33 the level of the wrist and the dorsum of the hand.  
34  
35  
36  
37  
38  
39

40           In the out-patient clinic, a fluorescent marker, called indocyanine green (ICG) is  
41 injected intracutaneously into the second and fourth finger webspace of the lymphedematous  
42 limb and a so called ICG lymphography is performed in search for viable lymphatic vessels.  
43 This is a technique using near-infrared fluorescence imaging (NIRF). After 0.05 ml of ICG  
44 (5mg/ml) is injected, a near-infrared camera is used to visualize the lymphatic vessels.  
45 Proximal to the injection sites fluorescent stains are identified. When using the images as a  
46 guide, the lymphatic pathways and the sites for incisions for lymphaticovenous anastomoses  
47 are marked with a pen and a color picture is taken. These color pictures are used to identify  
48  
49  
50  
51  
52  
53  
54  
55  
56  
57  
58  
59  
60

1  
2  
3 the location when LVA will be performed. NIRF will be done at introduction visit and  
4  
5 patency testing after 12 and 24 months.  
6  
7  
8  
9

## 10 **Data analysis**

11  
12  
13 For the HRQoL a paired Student's t-test will be used to evaluate the changes in quality  
14  
15 of life scores and in limb volume measurements between pre-inclusion and the different post-  
16  
17 inclusion periods of time within individuals from the same study group. For each of the  
18  
19 follow-up moments (3, 6, 12, 18 and 24 months) the change in quality of life from baseline  
20  
21 will be compared between groups using the two sample unpaired t-test, to evaluate short- and  
22  
23 long-term treatment effects. If baseline imbalance is present, assessed qualitatively, adjusted  
24  
25 differences per follow-up moment will be computed using linear regression. In addition to  
26  
27 statistical testing per follow-up measurement, a linear mixed-effects model will be used to test  
28  
29 for an overall difference between the two groups. To account for clustering of measurements  
30  
31 at the patient-level, a model with a random intercept and random slope will be used.  
32  
33  
34  
35  
36  
37

## 38 *Economic evaluation*

39  
40 An economic evaluation will be performed alongside the clinical trial to determine the cost-  
41  
42 effectiveness of LVA compared to CDT. The design of the economic evaluation follows the  
43  
44 principles of a cost-utility analysis and adheres to the Dutch guideline for economic  
45  
46 evaluations in health care and the Dutch manual for costing research (44, 45) Outcome  
47  
48 measures for the economic evaluation will be costs, health-related quality of life, and quality  
49  
50 adjusted life years (QALYs). The trial-based evaluation adopts a societal perspective and has  
51  
52 a time horizon of two years.  
53  
54  
55

56 An incremental cost-effectiveness ratio (ICER), i.e. cost per QALY gained, will be  
57  
58 calculated by dividing the difference in costs between the two treatments with the difference  
59  
60

1  
2  
3 in QALYs. Bootstrapping techniques will be used to summarize the uncertainty in estimates  
4  
5 of incremental costs, effects, and the ICER. In addition, cost-effectiveness acceptability  
6  
7 curves (CEACs) will show the probability that LVA is cost-effective compared to  
8  
9 conservative treatment, given the observed data, for a range of maximum monetary values  
10  
11 that a decision-maker might be willing to pay for a QALY gained.  
12  
13  
14

15  
16 The impact of uncertainty surrounding deterministic parameters (for example prices) on the  
17  
18 ICER will be explored using one-way sensitivity analyses. Results, presented in a tornado  
19  
20 diagram, can help determine which parameters are key drivers of the cost-effectiveness  
21  
22 results. Pre-determined subgroup analyses will address possible variation between patients  
23  
24 (heterogeneity).  
25  
26

27  
28 In the case of missing values occur, this will be solved by imputation by means of mean  
29  
30 substitution.  
31  
32

## 33 34 **Ethics and Dissemination**

### 35 36 37 **Data monitoring**

38  
39  
40  
41 Data will be handled confidentially. Source data will be stored by the investigator in a  
42  
43 locked place. Data of all measurements during follow-up moments, (Serious) Adverse Events  
44  
45 and digital questionnaires including patient cost diary is stored immediately in the online  
46  
47 database of CASTOR EDC ©. The investigator and project leader only have access to this  
48  
49 database with an account with password. Identifying data will be stored in coded form; the  
50  
51 key to the form is known only to the supervisor, the investigator, the Dutch Health Care  
52  
53 Inspectorate (IGJ), the study monitors, and the members of the review committee.  
54  
55  
56  
57

### 58 59 **Harms**

60



1  
2  
3 Adverse events (AEs) are defined as any undesirable experience occurring to a subject  
4 during the study, whether or not considered related to the trial procedure. Adverse events  
5 related to the LVA operation or conservative therapy that have a possible impact on the  
6 lymphedema and reported spontaneously by the subject or observed by the investigator or his  
7 staff will be recorded directly in CASTOR EDC.  
8  
9  
10  
11  
12  
13

14 The research team will report the serious adverse event (SAEs) through the web portal  
15 *ToetsingOnline* to the accredited METC that approved the protocol, within 7 days of first  
16 knowledge for SAEs that result in death or are life threatening followed by a period of  
17 maximum of 8 days to complete the initial preliminary report. All other SAEs will be reported  
18 within a period of maximum 15 days after the research team has first knowledge of the  
19 serious adverse events.  
20  
21  
22  
23  
24  
25  
26  
27  
28

### 29 **Auditing**

30  
31  
32  
33 Monitoring of the conduct of the study will be done by the Clinical Trial Center  
34 Maastricht on a frequent basis following their protocol as is requested by the Board.  
35  
36  
37  
38  
39

### 40 **Protocol amendments**

41  
42  
43 Any modifications to the protocol which may impact the study will be notified to the  
44 METC that gave a favourable opinion prior to implementation.  
45  
46  
47  
48

### 49 **Patient and public involvement**

50  
51  
52 Patients were not involved in the development of the research question, study design  
53 or recruitment into the study.  
54  
55  
56  
57

### 58 **Ethical considerations**

1  
2  
3 This study will be conducted according to the principles of the Declaration of  
4 Helsinki, recently changed in Fortaleza (2013) and in accordance with the Medical Research  
5 Involving Human Subjects Act (WMO). The study was approved by the Ethics Committee of  
6 Maastricht University Medical Centre on 19 December 2018 (NL67059.068.18). The study is  
7 registered in the trial register [www.clinicaltrials.gov](http://www.clinicaltrials.gov) with number NCT02790021.  
8  
9  
10  
11  
12  
13  
14

## 15 16 **Dissemination**

17 The results of this study will be disseminated in presentations at academic  
18 conferences, publications in peer-reviewed journals and other news media. Data will be kept  
19 confidential and will not be shared with the public. Requests for data sharing for appropriate  
20 research purposes will be considered on an individual basis after trial completion and after  
21 publication of primary manuscripts.  
22  
23  
24  
25  
26  
27  
28  
29  
30  
31  
32  
33

## 34 35 **References**

- 36  
37 1. Ahmed RL, Prizment A, Lazovich D, Schmitz KH, Folsom AR. Lymphedema and  
38 quality of life in breast cancer survivors: the Iowa Women's Health Study. *J Clin Oncol.*  
39 2008;26(35):5689-96.  
40  
41
- 42  
43 2. Ahmed RL, Schmitz KH, Prizment AE, Folsom AR. Risk factors for lymphedema in  
44 breast cancer survivors, the Iowa Women's Health Study. *Breast Cancer Res Treat.*  
45 2011;130(3):981-91.  
46  
47  
48
- 49  
50 3. Engel J, Kerr J, Schlesinger-Raab A, Sauer H, Holzel D. Axilla surgery severely  
51 affects quality of life: results of a 5-year prospective study in breast cancer patients. *Breast*  
52 *Cancer Res Treat.* 2003;79(1):47-57.  
53  
54  
55
- 56  
57 4. Fu MR. Breast cancer-related lymphedema: Symptoms, diagnosis, risk reduction, and  
58 management. *World J Clin Oncol.* 2014;5(3):241-7.  
59  
60

- 1  
2  
3 5. Nesvold IL, Fossa SD, Holm I, Naume B, Dahl AA. Arm/shoulder problems in breast  
4  
5 cancer survivors are associated with reduced health and poorer physical quality of life. *Acta*  
6  
7 *Oncol.* 2010;49(3):347-53.  
8
- 9  
10 6. Petrek JA, Heelan MC. Incidence of breast carcinoma-related lymphedema. *Cancer.*  
11  
12 1998;83(12 Suppl American):2776-81.  
13
- 14  
15 7. Chachaj A, Malyszczak K, Pyszczel K, Lukas J, Tarkowski R, Pudelko M, et al.  
16  
17 Physical and psychological impairments of women with upper limb lymphedema following  
18  
19 breast cancer treatment. *Psychooncology.* 2010;19(3):299-305.  
20
- 21  
22 8. DiSipio T, Rye S, Newman B, Hayes S. Incidence of unilateral arm lymphoedema  
23  
24 after breast cancer: a systematic review and meta-analysis. *Lancet Oncol.* 2013;14(6):500-15.  
25
- 26  
27 9. Dominick SA, Natarajan L, Pierce JP, Madanat H, Madlensky L. The psychosocial  
28  
29 impact of lymphedema-related distress among breast cancer survivors in the WHEL Study.  
30  
31 *Psychooncology.* 2014;23(9):1049-56.  
32
- 33  
34 10. Fu MR, Ridner SH, Hu SH, Stewart BR, Cormier JN, Armer JM. Psychosocial impact  
35  
36 of lymphedema: a systematic review of literature from 2004 to 2011. *Psychooncology.*  
37  
38 2013;22(7):1466-84.  
39
- 40  
41 11. Oliveri JM, Day JM, Alfano CM, Herndon JE, 2nd, Katz ML, Bittoni MA, et al.  
42  
43 Arm/hand swelling and perceived functioning among breast cancer survivors 12 years post-  
44  
45 diagnosis: CALGB 79804. *J Cancer Surviv.* 2008;2(4):233-42.  
46
- 47  
48 12. Petrek JA, Senie RT, Peters M, Rosen PP. Lymphedema in a cohort of breast  
49  
50 carcinoma survivors 20 years after diagnosis. *Cancer.* 2001;92(6):1368-77.  
51
- 52  
53 13. Voogd AC, Ververs JM, Vingerhoets AJ, Roumen RM, Coebergh JW, Crommelin  
54  
55 MA. Lymphoedema and reduced shoulder function as indicators of quality of life after  
56  
57 axillary lymph node dissection for invasive breast cancer. *Br J Surg.* 2003;90(1):76-81.  
58  
59  
60

- 1  
2  
3 14. Venereologie NvvDe. Richtlijn lymfoedeem. Multidisciplinaire evidence-based  
4  
5 richtlijn. [www.lymfoedeem.nl](http://www.lymfoedeem.nl); 2014.  
6  
7
- 8 15. Richtlijn mammacarcinoom. 2012. Available from: [www.oncoline.nl](http://www.oncoline.nl)  
9
- 10 16. Ashikaga T, Krag DN, Land SR, Julian TB, Anderson SJ, Brown AM, et al. Morbidity  
11  
12 results from the NSABP B-32 trial comparing sentinel lymph node dissection versus axillary  
13  
14 dissection. *J Surg Oncol*. 2010;102(2):111-8.  
15  
16
- 17 17. Coriddi M, Khansa I, Stephens J, Miller M, Boehmler J, Tiwari P. Analysis of factors  
18  
19 contributing to severity of breast cancer-related lymphedema. *Ann Plast Surg*. 2015;74(1):22-  
20  
21 5.  
22
- 23 18. Monleon S, Murta-Nascimento C, Bascuas I, Macia F, Duarte E, Belmonte R.  
24  
25 Lymphedema Predictor Factors after Breast Cancer Surgery: A Survival Analysis. *Lymphat*  
26  
27 *Res Biol*. 2015;13(4):268-74.  
28  
29
- 30 19. Tsai RJ, Dennis LK, Lynch CF, Snetselaar LG, Zamba GK, Scott-Conner C. The risk  
31  
32 of developing arm lymphedema among breast cancer survivors: a meta-analysis of treatment  
33  
34 factors. *Ann Surg Oncol*. 2009;16(7):1959-72.  
35  
36
- 37 20. Uzkeser H, Karatay S, Erdemci B, Koc M, Senel K. Efficacy of manual lymphatic  
38  
39 drainage and intermittent pneumatic compression pump use in the treatment of lymphedema  
40  
41 after mastectomy: a randomized controlled trial. *Breast Cancer*. 2015;22(3):300-7.  
42  
43
- 44 21. Vignes S, Porcher R, Arrault M, Dupuy A. Long-term management of breast cancer-  
45  
46 related lymphedema after intensive decongestive physiotherapy. *Breast Cancer Res Treat*.  
47  
48 2007;101(3):285-90.  
49  
50
- 51 22. McNeely ML, Peddle CJ, Yurick JL, Dayes IS, Mackey JR. Conservative and dietary  
52  
53 interventions for cancer-related lymphedema: a systematic review and meta-analysis. *Cancer*.  
54  
55 2011;117(6):1136-48.  
56  
57  
58  
59  
60

- 1  
2  
3 23. Dayes IS, Whelan TJ, Julian JA, Parpia S, Pritchard KI, D'Souza DP, et al.  
4  
5 Randomized trial of decongestive lymphatic therapy for the treatment of lymphedema in  
6  
7 women with breast cancer. *J Clin Oncol*. 2013;31(30):3758-63.  
8  
9  
10 24. O'Brien BM. Replantation and reconstructive microvascular surgery. Part II. *Ann R*  
11  
12 *Coll Surg Engl*. 1976;58(3):171-82.  
13  
14 25. Basta MN, Gao LL, Wu LC. Operative treatment of peripheral lymphedema: a  
15  
16 systematic meta-analysis of the efficacy and safety of lymphovenous microsurgery and tissue  
17  
18 transplantation. *Plast Reconstr Surg*. 2014;133(4):905-13.  
19  
20  
21 26. Chang DW. Lymphaticovenular bypass for lymphedema management in breast cancer  
22  
23 patients: a prospective study. *Plast Reconstr Surg*. 2010;126(3):752-8.  
24  
25  
26 27. Chang DW, Suami H, Skoracki R. A prospective analysis of 100 consecutive  
27  
28 lymphovenous bypass cases for treatment of extremity lymphedema. *Plast Reconstr Surg*.  
29  
30 2013;132(5):1305-14.  
31  
32  
33 28. Damstra RJ, Voesten HG, van Schelven WD, van der Lei B. Lymphatic venous  
34  
35 anastomosis (LVA) for treatment of secondary arm lymphedema. A prospective study of 11  
36  
37 LVA procedures in 10 patients with breast cancer related lymphedema and a critical review of  
38  
39 the literature. *Breast Cancer Res Treat*. 2009;113(2):199-206.  
40  
41  
42 29. Furukawa H, Osawa M, Saito A, Hayashi T, Funayama E, Oyama A, et al.  
43  
44 Microsurgical lymphaticovenous implantation targeting dermal lymphatic backflow using  
45  
46 indocyanine green fluorescence lymphography in the treatment of postmastectomy  
47  
48 lymphedema. *Plast Reconstr Surg*. 2011;127(5):1804-11.  
49  
50  
51 30. Koshima I, Inagawa K, Urushibara K, Moriguchi T. Supermicrosurgical  
52  
53 lymphaticovenular anastomosis for the treatment of lymphedema in the upper extremities. *J*  
54  
55 *Reconstr Microsurg*. 2000;16(6):437-42.  
56  
57  
58  
59  
60

- 1  
2  
3 31. Mihara M, Hara H, Hayashi Y, Iida T, Araki J, Yamamoto T, et al. Upper-limb  
4 lymphedema treated aesthetically with lymphaticovenous anastomosis using indocyanine  
5 green lymphography and noncontact vein visualization. *J Reconstr Microsurg.*  
6  
7  
8  
9  
10 2012;28(5):327-32.  
11  
12 32. Nagase T, Gonda K, Inoue K, Higashino T, Fukuda N, Gorai K, et al. Treatment of  
13 lymphedema with lymphaticovenular anastomoses. *Int J Clin Oncol.* 2005;10(5):304-10.  
14  
15 33. Penha TR, Ijsbrandy C, Hendrix NA, Heuts EM, Voogd AC, von Meyenfeldt MF, et  
16 al. Microsurgical techniques for the treatment of breast cancer-related lymphedema: a  
17 systematic review. *J Reconstr Microsurg.* 2013;29(2):99-106.  
18  
19 34. Torrisi JS, Joseph WJ, Ghanta S, Cuzzzone DA, Albano NJ, Savetsky IL, et al.  
20 Lymphaticovenous bypass decreases pathologic skin changes in upper extremity breast  
21 cancer-related lymphedema. *Lymphat Res Biol.* 2015;13(1):46-53.  
22  
23 35. Yamamoto Y, Horiuchi K, Sasaki S, Sekido M, Furukawa H, Oyama A, et al. Follow-  
24 up study of upper limb lymphedema patients treated by microsurgical lymphaticovenous  
25 implantation (MLVI) combined with compression therapy. *Microsurgery.* 2003;23(1):21-6.  
26  
27 36. Cornelissen AJM, Beugels J, Ewalds L, Heuts EM, Keuter XHA, Piatkowski A, et al.  
28 Effect of Lymphaticovenous Anastomosis in Breast Cancer-Related Lymphedema: A Review  
29 of the Literature. *Lymphat Res Biol.* 2018;16(5):426-34.  
30  
31 37. Masia J, Pons G, Nardulli ML. Combined Surgical Treatment in Breast Cancer-  
32 Related Lymphedema. *J Reconstr Microsurg.* 2016;32(1):16-27.  
33  
34 38. Devoogdt N, Van Kampen M, Geraerts I, Coremans T, Christiaens MR.  
35 Lymphoedema Functioning, Disability and Health questionnaire (Lymph-ICF): reliability and  
36 validity. *Phys Ther.* 2011;91(6):944-57.  
37  
38 39. Bouwmans Cea. Handleiding iMTA Medical Cost Questionnaire (iMCQ). 2013.  
39  
40  
41  
42  
43  
44  
45  
46  
47  
48  
49  
50  
51  
52  
53  
54  
55  
56  
57  
58  
59  
60

- 1  
2  
3 40. Lopez Penha TR, van Roozendaal LM, Smidt ML, Boersma LJ, von Meyenfeldt MF,  
4  
5 Voogd AC, et al. The changing role of axillary treatment in breast cancer: Who will remain at  
6  
7 risk for developing arm morbidity in the future? *Breast*. 2015;24(5):543-7.  
8  
9  
10 41. Herdman M, Gudex C, Lloyd A, Janssen M, Kind P, Parkin D, et al. Development and  
11  
12 preliminary testing of the new five-level version of EQ-5D (EQ-5D-5L). *Qual Life Res*.  
13  
14 2011;20(10):1727-36.  
15  
16 42. Kimman ML, Dirksen CD, Lambin P, Boersma LJ. Responsiveness of the EQ-5D in  
17  
18 breast cancer patients in their first year after treatment. *Health Qual Life Outcomes*.  
19  
20 2009;7:11.  
21  
22 43. Versteegh M VM, Evers MAAS, de Wit GA, Prenger R. Dutch Tariff for the Five-  
23  
24 Level Version of EQ-5D. *Value in health: the journal of the International Society for*  
25  
26 *Pharmacoeconomics and Outcomes Research*. 2016.  
27  
28 44. Zorginstituut. *Kostenhandleiding: Methodologie van kostenonderzoek en*  
29  
30 *referentieprijzen voor economische evaluaties in de gezondheidszorg*. 2015.  
31  
32 45. Zorginstituut. *Richtlijn voor het uitvoeren van economische evaluaties in de*  
33  
34 *gezondheidszorg*; 2015.  
35  
36  
37  
38  
39  
40  
41  
42  
43

## Footnotes

## Author Contributions

44  
45  
46  
47  
48 *JB, AP, EH, DU, RH, and SQ* conceived the study and initiated the study design. *MK* provided  
49  
50 statistical and cost-effectiveness expertise. *JW, XK, HT, DU, and SQ* completed the study  
51  
52 design and protocol. All authors contributed to refinement of the study protocol and approved  
53  
54 the final version.  
55  
56  
57  
58  
59  
60

## Funding

This work was supported by ZonMw, grant number 80-85200-98-91044 and Academic Hospital of Maastricht (azM).

### ZonMw

Postbus 93 245

2509 AE Den Haag

Telefoon 070 349 51 11

Fax 070 349 51 00

E-mail [info@zonmw.nl](mailto:info@zonmw.nl)

### azM

Postbus 5800

6202 AZ Maastricht

Tel: [043 387 6543](tel:0433876543)

## Competing interests

None declared.

## Patient consent for publication

Informed consent will be signed by every participant and obtained by the researcher after inclusion.



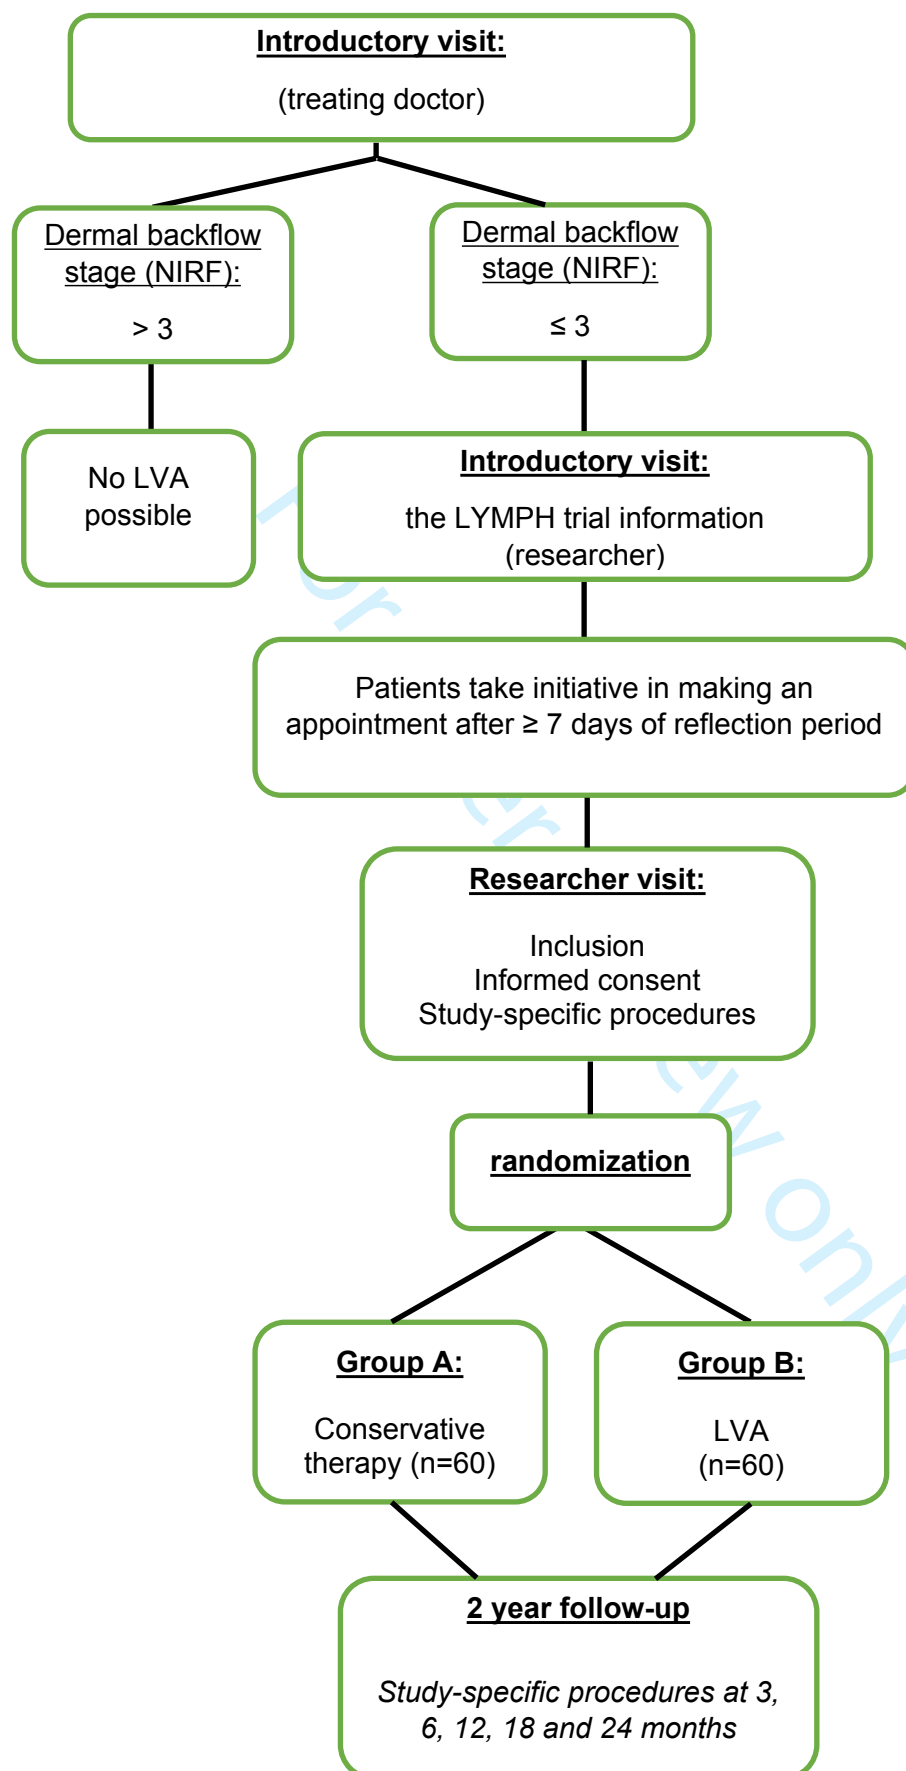

**Fig 1** Flowchart: overview of the study design

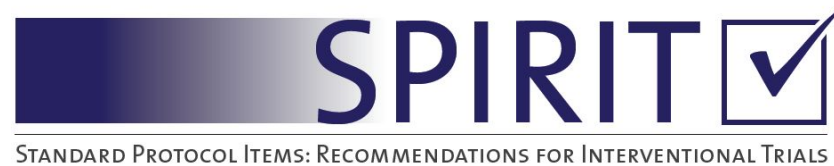

SPIRIT 2013 Checklist: Recommended items to address in a clinical trial protocol and related documents\*

| Section/item                      | Item No | Description                                                                                                                                                                                                                                                                              | Addressed on page number |
|-----------------------------------|---------|------------------------------------------------------------------------------------------------------------------------------------------------------------------------------------------------------------------------------------------------------------------------------------------|--------------------------|
| <b>Administrative information</b> |         |                                                                                                                                                                                                                                                                                          |                          |
| Title                             | 1       | Descriptive title identifying the study design, population, interventions, and, if applicable, trial acronym                                                                                                                                                                             | 1                        |
| Trial registration                | 2a      | Trial identifier and registry name. If not yet registered, name of intended registry                                                                                                                                                                                                     | 3, 16                    |
|                                   | 2b      | All items from the World Health Organization Trial Registration Data Set                                                                                                                                                                                                                 | yes                      |
| Protocol version                  | 3       | Date and version identifier                                                                                                                                                                                                                                                              | V4, 15-04-2019           |
| Funding                           | 4       | Sources and types of financial, material, and other support                                                                                                                                                                                                                              | 22                       |
| Roles and responsibilities        | 5a      | Names, affiliations, and roles of protocol contributors                                                                                                                                                                                                                                  | 1, 21                    |
|                                   | 5b      | Name and contact information for the trial sponsor                                                                                                                                                                                                                                       | 22                       |
|                                   | 5c      | Role of study sponsor and funders, if any, in study design; collection, management, analysis, and interpretation of data; writing of the report; and the decision to submit the report for publication, including whether they will have ultimate authority over any of these activities | NA                       |
|                                   | 5d      | Composition, roles, and responsibilities of the coordinating centre, steering committee, endpoint adjudication committee, data management team, and other individuals or groups overseeing the trial, if applicable (see Item 21a for data monitoring committee)                         | NA                       |

1 **Introduction**

2

3 Background and 6a Description of research question and justification for undertaking the trial, including summary of relevant 4-6  
 4 rationale studies (published and unpublished) examining benefits and harms for each intervention

5

6 6b Explanation for choice of comparators 4-6

7

8 Objectives 7 Specific objectives or hypotheses 6

9

10 Trial design 8 Description of trial design including type of trial (eg, parallel group, crossover, factorial, single group),  
 11 allocation ratio, and framework (eg, superiority, equivalence, noninferiority, exploratory) 6

12

13

14 **Methods: Participants, interventions, and outcomes**

15

16 Study setting 9 Description of study settings (eg, community clinic, academic hospital) and list of countries where data will 6  
 17 be collected. Reference to where list of study sites can be obtained

18

19 Eligibility criteria 10 Inclusion and exclusion criteria for participants. If applicable, eligibility criteria for study centres and 7  
 20 individuals who will perform the interventions (eg, surgeons, psychotherapists)

21

22 Interventions 11a Interventions for each group with sufficient detail to allow replication, including how and when they will be 7-9  
 23 administered

24

25 11b Criteria for discontinuing or modifying allocated interventions for a given trial participant (eg, drug dose NA  
 26 change in response to harms, participant request, or improving/worsening disease)

27

28 11c Strategies to improve adherence to intervention protocols, and any procedures for monitoring adherence NA  
 29 (eg, drug tablet return, laboratory tests)

30

31 11d Relevant concomitant care and interventions that are permitted or prohibited during the trial NA

32

33

34 Outcomes 12 Primary, secondary, and other outcomes, including the specific measurement variable (eg, systolic blood  
 35 pressure), analysis metric (eg, change from baseline, final value, time to event), method of aggregation (eg, 10-13  
 36 median, proportion), and time point for each outcome. Explanation of the clinical relevance of chosen  
 37 efficacy and harm outcomes is strongly recommended

38

39

40 Participant timeline 13 Time schedule of enrolment, interventions (including any run-ins and washouts), assessments, and visits for 6, Fig 1  
 41 participants. A schematic diagram is highly recommended (see Figure)

42

43

44

45

46

|   |             |    |                                                                                                                                                                                       |       |
|---|-------------|----|---------------------------------------------------------------------------------------------------------------------------------------------------------------------------------------|-------|
| 1 | Sample size | 14 | Estimated number of participants needed to achieve study objectives and how it was determined, including clinical and statistical assumptions supporting any sample size calculations | 9, 10 |
| 2 |             |    |                                                                                                                                                                                       |       |
| 3 |             |    |                                                                                                                                                                                       |       |
| 4 | Recruitment | 15 | Strategies for achieving adequate participant enrolment to reach target sample size                                                                                                   | 6     |
| 5 |             |    |                                                                                                                                                                                       |       |

### 6 **Methods: Assignment of interventions (for controlled trials)**

#### 7 Allocation:

|    |                                  |     |                                                                                                                                                                                                                                                                                                                                                          |          |
|----|----------------------------------|-----|----------------------------------------------------------------------------------------------------------------------------------------------------------------------------------------------------------------------------------------------------------------------------------------------------------------------------------------------------------|----------|
| 10 | Sequence generation              | 16a | Method of generating the allocation sequence (eg, computer-generated random numbers), and list of any factors for stratification. To reduce predictability of a random sequence, details of any planned restriction (eg, blocking) should be provided in a separate document that is unavailable to those who enrol participants or assign interventions | 6        |
| 11 |                                  |     |                                                                                                                                                                                                                                                                                                                                                          |          |
| 12 |                                  |     |                                                                                                                                                                                                                                                                                                                                                          |          |
| 13 |                                  |     |                                                                                                                                                                                                                                                                                                                                                          |          |
| 14 |                                  |     |                                                                                                                                                                                                                                                                                                                                                          |          |
| 15 |                                  |     |                                                                                                                                                                                                                                                                                                                                                          |          |
| 16 | Allocation concealment mechanism | 16b | Mechanism of implementing the allocation sequence (eg, central telephone; sequentially numbered, opaque, sealed envelopes), describing any steps to conceal the sequence until interventions are assigned                                                                                                                                                | NA       |
| 17 |                                  |     |                                                                                                                                                                                                                                                                                                                                                          |          |
| 18 |                                  |     |                                                                                                                                                                                                                                                                                                                                                          |          |
| 19 |                                  |     |                                                                                                                                                                                                                                                                                                                                                          |          |
| 20 | Implementation                   | 16c | Who will generate the allocation sequence, who will enrol participants, and who will assign participants to interventions                                                                                                                                                                                                                                | 6, Fig 1 |
| 21 |                                  |     |                                                                                                                                                                                                                                                                                                                                                          |          |
| 22 |                                  |     |                                                                                                                                                                                                                                                                                                                                                          |          |
| 23 |                                  |     |                                                                                                                                                                                                                                                                                                                                                          |          |
| 24 | Blinding (masking)               | 17a | Who will be blinded after assignment to interventions (eg, trial participants, care providers, outcome assessors, data analysts), and how                                                                                                                                                                                                                | NA       |
| 25 |                                  |     |                                                                                                                                                                                                                                                                                                                                                          |          |
| 26 |                                  |     |                                                                                                                                                                                                                                                                                                                                                          |          |
| 27 |                                  | 17b | If blinded, circumstances under which unblinding is permissible, and procedure for revealing a participant's allocated intervention during the trial                                                                                                                                                                                                     | NA       |
| 28 |                                  |     |                                                                                                                                                                                                                                                                                                                                                          |          |
| 29 |                                  |     |                                                                                                                                                                                                                                                                                                                                                          |          |
| 30 |                                  |     |                                                                                                                                                                                                                                                                                                                                                          |          |

### 31 **Methods: Data collection, management, and analysis**

|    |                         |     |                                                                                                                                                                                                                                                                                                                                                                                                              |       |
|----|-------------------------|-----|--------------------------------------------------------------------------------------------------------------------------------------------------------------------------------------------------------------------------------------------------------------------------------------------------------------------------------------------------------------------------------------------------------------|-------|
| 33 | Data collection methods | 18a | Plans for assessment and collection of outcome, baseline, and other trial data, including any related processes to promote data quality (eg, duplicate measurements, training of assessors) and a description of study instruments (eg, questionnaires, laboratory tests) along with their reliability and validity, if known. Reference to where data collection forms can be found, if not in the protocol | 10-14 |
| 34 |                         |     |                                                                                                                                                                                                                                                                                                                                                                                                              |       |
| 35 |                         |     |                                                                                                                                                                                                                                                                                                                                                                                                              |       |
| 36 |                         |     |                                                                                                                                                                                                                                                                                                                                                                                                              |       |
| 37 |                         |     |                                                                                                                                                                                                                                                                                                                                                                                                              |       |
| 38 |                         |     |                                                                                                                                                                                                                                                                                                                                                                                                              |       |
| 39 |                         | 18b | Plans to promote participant retention and complete follow-up, including list of any outcome data to be collected for participants who discontinue or deviate from intervention protocols                                                                                                                                                                                                                    | 3     |
| 40 |                         |     |                                                                                                                                                                                                                                                                                                                                                                                                              |       |
| 41 |                         |     |                                                                                                                                                                                                                                                                                                                                                                                                              |       |
| 42 |                         |     |                                                                                                                                                                                                                                                                                                                                                                                                              |       |

|    |                     |     |                                                                                                                                                                                                                                                                   |        |
|----|---------------------|-----|-------------------------------------------------------------------------------------------------------------------------------------------------------------------------------------------------------------------------------------------------------------------|--------|
| 1  | Data management     | 19  | Plans for data entry, coding, security, and storage, including any related processes to promote data quality (eg, double data entry; range checks for data values). Reference to where details of data management procedures can be found, if not in the protocol | 14, 15 |
| 2  |                     |     |                                                                                                                                                                                                                                                                   |        |
| 3  |                     |     |                                                                                                                                                                                                                                                                   |        |
| 4  |                     |     |                                                                                                                                                                                                                                                                   |        |
| 5  | Statistical methods | 20a | Statistical methods for analysing primary and secondary outcomes. Reference to where other details of the statistical analysis plan can be found, if not in the protocol                                                                                          | 13, 14 |
| 6  |                     |     |                                                                                                                                                                                                                                                                   |        |
| 7  |                     |     |                                                                                                                                                                                                                                                                   |        |
| 8  |                     | 20b | Methods for any additional analyses (eg, subgroup and adjusted analyses)                                                                                                                                                                                          | 13, 14 |
| 9  |                     |     |                                                                                                                                                                                                                                                                   |        |
| 10 |                     | 20c | Definition of analysis population relating to protocol non-adherence (eg, as randomised analysis), and any statistical methods to handle missing data (eg, multiple imputation)                                                                                   | 14     |
| 11 |                     |     |                                                                                                                                                                                                                                                                   |        |
| 12 |                     |     |                                                                                                                                                                                                                                                                   |        |
| 13 |                     |     |                                                                                                                                                                                                                                                                   |        |

14 **Methods: Monitoring**

|    |                 |     |                                                                                                                                                                                                                                                                                                                                       |    |
|----|-----------------|-----|---------------------------------------------------------------------------------------------------------------------------------------------------------------------------------------------------------------------------------------------------------------------------------------------------------------------------------------|----|
| 15 |                 |     |                                                                                                                                                                                                                                                                                                                                       |    |
| 16 | Data monitoring | 21a | Composition of data monitoring committee (DMC); summary of its role and reporting structure; statement of whether it is independent from the sponsor and competing interests; and reference to where further details about its charter can be found, if not in the protocol. Alternatively, an explanation of why a DMC is not needed | 15 |
| 17 |                 |     |                                                                                                                                                                                                                                                                                                                                       |    |
| 18 |                 |     |                                                                                                                                                                                                                                                                                                                                       |    |
| 19 |                 |     |                                                                                                                                                                                                                                                                                                                                       |    |
| 20 |                 |     |                                                                                                                                                                                                                                                                                                                                       |    |
| 21 |                 |     |                                                                                                                                                                                                                                                                                                                                       |    |
| 22 |                 | 21b | Description of any interim analyses and stopping guidelines, including who will have access to these interim results and make the final decision to terminate the trial                                                                                                                                                               | NA |
| 23 |                 |     |                                                                                                                                                                                                                                                                                                                                       |    |
| 24 |                 |     |                                                                                                                                                                                                                                                                                                                                       |    |
| 25 | Harms           | 22  | Plans for collecting, assessing, reporting, and managing solicited and spontaneously reported adverse events and other unintended effects of trial interventions or trial conduct                                                                                                                                                     | 15 |
| 26 |                 |     |                                                                                                                                                                                                                                                                                                                                       |    |
| 27 |                 |     |                                                                                                                                                                                                                                                                                                                                       |    |
| 28 | Auditing        | 23  | Frequency and procedures for auditing trial conduct, if any, and whether the process will be independent from investigators and the sponsor                                                                                                                                                                                           | 15 |
| 29 |                 |     |                                                                                                                                                                                                                                                                                                                                       |    |
| 30 |                 |     |                                                                                                                                                                                                                                                                                                                                       |    |
| 31 |                 |     |                                                                                                                                                                                                                                                                                                                                       |    |

32 **Ethics and dissemination**

|    |                          |    |                                                                                                                                                                                                                                  |       |
|----|--------------------------|----|----------------------------------------------------------------------------------------------------------------------------------------------------------------------------------------------------------------------------------|-------|
| 33 |                          |    |                                                                                                                                                                                                                                  |       |
| 34 | Research ethics approval | 24 | Plans for seeking research ethics committee/institutional review board (REC/IRB) approval                                                                                                                                        | 2, 15 |
| 35 |                          |    |                                                                                                                                                                                                                                  |       |
| 36 |                          |    |                                                                                                                                                                                                                                  |       |
| 37 | Protocol amendments      | 25 | Plans for communicating important protocol modifications (eg, changes to eligibility criteria, outcomes, analyses) to relevant parties (eg, investigators, REC/IRBs, trial participants, trial registries, journals, regulators) | 15    |
| 38 |                          |    |                                                                                                                                                                                                                                  |       |
| 39 |                          |    |                                                                                                                                                                                                                                  |       |
| 40 |                          |    |                                                                                                                                                                                                                                  |       |
| 41 |                          |    |                                                                                                                                                                                                                                  |       |
| 42 |                          |    |                                                                                                                                                                                                                                  |       |

|    |                               |     |                                                                                                                                                                                                                                                                                     |                                                                                 |
|----|-------------------------------|-----|-------------------------------------------------------------------------------------------------------------------------------------------------------------------------------------------------------------------------------------------------------------------------------------|---------------------------------------------------------------------------------|
| 1  | Consent or assent             | 26a | Who will obtain informed consent or assent from potential trial participants or authorised surrogates, and how (see Item 32)                                                                                                                                                        | 22, Fig 1                                                                       |
| 2  |                               |     |                                                                                                                                                                                                                                                                                     |                                                                                 |
| 3  |                               |     |                                                                                                                                                                                                                                                                                     |                                                                                 |
| 4  |                               | 26b | Additional consent provisions for collection and use of participant data and biological specimens in ancillary studies, if applicable                                                                                                                                               | NA                                                                              |
| 5  |                               |     |                                                                                                                                                                                                                                                                                     |                                                                                 |
| 6  |                               |     |                                                                                                                                                                                                                                                                                     |                                                                                 |
| 7  | Confidentiality               | 27  | How personal information about potential and enrolled participants will be collected, shared, and maintained in order to protect confidentiality before, during, and after the trial                                                                                                | 14                                                                              |
| 8  |                               |     |                                                                                                                                                                                                                                                                                     |                                                                                 |
| 9  |                               |     |                                                                                                                                                                                                                                                                                     |                                                                                 |
| 10 | Declaration of interests      | 28  | Financial and other competing interests for principal investigators for the overall trial and each study site                                                                                                                                                                       | 22                                                                              |
| 11 |                               |     |                                                                                                                                                                                                                                                                                     |                                                                                 |
| 12 |                               |     |                                                                                                                                                                                                                                                                                     |                                                                                 |
| 13 | Access to data                | 29  | Statement of who will have access to the final trial dataset, and disclosure of contractual agreements that limit such access for investigators                                                                                                                                     | Contractual agreement is present                                                |
| 14 |                               |     |                                                                                                                                                                                                                                                                                     |                                                                                 |
| 15 |                               |     |                                                                                                                                                                                                                                                                                     |                                                                                 |
| 16 |                               |     |                                                                                                                                                                                                                                                                                     |                                                                                 |
| 17 |                               |     |                                                                                                                                                                                                                                                                                     |                                                                                 |
| 18 | Ancillary and post-trial care | 30  | Provisions, if any, for ancillary and post-trial care, and for compensation to those who suffer harm from trial participation                                                                                                                                                       | Insurance is included in case of harm                                           |
| 19 |                               |     |                                                                                                                                                                                                                                                                                     |                                                                                 |
| 20 |                               |     |                                                                                                                                                                                                                                                                                     |                                                                                 |
| 21 |                               |     |                                                                                                                                                                                                                                                                                     |                                                                                 |
| 22 | Dissemination policy          | 31a | Plans for investigators and sponsor to communicate trial results to participants, healthcare professionals, the public, and other relevant groups (eg, via publication, reporting in results databases, or other data sharing arrangements), including any publication restrictions | 16                                                                              |
| 23 |                               |     |                                                                                                                                                                                                                                                                                     |                                                                                 |
| 24 |                               |     |                                                                                                                                                                                                                                                                                     |                                                                                 |
| 25 |                               |     |                                                                                                                                                                                                                                                                                     |                                                                                 |
| 26 |                               |     |                                                                                                                                                                                                                                                                                     |                                                                                 |
| 27 |                               | 31b | Authorship eligibility guidelines and any intended use of professional writers                                                                                                                                                                                                      | NA                                                                              |
| 28 |                               |     |                                                                                                                                                                                                                                                                                     |                                                                                 |
| 29 |                               | 31c | Plans, if any, for granting public access to the full protocol, participant-level dataset, and statistical code                                                                                                                                                                     | NA                                                                              |
| 30 |                               |     |                                                                                                                                                                                                                                                                                     |                                                                                 |
| 31 | <b>Appendices</b>             |     |                                                                                                                                                                                                                                                                                     |                                                                                 |
| 32 |                               |     |                                                                                                                                                                                                                                                                                     |                                                                                 |
| 33 | Informed consent materials    | 32  | Model consent form and other related documentation given to participants and authorised surrogates                                                                                                                                                                                  | Model provided by Central Committee on Research Involving Human Subjects (CCMO) |
| 34 |                               |     |                                                                                                                                                                                                                                                                                     |                                                                                 |
| 35 |                               |     |                                                                                                                                                                                                                                                                                     |                                                                                 |
| 36 |                               |     |                                                                                                                                                                                                                                                                                     |                                                                                 |
| 37 |                               |     |                                                                                                                                                                                                                                                                                     |                                                                                 |
| 38 |                               |     |                                                                                                                                                                                                                                                                                     |                                                                                 |
| 39 |                               |     |                                                                                                                                                                                                                                                                                     |                                                                                 |
| 40 |                               |     |                                                                                                                                                                                                                                                                                     |                                                                                 |
| 41 |                               |     |                                                                                                                                                                                                                                                                                     |                                                                                 |
| 42 |                               |     |                                                                                                                                                                                                                                                                                     |                                                                                 |
| 43 |                               |     |                                                                                                                                                                                                                                                                                     |                                                                                 |
| 44 |                               |     |                                                                                                                                                                                                                                                                                     |                                                                                 |
| 45 |                               |     |                                                                                                                                                                                                                                                                                     |                                                                                 |
| 46 |                               |     |                                                                                                                                                                                                                                                                                     |                                                                                 |

|   |            |    |                                                                                                           |    |
|---|------------|----|-----------------------------------------------------------------------------------------------------------|----|
| 1 | Biological | 33 | Plans for collection, laboratory evaluation, and storage of biological specimens for genetic or molecular | NA |
| 2 | specimens  |    | analysis in the current trial and for future use in ancillary studies, if applicable                      |    |

---

4 \*It is strongly recommended that this checklist be read in conjunction with the SPIRIT 2013 Explanation & Elaboration for important clarification on the items.  
5 Amendments to the protocol should be tracked and dated. The SPIRIT checklist is copyrighted by the SPIRIT Group under the Creative Commons  
6 [“Attribution-NonCommercial-NoDerivs 3.0 Unported”](#) license.  
7

For peer review only

8  
9  
10  
11  
12  
13  
14  
15  
16  
17  
18  
19  
20  
21  
22  
23  
24  
25  
26  
27  
28  
29  
30  
31  
32  
33  
34  
35  
36  
37  
38  
39  
40  
41  
42  
43  
44  
45  
46

# BMJ Open

## Improving the quality of life of patients with breast cancer-related lymphedema by lymphaticovenous anastomosis (LVA): Study protocol of a multicenter randomized controlled trial.

|                                 |                                                                                                                                                                                                                                                                                                                                                                                                                                                                                                                                                                                                                                                                                                                                                                                                                               |
|---------------------------------|-------------------------------------------------------------------------------------------------------------------------------------------------------------------------------------------------------------------------------------------------------------------------------------------------------------------------------------------------------------------------------------------------------------------------------------------------------------------------------------------------------------------------------------------------------------------------------------------------------------------------------------------------------------------------------------------------------------------------------------------------------------------------------------------------------------------------------|
| Journal:                        | <i>BMJ Open</i>                                                                                                                                                                                                                                                                                                                                                                                                                                                                                                                                                                                                                                                                                                                                                                                                               |
| Manuscript ID                   | bmjopen-2019-035337.R1                                                                                                                                                                                                                                                                                                                                                                                                                                                                                                                                                                                                                                                                                                                                                                                                        |
| Article Type:                   | Protocol                                                                                                                                                                                                                                                                                                                                                                                                                                                                                                                                                                                                                                                                                                                                                                                                                      |
| Date Submitted by the Author:   | 02-Dec-2019                                                                                                                                                                                                                                                                                                                                                                                                                                                                                                                                                                                                                                                                                                                                                                                                                   |
| Complete List of Authors:       | Wolfs, Joost; Maastricht University Medical Centre+, Beugels, Jop; Maastricht University Medical Centre+, Plastic & Reconstructive Surgery<br>Kimman, Merel; Maastricht Universitair Medisch Centrum+, Piatkowski de Grzymala, Andrzej; Maastricht University Medical Centre+, Plastic, Reconstructive, and Hand surgery<br>Heuts, Esther; Maastricht University Medical Centre+, Surgery<br>Keuter, Xavier; Maastricht University Medical Centre+, Plastic, Reconstructive, and Hand surgery<br>Tielemans, Hanneke; Radboudumc, Plastic, Reconstructive & Hand Surgery<br>Ulrich, Dietmar; Radboudumc, Plastic, Reconstructive & Hand Surgery<br>van der Hulst, R; Maastricht University Medical Center, Plastic surgery<br>Qiu, Shan Shan; Maastricht University Medical Centre+, Plastic, Reconstructive, and Hand surgery |
| <b>Primary Subject Heading</b>: | Surgery                                                                                                                                                                                                                                                                                                                                                                                                                                                                                                                                                                                                                                                                                                                                                                                                                       |
| Secondary Subject Heading:      | Dermatology, Surgery                                                                                                                                                                                                                                                                                                                                                                                                                                                                                                                                                                                                                                                                                                                                                                                                          |
| Keywords:                       | PLASTIC & RECONSTRUCTIVE SURGERY, Breast surgery < SURGERY, Plastic & reconstructive surgery < SURGERY                                                                                                                                                                                                                                                                                                                                                                                                                                                                                                                                                                                                                                                                                                                        |
|                                 |                                                                                                                                                                                                                                                                                                                                                                                                                                                                                                                                                                                                                                                                                                                                                                                                                               |

SCHOLARONE™  
Manuscripts



1  
2  
3 **Improving the quality of life of patients with breast cancer-related lymphedema by**  
4 **lymphaticovenous anastomosis (LVA): Study protocol of a multicenter randomized**  
5 **controlled trial.**  
6  
7  
8  
9

10  
11  
12 J.A.G.N. **Wolfs** MD<sup>1</sup>, J. **Beugels** MD<sup>1</sup>, M. **Kimman** PhD<sup>2</sup>, A. **Piatkowski** MD PhD<sup>1</sup>, E.M.

13  
14 **Heuts** MD PhD<sup>3</sup>, X.H.A. **Keuter** MD PhD<sup>1</sup>, H.J.P. **Tielemans** MD<sup>4</sup>, D.J.O. **Ulrich** MD PhD

15  
16  
17 <sup>4</sup>, R.R.W.J. **van der Hulst** MD PhD<sup>1</sup>, S.S. **Qiu** MD PhD<sup>1</sup>.  
18  
19

20  
21  
22 **Author affiliations**  
23

- 24  
25 1 Department of Plastic and Reconstructive Surgery, Maastricht University Medical  
26 Center, Maastricht, The Netherlands  
27  
28 2 Department of Clinical Epidemiology and Medical Technology Assessment,  
29 Maastricht University Medical Center, Maastricht, Netherlands  
30  
31 3 Department of Surgery, Maastricht University Medical Center, Maastricht, The  
32 Netherlands  
33  
34 4 Department of Plastic and Reconstructive Surgery, Radboud University Medical  
35 Center, Nijmegen, The Netherlands  
36  
37  
38  
39  
40  
41  
42  
43  
44

45 **Corresponding author**  
46

47 Shan Shan Qiu, MD PhD  
48

49 Department of Plastic, Reconstructive and Hand surgery  
50

51 Maastricht University Medical Center  
52

53 P. Debyelaan 25, 6229 HX Maastricht, The Netherlands  
54

55 Telephone: (+31) 043-3875474  
56

57 Fax: (+31) 043-3875473  
58

59 Email: shanshan.qiushao@mumc.nl  
60

## Abstract

**Introduction.** Early breast cancer detection and advancements in treatment options have resulted in an increase of breast cancer survivors. An increasing number of women are living with the long-term effects of breast cancer treatment, making the quality of survivorship an increasingly important goal. Breast cancer-related lymphedema (BCRL) is one of the most underestimated complications of breast cancer treatment with a reported incidence of 20%. A microsurgical technique called lymphaticovenous anastomosis (LVA) might be a promising treatment modality for patients with BCRL.

The main objective is to assess whether LVA is more effective than the current standard therapy (conservative treatment) in terms of improvement in quality of life and whether it is cost-effective.

**Methods and analysis.** A multicenter, randomized controlled trial, carried out in two academic and two community hospitals in the Netherlands. The study population includes 120 women over the age of 18 who underwent treatment for breast cancer including axillary treatment (sentinel lymph node biopsy or axillary lymph node dissection) and/or axillary radiotherapy, presenting with an early stage lymphedema of the arm, viable lymphatic vessels, and received at least three months conservative treatment. Sixty participants will undergo the LVA operation and the other sixty will continue their regular conservative treatment, both with a follow-up of 24 months.

The primary outcome is the health-related quality of life. Secondary outcomes are societal costs, QALYs, cost-effectiveness ratio, discontinuation rate of conservative treatment, and excess limb volume.

**Ethics and dissemination.** The study was approved by the Ethics Committee of Maastricht University Medical Center on 19 December 2018 (NL67059.068.18). The results of this study will be disseminated in presentations at academic conferences, publications in peer-reviewed journals, and other news media.

1  
2  
3 **Registration details.** The study is registered in the trial register [www.clinicaltrials.gov](http://www.clinicaltrials.gov) with  
4  
5 number NCT02790021.  
6  
7

## 8 **Strengths and limitations of this study**

9

- 10  
11 - This multicenter RCT compares the lymphaticovenous anastomosis operation with  
12  
13 conservative therapy (the standard care) in patients with breast cancer-related  
14  
15 lymphedema.  
16  
17 - Effectiveness of lymphaticovenous anastomosis is examined in terms of patient-  
18  
19 relevant, clinical, and economic outcomes; health-related quality of life, excess limb  
20  
21 volume, discontinuation rate of conservative treatment, societal costs, and cost-  
22  
23 effectiveness.  
24  
25 - This study contains digital questionnaires and a patient diary with automatic warnings  
26  
27 in case of blank answers to minimize missing data.  
28  
29 - Blinding of patients or researcher is not possible in this study due to visible scars  
30  
31 postoperatively.  
32  
33 - Cost-effectiveness analysis may not be generalizable to other countries.  
34  
35  
36  
37  
38  
39  
40  
41

## 42 **Key words**

43  
44 Breast cancer lymphedema, lymphaticovenous anastomosis, conservative treatment,  
45  
46 randomized controlled trial, quality of life  
47  
48  
49  
50  
51

## 52 **Study title**

53  
54 Long study title: *Improving the quality of life of patients with breast cancer-related*  
55  
56 *lymphedema by lymphaticovenous anastomosis (LVA): Study protocol of a multicenter*  
57  
58 *randomized controlled trial.*  
59  
60

1  
2  
3 Study Acronym: *LYMPH trial*  
4  
5  
6

## 7 **Introduction**

8

9  
10 An increasing number of women survive breast cancer due to advancements in  
11 treatment options. As a result, the number of women living with the long-term effects of  
12 breast cancer treatment grows, making the quality of survivorship more relevant. Between 8-  
13 56% of breast cancer survivors develop arm or shoulder problems such as restricted shoulder  
14 mobility, shoulder pain, and lymphedema (1-6), with one of the most underestimated and  
15 debilitating morbidities of them all being upper limb lymphedema.  
16  
17  
18  
19  
20  
21  
22

23 Up to 70% of the patients who develop breast cancer-related lymphedema (BCRL) do  
24 so within the first two years post-treatment, however, cases have been described of women  
25 developing upper limb lymphedema 20 years or later after initial treatment (7-13). In the  
26 Netherlands, between 7% and 30% of the 14,000 annual patients with invasive breast cancer  
27 will develop lymphedema depending on certain treatment and patient related risk factors (14,  
28 15).  
29  
30  
31  
32  
33  
34  
35  
36

37 The following risk factors are associated with the development (and severity) of  
38 BCRL: the extent of breast/axillary surgery, adjuvant radiation, (neo-)adjuvant chemotherapy,  
39 the number of positive nodes, treatment in dominant limb, and obesity (5, 16-20). Limb  
40 swelling may present with symptoms of heaviness, tightness, pain, and loss of normal arm  
41 function and range of motion. The negative psychological effects brought on by the  
42 impairments of activities in daily life and reduced limb aesthetics constitute an additional  
43 burden and decrease in health-related quality of life (HRQoL) (1, 7, 11, 13, 21). Moreover,  
44 infections of the skin are regularly seen in a severe stadium of lymphedema, such as  
45 erysipelas or cellulitis (2, 8, 21).  
46  
47  
48  
49  
50  
51  
52  
53  
54  
55  
56  
57  
58  
59  
60

*Conservative therapy*

1  
2  
3  
4  
5  
6  
7  
8  
9  
10  
11  
12  
13  
14  
15  
16  
17  
18  
19  
20  
21  
22  
23  
24  
25  
26  
27  
28  
29  
30  
31  
32  
33  
34  
35  
36  
37  
38  
39  
40  
41  
42  
43  
44  
45  
46  
47  
48  
49  
50  
51  
52  
53  
54  
55  
56  
57  
58  
59  
60

Complex decongestive therapy (CDT), currently accepted as the standard treatment for lymphedema, is initially aimed at alleviating symptoms without curative intent, which for most patients means lifelong treatment and a constant reminder of the breast cancer period. CDT includes general skin care, patient education, compression therapy with compression bandages and garment, manual lymphatic drainage, and exercise therapy (14, 22, 23). A systematic review concluded that compression garment in combination with manual lymph drainage induces a significant limb volume reduction of 17 to 60 % (24). Another RCT demonstrated a 29% reduction in excess limb volume with combined conservative therapy (25). However, after reaching maximum limb volume reduction, compression garment are lifelong necessary for the patients to maintain the volume reduction obtained.

#### *Lymphaticovenous anastomosis*

Connections can be made between the lymphatic and venous systems to divert static lymph fluid away from the obstruction site in a technique called lymphaticovenous anastomosis (LVA) (26). Due to advancements, microvascular surgery is more developed and anastomoses in vessels as small as 0.3 mm in diameter are made possible.

Several studies on lymphatic super microsurgery performing LVA are available (26-41). Most of the studies describe results on both upper and lower limb lymphedema and not only secondary lymphedema (27, 34). Nevertheless, studies mention a volume or circumference decrease between 30% and 61%, and positive results on subjective complaints with low incidence or no complications (26-29, 31, 36-39, 41). Furthermore, more than half of the patients eventually were able to discontinue compression garment after an LVA procedure (27, 42).

Many studies have been performed, mostly reporting on a small study population. Furthermore, the majority were retrospective, few were prospective, yet none of them were

1  
2 randomized. Another disadvantage is the heterogeneity of the patient population, assessment  
3 modalities, and inconsistent reporting of outcomes and complications (27, 30, 34).  
4  
5

6  
7 The aim of this multicenter RCT is to examine HRQoL and (cost-)effectiveness of  
8 LVA compared with CDT in a large homogenous group of patients with BCRL.  
9  
10  
11

## 12 13 14 15 **Methods and analysis**

### 16 17 18 19 **Study Design**

20  
21  
22 The LYMPH trial is a multicenter, non-blinded, randomized controlled trial and will  
23 be conducted in the Maastricht University Medical Center, Radboud University Medical  
24 Center, Zuyderland Medical Center, and Canisius-Wilhelmina Hospital in the Netherlands.  
25  
26  
27  
28

29  
30 Enrolment will take place at the outpatient clinics of the participating hospitals. The  
31 inclusion and exclusion criteria are listed in Table 1. A total of 120 women must be recruited  
32 after a period of two years. After inclusion and informed consent, participants will be  
33 randomly assigned to either the LVA or conservative (CDT) group with a 1:1 allocation as per  
34 a computer generated randomization schedule stratified by site using block randomization.  
35  
36  
37  
38  
39  
40  
41  
42  
43  
44  
45  
46  
47  
48  
49  
50  
51  
52  
53  
54  
55  
56  
57  
58  
59  
60  
This computer generated randomization is done within the electronic Case Report Form  
(eCRF) in CASTOR EDC ©. Since only early stage lymphedema patients are included and no  
large imbalances are expected, no stratification for other demographic data are applied.

Blinding is not possible in this study, since the operation scars on the arm are easily  
detectable during the study measurements. However, HRQoL is the primary outcome which is  
examined by a digital standardized questionnaire. The patients only have access to the  
questionnaires and the researcher has no influence on this data. The start date of the study is

November 2018 and the estimated completion date of the study is November 2022. An overview of the study design is shown in Figure 1.

**Table 1** Inclusion and exclusion criteria

---

*Inclusion criteria*

---

- Woman over 18 years old
- Breast cancer treatment with SLNB, ALND, or axillary Rt
- Early stage lymphedema of the arm (stage 1 – 2a on ISL classification) (43)
- Viable lymphatic vessels as determined by ICG lymphography, stage  $\leq 3$  (44)
- At least three months conservative therapy (standard of care)
- Primary breast cancer
- Unilateral disease and treatment
- Informed consent

---

*Exclusion criteria*

---

- History of earlier lymph reconstruction efforts
- Recurrent breast cancer
- Distant breast cancer metastases
- Bilateral lymphedema
- Primary congenital lymphedema

---

*SLNB; Sentinel Lymph Node Biopsy, ALND; Axillary Lymph Node Dissection, Rt; radiotherapy, ISL; International Society of Lymphology, ICG; Indocyanine Green*

**Interventions to be measured**

## Group A: Conservative Therapy

The current standard treatment for BCRL is a combination of different methods of conservative therapy, also known as complex decongestive therapy (CDT) (14). CDT incorporates two stages of treatment. The first treatment phase entails skincare, manual lymphatic drainage (MLD), exercises aimed at improvement of mobility/range of motion in the shoulder, elbow or wrist joints, and compression therapy through bandaging. Most patients already underwent this phase short after the diagnosis of lymphedema. CDT in the second treatment phase is aimed at maintenance of the achieved limb volume/ circumference reduction through compression therapy with therapeutic elastic compression garment for the arm. Skincare, mobility exercises, and MLD is continued in this phase if needed (14, 24). Since CDT aim to alleviate symptoms without curative intent, this treatment is mostly lifelong needed. In this study, the patients are followed for 2 years during their regular conservative treatment.

### *Complex decongestive therapy*

Patients allocated to group A will be referred to one of the following dedicated lymphedema (physical-/skin-) therapy clinics, if not already treated by one, according to their place of residence for continuation of standard conservative therapy. Only standard conservative therapy, as they would have gotten if not participating in this study, will take place in these clinics, no study measurements.

All women in this study group will be treated according to a protocol which is already in use for patients not participating in this study, since it is considered as the best available standard care. To be able to compare the outcomes for the conservative therapy group, a standardized treatment protocol using the standard lymphatic drainage methods applied in the Netherlands and Germany ('Verdonkmethod' and 'Asdonkmethod', respectively), will be



1  
2 used in this study. Ongoing conservative treatment and the frequency is controlled by the skin  
3  
4 therapist. All information regarding conservative treatment is noted in the patient diary.  
5  
6  
7  
8  
9

#### 10 11 12 13 14 Group B: Surgical treatment

##### 15 16 *Lymphaticovenous anastomosis*

17  
18 LVA is a relative minimally invasive registered procedure which can be performed  
19 under local anesthesia. The patient lies comfortable on the operation table and a limb table is  
20 used. The limb is then prepared for surgery.  
21  
22

23  
24 Before making the incision, a mix of bupivacaine (Marcaïne®) and epinephrine (1:100.000) is  
25 injected at the site of incision to achieve local anesthesia and optimal hemostasis.  
26  
27

28  
29 The following steps of the operation are performed using a surgical microscope. Based on the  
30 ICG lymphography mapping, incisions of 1 to 2 cm are made at the predetermined sites.  
31  
32

33  
34 Lymphatic vessels are identified and an anastomosis is performed with a similarly sized  
35 adjacent recipient vein in the subdermal plane. The anastomosis is usually performed in an  
36 end-to-end fashion in case both the lymphatic vessel and vein have approximately the same  
37 caliber (otherwise end-to-side). The end-to-end anastomosis is created with an 11-0 suture.  
38  
39

40  
41 The patency of the LVA is confirmed by direct visual examination under the microscope. On  
42 average 1 to 4 anastomosis are performed in a lymphedematous arm. The superficial wound is  
43 closed using 4-0 Ethilon covered by adhesive plasters and a bandage. The operation length is  
44 approximately two to three hours (29).  
45  
46  
47  
48  
49  
50  
51

##### 52 53 54 55 *Post-operative treatment*

56  
57 From 2 weeks after surgery, when the stitches are removed, patients will be treated  
58 with conservative therapy the same way and in the same frequency as preoperatively (45).  
59  
60

1  
2  
3 After 3 months, the plastic surgeon will determine whether conservative therapy can be  
4 reduced or stopped, depending on the decrease of subjective complaints and swelling of the  
5 arm. The frequency of manual lymphatic drainage will be controlled by the skin therapist and  
6 noted in the patient diary.  
7  
8  
9  
10

11  
12  
13  
14 Follow-up moments for both groups will be at 3, 6, 12, 18, and 24 months. For group  
15 A the follow-up starts from the day of the informed consent signing and for group B from the  
16 day of the surgery.  
17  
18  
19  
20

### 21 22 23 24 **Sample size calculation**

25  
26 We made the following assumptions for the calculation of the sample size to show a  
27 statistically significant and clinically relevant difference in quality of life between treatment  
28 groups at 12 months follow-up as measured with the Lymph-ICF questionnaire:  
29  
30

31  
32 Comparing LVA to conservative treatment, the minimal difference in HRQoL that is  
33 considered as clinically relevant is 15 points (15% decrease on the 0 to 100 scale) on the  
34 Lymph-ICF questionnaire at 12 months follow-up (46).  
35  
36  
37  
38

39  
40 To be able to achieve a power of 80%, a total of 45 patients are needed per treatment group,  
41 when the standard deviation is 25%, using an alpha of 0.05. If a drop-out rate (loss-to-follow-  
42 up and patients with missing data) of 25% is taken into account, a sample size of 60 patients  
43 per study group is required and a total of 120 patients will be randomized.  
44  
45  
46  
47  
48  
49

### 50 51 **Outcomes**

#### 52 53 *Primary outcome*

54  
55 The primary outcome is HRQoL at 12 months follow-up. To assess the effectiveness  
56 of the treatment we will use the Dutch version of the “Lymphedema Functioning, Disability  
57 and Health” (Lymph-ICF) questionnaire. This questionnaire assesses the impairments in  
58  
59  
60

1  
2 function, activity limitations, and participation restrictions of patients with upper limb  
3 lymphedema. It is a validated, disease-specific questionnaire, consisting of 29 items  
4  
5 (questions) across 5 domains. Each item is scored on a VAS ranging from 0 to 100. The total  
6  
7 score on the Lymph-ICF is equal to the sum of the item scores divided by the total number of  
8  
9 answered items. A higher score on the Lymph-ICF indicates more impact in the functioning in  
10  
11 the daily life related to upper limb lymphedema (46).  
12  
13  
14

15  
16 HRQoL will be measured at baseline and 3, 6, 12, 18 and 24 months after informed  
17  
18 consent (Group A), or after surgery (Group B).  
19  
20  
21

### 22 23 *Secondary outcomes*

24  
25 Secondary outcomes are the societal costs, QALYs, incremental cost-effectiveness,  
26  
27 discontinuation of conservative treatment, and excess limb volume. Assessment will be done  
28  
29 at baseline and 3, 6, 12, 18, and 24 months after informed consent (Group A), or after surgery  
30  
31 (Group B).  
32  
33

34  
35 Costs include health care related costs, costs to patients and family, and costs due to  
36  
37 lost productivity. Complete individual level hospital resource use data (e.g. surgical  
38  
39 intervention, diagnostic procedures, hospital admissions, outpatient clinic visits) will be  
40  
41 measured using medical records and provider information systems. Resource use outside the  
42  
43 hospital (e.g. lymphedema therapy, general practitioner visits, out-of-pocket expenses such as  
44  
45 for therapeutic elastic garment and over-the counter drugs, travel costs, and quantities of lost  
46  
47 paid work) will be determined by means of prospective cost diaries as kept by participants.  
48  
49 The cost dairy developed for this study is an adapted version of the MCQ and PCQ (47). The  
50  
51 Dutch manual for costing research will be used to determine prices for each volume of  
52  
53 resource use (48).  
54  
55  
56  
57  
58  
59  
60

1  
2  
3 The EQ-5D-5L is a generic HRQoL measure that can be used to calculate QALYs to  
4 be used in the economic evaluation (49). The EQ-5D is a questionnaire responsive to changes  
5 in health in breast cancer patients after conclusion of treatment (50).  
6  
7

8  
9 The EQ-5D-5L examines a patient's HRQoL on the day of the interview. It consist of  
10 the EQ-5D-5L descriptive system and a Visual Analog Scale (EQ VAS). The descriptive  
11 system comprises five dimensions: mobility, self-care, usual activities, pain/discomfort, and  
12 anxiety/depression. Each dimension has five levels: no problems, slight problems, moderate  
13 problems, severe problems and extreme problems. Responses to the 5 items result in a  
14 patient's health state that can be transformed into an index score representing a HRQoL-  
15 weight, ranging between 0 (death) and 1 (perfect health) (51). These index scores are  
16 combined with length of life to calculate the QALYs. The EQ VAS records the patient's self-  
17 rated health with endpoints labelled 'the best health you can imagine' at the top and 'the worst  
18 health you can imagine' at the bottom.  
19  
20  
21  
22  
23  
24  
25  
26  
27  
28  
29  
30  
31

32 Discontinuation of conservative treatment will be assessed with a patient diary to  
33 record the frequency of treatments received (i.e. skin therapy visits, number of compression  
34 garment, etc.).  
35  
36  
37  
38

39 Lastly, bilateral limb volume measurements will be done using VECTRA 3D imaging  
40 and the water displacement method. The excess limb volume is measured as the difference in  
41 volume between the affected and unaffected limb, which is reported as a percentage of the  
42 volume of the unaffected limb. A relative volume reduction (relative to the unaffected arm) as  
43 well as an absolute volume reduction (volume reduction of the affected arm at next  
44 measurement) will be calculated. The calculated volume will be corrected for the body mass  
45 index and for volume differences between the dominant and non-dominant arm.  
46  
47  
48  
49  
50  
51  
52  
53

54 Besides using the water displacement method, volume measurement will also be done  
55 by arm circumference measurement using tape. Both arms will be measured during every visit  
56  
57  
58  
59  
60

1  
2 at the level of the olecranon, 5 and 10 centimeters proximally, 5 and 10 centimeters distally, at  
3  
4 the level of the wrist, and the dorsum of the hand.  
5  
6

7 In the out-patient clinic, a fluorescent marker, called indocyanine green (ICG) is  
8  
9 injected intracutaneously into the second and fourth finger webspace of the lymphedematous  
10  
11 limb and a so called ICG lymphography is performed in search for viable lymphatic vessels.  
12  
13 This is a technique using near-infrared fluorescence imaging (NIRF). After 0.05 ml of ICG  
14  
15 (5mg/ml) is injected per webspace, a near-infrared camera is used to visualize the lymphatic  
16  
17 vessels. Proximal to the injection sites fluorescent stains are identified. When using the  
18  
19 images as a guide, the lymphatic pathways and the sites for incisions for lymphaticovenous  
20  
21 anastomoses are marked with a pen and a color picture is taken. These color pictures are used  
22  
23 to identify the location when LVA will be performed. NIRF will be done at introduction visit  
24  
25 and after 12 and 24 months.  
26  
27  
28  
29  
30  
31  
32

### 33 **Data analysis**

34  
35 For the HRQoL a paired Student's t-test will be used to evaluate the changes in quality  
36  
37 of life scores and in limb volume measurements between pre-inclusion and the different post-  
38  
39 inclusion periods of time within individuals from the same study group. For each of the  
40  
41 follow-up moments (3, 6, 12, 18 and 24 months) the change in quality of life from baseline  
42  
43 will be compared between groups using the two sample unpaired t-test, to evaluate short- and  
44  
45 long-term treatment effects. If baseline imbalance is present, assessed qualitatively, adjusted  
46  
47 differences per follow-up moment will be computed using linear regression. In addition to  
48  
49 statistical testing per follow-up measurement, a linear mixed-effects model will be used to test  
50  
51 for an overall difference between the two groups. To account for clustering of measurements  
52  
53 at the patient-level, a model with a random intercept and random slope will be used.  
54  
55  
56  
57  
58  
59  
60

### *Economic evaluation*

1  
2  
3 An economic evaluation will be performed alongside the clinical trial to determine the cost-  
4 effectiveness of LVA compared to CDT. The design of the economic evaluation follows the  
5 principles of a cost-utility analysis and adheres to the Dutch guideline for economic  
6 evaluations in health care and the Dutch manual for costing research (52, 53). Outcome  
7 measures for the economic evaluation will be costs, health-related quality of life, and quality  
8 adjusted life years (QALYs). The trial-based evaluation adopts a societal perspective and has  
9 a time horizon of two years.

10  
11  
12 An incremental cost-effectiveness ratio (ICER), i.e. cost per QALY gained, will be  
13 calculated by dividing the difference in costs between the two treatments with the difference  
14 in QALYs. Bootstrapping techniques will be used to summarize the uncertainty in estimates  
15 of incremental costs, effects, and the ICER. In addition, cost-effectiveness acceptability  
16 curves (CEACs) will show the probability that LVA is cost-effective compared to  
17 conservative treatment, given the observed data, for a range of maximum monetary values  
18 that a decision-maker might be willing to pay for a QALY gained.

19  
20  
21 The impact of uncertainty surrounding deterministic parameters (for example prices) on the  
22 ICER will be explored using one-way sensitivity analyses. Results, presented in a tornado  
23 diagram, can help determine which parameters are key drivers of the cost-effectiveness  
24 results. Pre-determined subgroup analyses will address possible variation between patients  
25 (heterogeneity).

26  
27  
28 Missing values will be imputed using mean substitution or multiple imputation, as  
29 appropriate.

## 30 31 32 **Ethics and Dissemination**

### 33 34 35 **Data monitoring**

1  
2  
3 Data will be handled confidentially. Source data will be stored by the investigator in a  
4 locked place. Data of all measurements during follow-up moments, (Serious) Adverse Events  
5 and digital questionnaires including patient cost diary are stored immediately in the online  
6 database of CASTOR EDC ©. The investigator and project leader only have access to this  
7 database with an account with password. Identifying data will be stored in coded form; the  
8 key to the form is known only to the supervisor, the investigator, the Dutch Health Care  
9 Inspectorate (IGJ), the study monitors, and the members of the review committee.  
10  
11  
12  
13  
14  
15  
16  
17  
18  
19

## 20 **Harms**

21  
22  
23 Adverse events (AEs) are defined as any undesirable experience occurring to a subject  
24 during the study, whether or not considered related to the trial procedure. Adverse events  
25 related to the LVA operation or conservative therapy that have a possible impact on the  
26 lymphedema and reported spontaneously by the subject or observed by the investigator or his  
27 staff will be recorded directly in CASTOR EDC ©.  
28  
29  
30  
31  
32  
33  
34

35 The research team will report the serious adverse event (SAEs) through the web portal  
36 *ToetsingOnline* to the accredited METC that approved the protocol, within 7 days of first  
37 knowledge for SAEs that result in death or are life threatening followed by a period of  
38 maximum of 8 days to complete the initial preliminary report. All other SAEs will be reported  
39 within a period of maximum 15 days after the research team has first knowledge of the  
40 serious adverse events.  
41  
42  
43  
44  
45  
46  
47  
48  
49

## 50 **Auditing**

51  
52  
53 Monitoring of the conduct of the study will be done by the Clinical Trial Center  
54 Maastricht on a frequent basis following their protocol as is requested by the Board.  
55  
56  
57  
58  
59  
60

## 60 **Protocol amendments**

1  
2  
3 Any modifications to the protocol which may impact the study will be notified to the  
4 METC that gave a favourable opinion prior to implementation.  
5  
6  
7

### 8 **Patient and public involvement**

9

10  
11 The Dutch Network for Lymphedema and Lipedema (NLNet), and the Patient  
12 Advocacy Group (PAG), a joint initiative from the Breast Cancer Research Group (BOOG) of  
13 the Dutch breast cancer association (BVN), were consulted. They provided feedback from the  
14 patients' perspective on our research protocol, patient participation and implementation plan,  
15 feasibility, patient information sheet, outcome parameters, and the burden for the patients.  
16  
17  
18  
19  
20  
21  
22  
23

### 24 **Ethical considerations**

25

26  
27 This study will be conducted according to the principles of the Declaration of  
28 Helsinki, recently changed in Fortaleza (2013) and in accordance with the Medical Research  
29 Involving Human Subjects Act (WMO). The study was approved by the Ethics Committee of  
30 Maastricht University Medical Center on 19 December 2018 (NL67059.068.18). The study is  
31 registered in the trial register [www.clinicaltrials.gov](http://www.clinicaltrials.gov) with number NCT02790021.  
32  
33  
34  
35  
36  
37  
38  
39

### 40 **Dissemination**

41

42 The results of this study will be disseminated in presentations at academic  
43 conferences, publications in peer-reviewed journals and other news media. Data will be kept  
44 confidential and will not be shared with the public. Requests for data sharing for appropriate  
45 research purposes will be considered on an individual basis after trial completion and after  
46 publication of primary manuscripts.  
47  
48  
49  
50  
51  
52  
53  
54  
55  
56  
57

### 58 **References**

59  
60



- 1  
2  
3 1. Vignes S, Fau-Prudhomot P, Simon L, Sanchez-Brechot ML, Arrault M, Locher F.  
4  
5 Impact of breast cancer-related lymphedema on working women. *Support Care Cancer*. 2019.  
6
- 7 2. Fu MR. Breast cancer-related lymphedema: Symptoms, diagnosis, risk reduction, and  
8  
9 management. *World J Clin Oncol*. 2014;5(3):241-7.  
10
- 11 3. Ahmed RL, Schmitz KH, Prizment AE, Folsom AR. Risk factors for lymphedema in  
12  
13 breast cancer survivors, the Iowa Women's Health Study. *Breast Cancer Res Treat*.  
14  
15 2011;130(3):981-91.  
16
- 17 4. Nesvold IL, Fossa SD, Holm I, Naume B, Dahl AA. Arm/shoulder problems in breast  
18  
19 cancer survivors are associated with reduced health and poorer physical quality of life. *Acta*  
20  
21 *Oncol*. 2010;49(3):347-53.  
22
- 23 5. Ahmed RL, Prizment A, Lazovich D, Schmitz KH, Folsom AR. Lymphedema and  
24  
25 quality of life in breast cancer survivors: the Iowa Women's Health Study. *J Clin Oncol*.  
26  
27 2008;26(35):5689-96.  
28
- 29 6. Engel J, Kerr J, Schlesinger-Raab A, Sauer H, Holzel D. Axilla surgery severely  
30  
31 affects quality of life: results of a 5-year prospective study in breast cancer patients. *Breast*  
32  
33 *Cancer Res Treat*. 2003;79(1):47-57.  
34
- 35 7. Chachaj A, Malyszczak K, Pyszel K, Lukas J, Tarkowski R, Pudelko M, et al.  
36  
37 Physical and psychological impairments of women with upper limb lymphedema following  
38  
39 breast cancer treatment. *Psychooncology*. 2010;19(3):299-305.  
40  
41
- 42 8. DiSipio T, Rye S, Newman B, Hayes S. Incidence of unilateral arm lymphoedema  
43  
44 after breast cancer: a systematic review and meta-analysis. *Lancet Oncol*. 2013;14(6):500-15.  
45
- 46 9. Dominick SA, Natarajan L, Pierce JP, Madanat H, Madlensky L. The psychosocial  
47  
48 impact of lymphedema-related distress among breast cancer survivors in the WHEL Study.  
49  
50 *Psychooncology*. 2014;23(9):1049-56.  
51  
52  
53  
54  
55  
56  
57  
58  
59  
60

10. Fu MR, Ridner SH, Hu SH, Stewart BR, Cormier JN, Armer JM. Psychosocial impact of lymphedema: a systematic review of literature from 2004 to 2011. *Psychooncology*. 2013;22(7):1466-84.
11. Oliveri JM, Day JM, Alfano CM, Herndon JE, 2nd, Katz ML, Bittoni MA, et al. Arm/hand swelling and perceived functioning among breast cancer survivors 12 years post-diagnosis: CALGB 79804. *J Cancer Surviv*. 2008;2(4):233-42.
12. Petrek JA, Senie RT, Peters M, Rosen PP. Lymphedema in a cohort of breast carcinoma survivors 20 years after diagnosis. *Cancer*. 2001;92(6):1368-77.
13. Voogd AC, Ververs JM, Vingerhoets AJ, Roumen RM, Coebergh JW, Crommelin MA. Lymphoedema and reduced shoulder function as indicators of quality of life after axillary lymph node dissection for invasive breast cancer. *Br J Surg*. 2003;90(1):76-81.
14. Venereologie NvvdDe. Richtlijn lymfoedeem. Multidisciplinaire evidence-based richtlijn. [www.lymfoedeem.nl](http://www.lymfoedeem.nl); 2014.
15. Richtlijn mammacarcinoom. 2012.
16. Ashikaga T, Krag DN, Land SR, Julian TB, Anderson SJ, Brown AM, et al. Morbidity results from the NSABP B-32 trial comparing sentinel lymph node dissection versus axillary dissection. *J Surg Oncol*. 2010;102(2):111-8.
17. Coriddi M, Khansa I, Stephens J, Miller M, Boehmler J, Tiwari P. Analysis of factors contributing to severity of breast cancer-related lymphedema. *Ann Plast Surg*. 2015;74(1):22-5.
18. Monleon S, Murta-Nascimento C, Bascuas I, Macia F, Duarte E, Belmonte R. Lymphedema Predictor Factors after Breast Cancer Surgery: A Survival Analysis. *Lymphat Res Biol*. 2015;13(4):268-74.
19. Tsai RJ, Dennis LK, Lynch CF, Snetselaar LG, Zamba GK, Scott-Conner C. The risk of developing arm lymphedema among breast cancer survivors: a meta-analysis of treatment factors. *Ann Surg Oncol*. 2009;16(7):1959-72.

- 1  
2  
3 20. Johnson AR, Kimball S, Epstein S, Recht A, Lin SJ, Lee BT, et al. Lymphedema  
4  
5 Incidence After Axillary Lymph Node Dissection: Quantifying the Impact of Radiation and  
6  
7 the Lymphatic Microsurgical Preventive Healing Approach. *Ann Plast Surg.* 2019;82(4S  
8  
9 Suppl 3):S234-S41.  
10
- 11 21. Grada AA, Phillips TJ. Lymphedema: Pathophysiology and clinical manifestations. *J*  
12  
13 *Am Acad Dermatol.* 2017;77(6):1009-20.  
14
- 15 22. Uzkeser H, Karatay S, Erdemci B, Koc M, Senel K. Efficacy of manual lymphatic  
16  
17 drainage and intermittent pneumatic compression pump use in the treatment of lymphedema  
18  
19 after mastectomy: a randomized controlled trial. *Breast Cancer.* 2015;22(3):300-7.  
20  
21
- 22 23. Vignes S, Porcher R, Arrault M, Dupuy A. Long-term management of breast cancer-  
23  
24 related lymphedema after intensive decongestive physiotherapy. *Breast Cancer Res Treat.*  
25  
26 2007;101(3):285-90.  
27
- 28 24. McNeely ML, Peddle CJ, Yurick JL, Dayes IS, Mackey JR. Conservative and dietary  
29  
30 interventions for cancer-related lymphedema: a systematic review and meta-analysis. *Cancer.*  
31  
32 2011;117(6):1136-48.  
33  
34
- 35 25. Dayes IS, Whelan TJ, Julian JA, Parpia S, Pritchard KI, D'Souza DP, et al.  
36  
37 Randomized trial of decongestive lymphatic therapy for the treatment of lymphedema in  
38  
39 women with breast cancer. *J Clin Oncol.* 2013;31(30):3758-63.  
40  
41
- 42 26. Koshima I, Inagawa K, Urushibara K, Moriguchi T. Supermicrosurgical  
43  
44 lymphaticovenular anastomosis for the treatment of lymphedema in the upper extremities. *J*  
45  
46 *Reconstr Microsurg.* 2000;16(6):437-42.  
47  
48
- 49 27. Basta MN, Gao LL, Wu LC. Operative treatment of peripheral lymphedema: a  
50  
51 systematic meta-analysis of the efficacy and safety of lymphovenous microsurgery and tissue  
52  
53 transplantation. *Plast Reconstr Surg.* 2014;133(4):905-13.  
54  
55
- 56 28. Chang DW. Lymphaticovenular bypass for lymphedema management in breast cancer  
57  
58 patients: a prospective study. *Plast Reconstr Surg.* 2010;126(3):752-8.  
59  
60

- 1  
2  
3 29. Chang DW, Suami H, Skoracki R. A prospective analysis of 100 consecutive  
4 lymphovenous bypass cases for treatment of extremity lymphedema. *Plast Reconstr Surg.*  
5 2013;132(5):1305-14.  
6  
7  
8  
9 30. Damstra RJ, Voesten HG, van Schelven WD, van der Lei B. Lymphatic venous  
10 anastomosis (LVA) for treatment of secondary arm lymphedema. A prospective study of 11  
11 LVA procedures in 10 patients with breast cancer related lymphedema and a critical review of  
12 the literature. *Breast Cancer Res Treat.* 2009;113(2):199-206.  
13  
14  
15  
16  
17 31. Furukawa H, Osawa M, Saito A, Hayashi T, Funayama E, Oyama A, et al.  
18 Microsurgical lymphaticovenous implantation targeting dermal lymphatic backflow using  
19 indocyanine green fluorescence lymphography in the treatment of postmastectomy  
20 lymphedema. *Plast Reconstr Surg.* 2011;127(5):1804-11.  
21  
22  
23  
24  
25  
26  
27 32. Mihara M, Hara H, Hayashi Y, Iida T, Araki J, Yamamoto T, et al. Upper-limb  
28 lymphedema treated aesthetically with lymphaticovenous anastomosis using indocyanine  
29 green lymphography and noncontact vein visualization. *J Reconstr Microsurg.*  
30 2012;28(5):327-32.  
31  
32  
33  
34  
35  
36 33. Nagase T, Gonda K, Inoue K, Higashino T, Fukuda N, Gorai K, et al. Treatment of  
37 lymphedema with lymphaticovenular anastomoses. *Int J Clin Oncol.* 2005;10(5):304-10.  
38  
39  
40  
41 34. Penha TR, Ijsbrandy C, Hendrix NA, Heuts EM, Voogd AC, von Meyenfeldt MF, et  
42 al. Microsurgical techniques for the treatment of breast cancer-related lymphedema: a  
43 systematic review. *J Reconstr Microsurg.* 2013;29(2):99-106.  
44  
45  
46  
47 35. Torrisi JS, Joseph WJ, Ghanta S, Cuzzone DA, Albano NJ, Savetsky IL, et al.  
48 Lymphaticovenous bypass decreases pathologic skin changes in upper extremity breast  
49 cancer-related lymphedema. *Lymphat Res Biol.* 2015;13(1):46-53.  
50  
51  
52  
53 36. Yamamoto Y, Horiuchi K, Sasaki S, Sekido M, Furukawa H, Oyama A, et al. Follow-  
54 up study of upper limb lymphedema patients treated by microsurgical lymphaticovenous  
55 implantation (MLVI) combined with compression therapy. *Microsurgery.* 2003;23(1):21-6.  
56  
57  
58  
59  
60

- 1  
2  
3 37. Cornelissen AJM, Beugels J, Ewalds L, Heuts EM, Keuter XHA, Piatkowski A, et al.  
4  
5 Effect of Lymphaticovenous Anastomosis in Breast Cancer-Related Lymphedema: A Review  
6  
7 of the Literature. *Lymphat Res Biol*. 2018;16(5):426-34.  
8
- 9  
10 38. Winters H, Tielemans HJP, Verhulst AC, Paulus VAA, Slater NJ, Ulrich DJO. The  
11  
12 Long-term Patency of Lymphaticovenular Anastomosis in Breast Cancer-Related  
13  
14 Lymphedema. *Ann Plast Surg*. 2019;82(2):196-200.  
15
- 16  
17 39. Salgarello M, Mangialardi ML, Pino V, Gentileschi S, Visconti G. A Prospective  
18  
19 Evaluation of Health-Related Quality of Life following Lymphaticovenular Anastomosis for  
20  
21 Upper and Lower Extremities Lymphedema. *J Reconstr Microsurg*. 2018;34(9):701-7.  
22
- 23  
24 40. Giacalone G, Yamamoto T. Supermicrosurgical lymphaticovenous anastomosis for a  
25  
26 patient with breast lymphedema secondary to breast cancer treatment. *Microsurgery*.  
27  
28 2017;37(6):680-3.  
29
- 30  
31 41. Cornelissen AJM, Kool M, Lopez Penha TR, Keuter XHA, Piatkowski AA, Heuts E,  
32  
33 et al. Lymphatico-venous anastomosis as treatment for breast cancer-related lymphedema: a  
34  
35 prospective study on quality of life. *Breast Cancer Res Treat*. 2017;163(2):281-6.  
36
- 37  
38 42. Winters H, Tielemans HJP, Hameeteman M, Paulus VAA, Beurskens CH, Slater NJ,  
39  
40 et al. The efficacy of lymphaticovenular anastomosis in breast cancer-related lymphedema.  
41  
42 *Breast Cancer Res Treat*. 2017;165(2):321-7.  
43
- 44  
45 43. Executive C. The Diagnosis and Treatment of Peripheral Lymphedema: 2016  
46  
47 Consensus Document of the International Society of Lymphology. *Lymphology*.  
48  
49 2016;49(4):170-84.  
50
- 51  
52 44. Narushima M, Yamamoto T, Ogata F, Yoshimatsu H, Mihara M, Koshima I.  
53  
54 Indocyanine Green Lymphography Findings in Limb Lymphedema. *J Reconstr Microsurg*.  
55  
56 2016;32(1):72-9.  
57
- 58  
59 45. Masia J, Pons G, Nardulli ML. Combined Surgical Treatment in Breast Cancer-  
60  
61 Related Lymphedema. *J Reconstr Microsurg*. 2016;32(1):16-27.

- 1  
2  
3 46. Devoogdt N, Van Kampen M, Geraerts I, Coremans T, Christiaens MR.  
4  
5 Lymphoedema Functioning, Disability and Health questionnaire (Lymph-ICF): reliability and  
6  
7 validity. *Phys Ther.* 2011;91(6):944-57.  
8  
9  
10 47. Bouwmans Cea. Handleiding iMTA Medical Cost Questionnaire (iMCQ). 2013.  
11  
12 48. Lopez Penha TR, van Roozendaal LM, Smidt ML, Boersma LJ, von Meyenfeldt MF,  
13  
14 Voogd AC, et al. The changing role of axillary treatment in breast cancer: Who will remain at  
15  
16 risk for developing arm morbidity in the future? *Breast.* 2015;24(5):543-7.  
17  
18 49. Herdman M, Gudex C, Lloyd A, Janssen M, Kind P, Parkin D, et al. Development and  
19  
20 preliminary testing of the new five-level version of EQ-5D (EQ-5D-5L). *Qual Life Res.*  
21  
22 2011;20(10):1727-36.  
23  
24  
25 50. Kimman ML, Dirksen CD, Lambin P, Boersma LJ. Responsiveness of the EQ-5D in  
26  
27 breast cancer patients in their first year after treatment. *Health Qual Life Outcomes.*  
28  
29 2009;7:11.  
30  
31  
32 51. Versteegh M VM, Evers MAAS, de Wit GA, Prenger R. Dutch Tariff for the Five-  
33  
34 Level Version of EQ-5D. . *Value in health: the journal of the International Society for*  
35  
36 *Pharmacoeconomics and Outcomes Research.* 2016.  
37  
38  
39 52. Zorginstituut. Kostenhandleiding: Methodologie van kostenonderzoek en  
40  
41 referentieprijzen voor economische evaluaties in de gezondheidszorg. 2015.  
42  
43  
44 53. Zorginstituut. Richtlijn voor het uitvoeren van economische evaluaties in de  
45  
46 gezondheidszorg.; 2015.  
47  
48  
49  
50  
51

## Footnotes

## Author Contributions

1  
2 *JB, AP, EH, DU, RH, and SQ* conceived the study and initiated the study design. *MK* provided  
3  
4 statistical and cost-effectiveness expertise. *JW, XK, HT, DU, RH, and SQ* completed the study  
5  
6 design and protocol. All authors contributed to refinement of the study protocol and approved  
7  
8 the final version.  
9  
10

## 11 12 **Funding**

13  
14  
15  
16 This work was supported by ZonMw, grant number 80-85200-98-91044 and Academic  
17  
18 Hospital of Maastricht (azM).  
19  
20

### 21 22 ZonMw

23  
24 Postbus 93 245

25  
26 2509 AE Den Haag

27  
28 Telefoon 070 349 51 11

29  
30 Fax 070 349 51 00

31  
32 E-mail [info@zonmw.nl](mailto:info@zonmw.nl)  
33  
34  
35  
36  
37

### 38 39 azM

40  
41 Postbus 5800

42  
43 6202 AZ Maastricht

44  
45 Tel: [043 387 6543](tel:0433876543)  
46  
47

## 48 49 **Competing interests**

50  
51  
52 None declared.  
53  
54

## 55 56 **Patient consent for publication**

57  
58  
59 Informed consent will be signed by every participant and obtained by the researcher after  
60  
inclusion.

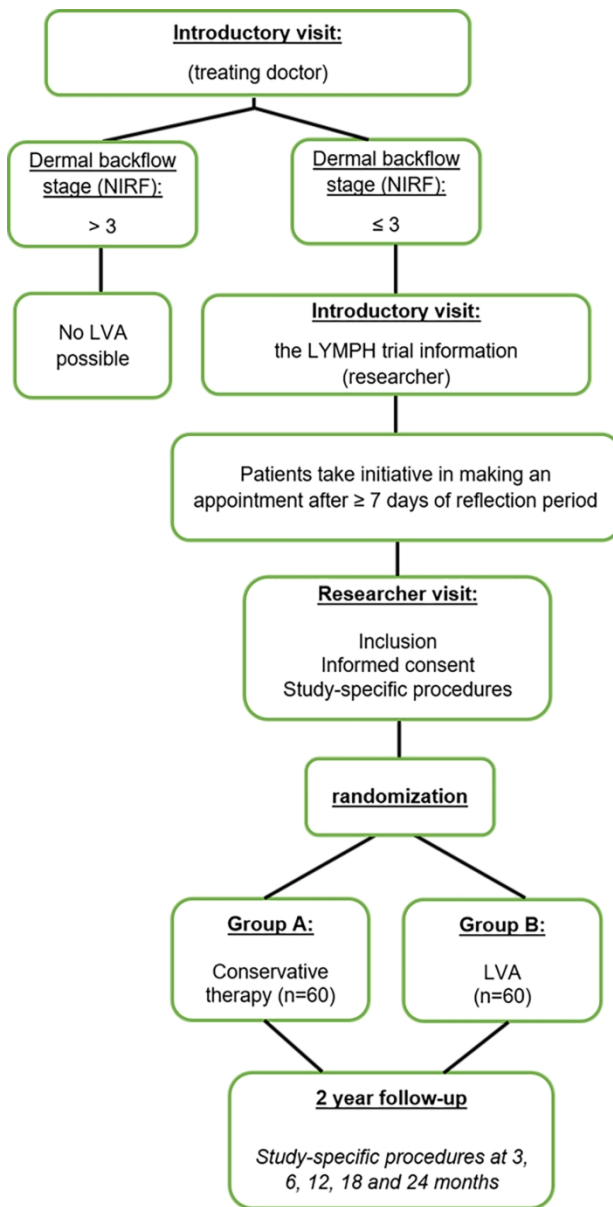

Figure 1 Flowchart: overview of the study design

97x190mm (300 x 300 DPI)



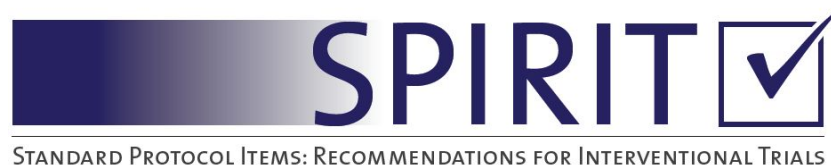

STANDARD PROTOCOL ITEMS: RECOMMENDATIONS FOR INTERVENTIONAL TRIALS

SPIRIT 2013 Checklist: Recommended items to address in a clinical trial protocol and related documents\*

| Section/item                      | Item No | Description                                                                                                                                                                                                                                                                              | Addressed on page number |
|-----------------------------------|---------|------------------------------------------------------------------------------------------------------------------------------------------------------------------------------------------------------------------------------------------------------------------------------------------|--------------------------|
| <b>Administrative information</b> |         |                                                                                                                                                                                                                                                                                          |                          |
| Title                             | 1       | Descriptive title identifying the study design, population, interventions, and, if applicable, trial acronym                                                                                                                                                                             | 1                        |
| Trial registration                | 2a      | Trial identifier and registry name. If not yet registered, name of intended registry                                                                                                                                                                                                     | 3, 16                    |
|                                   | 2b      | All items from the World Health Organization Trial Registration Data Set                                                                                                                                                                                                                 | yes                      |
| Protocol version                  | 3       | Date and version identifier                                                                                                                                                                                                                                                              | V4, 15-04-2019           |
| Funding                           | 4       | Sources and types of financial, material, and other support                                                                                                                                                                                                                              | 22                       |
| Roles and responsibilities        | 5a      | Names, affiliations, and roles of protocol contributors                                                                                                                                                                                                                                  | 1, 21                    |
|                                   | 5b      | Name and contact information for the trial sponsor                                                                                                                                                                                                                                       | 22                       |
|                                   | 5c      | Role of study sponsor and funders, if any, in study design; collection, management, analysis, and interpretation of data; writing of the report; and the decision to submit the report for publication, including whether they will have ultimate authority over any of these activities | NA                       |
|                                   | 5d      | Composition, roles, and responsibilities of the coordinating centre, steering committee, endpoint adjudication committee, data management team, and other individuals or groups overseeing the trial, if applicable (see Item 21a for data monitoring committee)                         | NA                       |

1 **Introduction**

2

3 Background and rationale 6a Description of research question and justification for undertaking the trial, including summary of relevant studies (published and unpublished) examining benefits and harms for each intervention 4-6

4

5

6 6b Explanation for choice of comparators 4-6

7

8 Objectives 7 Specific objectives or hypotheses 6

9

10 Trial design 8 Description of trial design including type of trial (eg, parallel group, crossover, factorial, single group), allocation ratio, and framework (eg, superiority, equivalence, noninferiority, exploratory) 6

11

12

13

14 **Methods: Participants, interventions, and outcomes**

15

16 Study setting 9 Description of study settings (eg, community clinic, academic hospital) and list of countries where data will be collected. Reference to where list of study sites can be obtained 6

17

18

19 Eligibility criteria 10 Inclusion and exclusion criteria for participants. If applicable, eligibility criteria for study centres and individuals who will perform the interventions (eg, surgeons, psychotherapists) 7

20

21

22 Interventions 11a Interventions for each group with sufficient detail to allow replication, including how and when they will be administered 7-9

23

24

25 11b Criteria for discontinuing or modifying allocated interventions for a given trial participant (eg, drug dose change in response to harms, participant request, or improving/worsening disease) NA

26

27

28 11c Strategies to improve adherence to intervention protocols, and any procedures for monitoring adherence (eg, drug tablet return, laboratory tests) NA

29

30

31 11d Relevant concomitant care and interventions that are permitted or prohibited during the trial NA

32

33

34 Outcomes 12 Primary, secondary, and other outcomes, including the specific measurement variable (eg, systolic blood pressure), analysis metric (eg, change from baseline, final value, time to event), method of aggregation (eg, median, proportion), and time point for each outcome. Explanation of the clinical relevance of chosen efficacy and harm outcomes is strongly recommended 10-13

35

36

37

38

39

40 Participant timeline 13 Time schedule of enrolment, interventions (including any run-ins and washouts), assessments, and visits for participants. A schematic diagram is highly recommended (see Figure) 6, Fig 1

41

42

43

44

45

46

|   |             |    |                                                                                                                                                                                       |       |
|---|-------------|----|---------------------------------------------------------------------------------------------------------------------------------------------------------------------------------------|-------|
| 1 | Sample size | 14 | Estimated number of participants needed to achieve study objectives and how it was determined, including clinical and statistical assumptions supporting any sample size calculations | 9, 10 |
| 2 |             |    |                                                                                                                                                                                       |       |
| 3 |             |    |                                                                                                                                                                                       |       |
| 4 | Recruitment | 15 | Strategies for achieving adequate participant enrolment to reach target sample size                                                                                                   | 6     |
| 5 |             |    |                                                                                                                                                                                       |       |

## 6 **Methods: Assignment of interventions (for controlled trials)**

### 7 Allocation:

|    |                                  |     |                                                                                                                                                                                                                                                                                                                                                          |          |
|----|----------------------------------|-----|----------------------------------------------------------------------------------------------------------------------------------------------------------------------------------------------------------------------------------------------------------------------------------------------------------------------------------------------------------|----------|
| 10 | Sequence generation              | 16a | Method of generating the allocation sequence (eg, computer-generated random numbers), and list of any factors for stratification. To reduce predictability of a random sequence, details of any planned restriction (eg, blocking) should be provided in a separate document that is unavailable to those who enrol participants or assign interventions | 6        |
| 11 |                                  |     |                                                                                                                                                                                                                                                                                                                                                          |          |
| 12 |                                  |     |                                                                                                                                                                                                                                                                                                                                                          |          |
| 13 |                                  |     |                                                                                                                                                                                                                                                                                                                                                          |          |
| 14 |                                  |     |                                                                                                                                                                                                                                                                                                                                                          |          |
| 15 |                                  |     |                                                                                                                                                                                                                                                                                                                                                          |          |
| 16 | Allocation concealment mechanism | 16b | Mechanism of implementing the allocation sequence (eg, central telephone; sequentially numbered, opaque, sealed envelopes), describing any steps to conceal the sequence until interventions are assigned                                                                                                                                                | 6        |
| 17 |                                  |     |                                                                                                                                                                                                                                                                                                                                                          |          |
| 18 |                                  |     |                                                                                                                                                                                                                                                                                                                                                          |          |
| 19 |                                  |     |                                                                                                                                                                                                                                                                                                                                                          |          |
| 20 | Implementation                   | 16c | Who will generate the allocation sequence, who will enrol participants, and who will assign participants to interventions                                                                                                                                                                                                                                | 6, Fig 1 |
| 21 |                                  |     |                                                                                                                                                                                                                                                                                                                                                          |          |
| 22 |                                  |     |                                                                                                                                                                                                                                                                                                                                                          |          |
| 23 |                                  |     |                                                                                                                                                                                                                                                                                                                                                          |          |
| 24 | Blinding (masking)               | 17a | Who will be blinded after assignment to interventions (eg, trial participants, care providers, outcome assessors, data analysts), and how                                                                                                                                                                                                                | NA       |
| 25 |                                  |     |                                                                                                                                                                                                                                                                                                                                                          |          |
| 26 |                                  |     |                                                                                                                                                                                                                                                                                                                                                          |          |
| 27 |                                  | 17b | If blinded, circumstances under which unblinding is permissible, and procedure for revealing a participant's allocated intervention during the trial                                                                                                                                                                                                     | NA       |
| 28 |                                  |     |                                                                                                                                                                                                                                                                                                                                                          |          |
| 29 |                                  |     |                                                                                                                                                                                                                                                                                                                                                          |          |
| 30 |                                  |     |                                                                                                                                                                                                                                                                                                                                                          |          |

## 31 **Methods: Data collection, management, and analysis**

|    |                         |     |                                                                                                                                                                                                                                                                                                                                                                                                              |       |
|----|-------------------------|-----|--------------------------------------------------------------------------------------------------------------------------------------------------------------------------------------------------------------------------------------------------------------------------------------------------------------------------------------------------------------------------------------------------------------|-------|
| 33 | Data collection methods | 18a | Plans for assessment and collection of outcome, baseline, and other trial data, including any related processes to promote data quality (eg, duplicate measurements, training of assessors) and a description of study instruments (eg, questionnaires, laboratory tests) along with their reliability and validity, if known. Reference to where data collection forms can be found, if not in the protocol | 10-14 |
| 34 |                         |     |                                                                                                                                                                                                                                                                                                                                                                                                              |       |
| 35 |                         |     |                                                                                                                                                                                                                                                                                                                                                                                                              |       |
| 36 |                         |     |                                                                                                                                                                                                                                                                                                                                                                                                              |       |
| 37 |                         |     |                                                                                                                                                                                                                                                                                                                                                                                                              |       |
| 38 |                         |     |                                                                                                                                                                                                                                                                                                                                                                                                              |       |
| 39 |                         | 18b | Plans to promote participant retention and complete follow-up, including list of any outcome data to be collected for participants who discontinue or deviate from intervention protocols                                                                                                                                                                                                                    | 3     |
| 40 |                         |     |                                                                                                                                                                                                                                                                                                                                                                                                              |       |
| 41 |                         |     |                                                                                                                                                                                                                                                                                                                                                                                                              |       |
| 42 |                         |     |                                                                                                                                                                                                                                                                                                                                                                                                              |       |

|    |                                 |     |                                                                                                                                                                                                                                                                                                                                       |        |
|----|---------------------------------|-----|---------------------------------------------------------------------------------------------------------------------------------------------------------------------------------------------------------------------------------------------------------------------------------------------------------------------------------------|--------|
| 1  | Data management                 | 19  | Plans for data entry, coding, security, and storage, including any related processes to promote data quality (eg, double data entry; range checks for data values). Reference to where details of data management procedures can be found, if not in the protocol                                                                     | 14, 15 |
| 2  |                                 |     |                                                                                                                                                                                                                                                                                                                                       |        |
| 3  |                                 |     |                                                                                                                                                                                                                                                                                                                                       |        |
| 4  |                                 |     |                                                                                                                                                                                                                                                                                                                                       |        |
| 5  | Statistical methods             | 20a | Statistical methods for analysing primary and secondary outcomes. Reference to where other details of the statistical analysis plan can be found, if not in the protocol                                                                                                                                                              | 13, 14 |
| 6  |                                 |     |                                                                                                                                                                                                                                                                                                                                       |        |
| 7  |                                 |     |                                                                                                                                                                                                                                                                                                                                       |        |
| 8  |                                 | 20b | Methods for any additional analyses (eg, subgroup and adjusted analyses)                                                                                                                                                                                                                                                              | 13, 14 |
| 9  |                                 |     |                                                                                                                                                                                                                                                                                                                                       |        |
| 10 |                                 | 20c | Definition of analysis population relating to protocol non-adherence (eg, as randomised analysis), and any statistical methods to handle missing data (eg, multiple imputation)                                                                                                                                                       | 14     |
| 11 |                                 |     |                                                                                                                                                                                                                                                                                                                                       |        |
| 12 |                                 |     |                                                                                                                                                                                                                                                                                                                                       |        |
| 13 |                                 |     |                                                                                                                                                                                                                                                                                                                                       |        |
| 14 | <b>Methods: Monitoring</b>      |     |                                                                                                                                                                                                                                                                                                                                       |        |
| 15 |                                 |     |                                                                                                                                                                                                                                                                                                                                       |        |
| 16 | Data monitoring                 | 21a | Composition of data monitoring committee (DMC); summary of its role and reporting structure; statement of whether it is independent from the sponsor and competing interests; and reference to where further details about its charter can be found, if not in the protocol. Alternatively, an explanation of why a DMC is not needed | 15     |
| 17 |                                 |     |                                                                                                                                                                                                                                                                                                                                       |        |
| 18 |                                 |     |                                                                                                                                                                                                                                                                                                                                       |        |
| 19 |                                 |     |                                                                                                                                                                                                                                                                                                                                       |        |
| 20 |                                 |     |                                                                                                                                                                                                                                                                                                                                       |        |
| 21 |                                 |     |                                                                                                                                                                                                                                                                                                                                       |        |
| 22 |                                 | 21b | Description of any interim analyses and stopping guidelines, including who will have access to these interim results and make the final decision to terminate the trial                                                                                                                                                               | NA     |
| 23 |                                 |     |                                                                                                                                                                                                                                                                                                                                       |        |
| 24 |                                 |     |                                                                                                                                                                                                                                                                                                                                       |        |
| 25 | Harms                           | 22  | Plans for collecting, assessing, reporting, and managing solicited and spontaneously reported adverse events and other unintended effects of trial interventions or trial conduct                                                                                                                                                     | 15     |
| 26 |                                 |     |                                                                                                                                                                                                                                                                                                                                       |        |
| 27 |                                 |     |                                                                                                                                                                                                                                                                                                                                       |        |
| 28 | Auditing                        | 23  | Frequency and procedures for auditing trial conduct, if any, and whether the process will be independent from investigators and the sponsor                                                                                                                                                                                           | 15     |
| 29 |                                 |     |                                                                                                                                                                                                                                                                                                                                       |        |
| 30 |                                 |     |                                                                                                                                                                                                                                                                                                                                       |        |
| 31 |                                 |     |                                                                                                                                                                                                                                                                                                                                       |        |
| 32 | <b>Ethics and dissemination</b> |     |                                                                                                                                                                                                                                                                                                                                       |        |
| 33 |                                 |     |                                                                                                                                                                                                                                                                                                                                       |        |
| 34 | Research ethics approval        | 24  | Plans for seeking research ethics committee/institutional review board (REC/IRB) approval                                                                                                                                                                                                                                             | 2, 15  |
| 35 |                                 |     |                                                                                                                                                                                                                                                                                                                                       |        |
| 36 |                                 |     |                                                                                                                                                                                                                                                                                                                                       |        |
| 37 | Protocol amendments             | 25  | Plans for communicating important protocol modifications (eg, changes to eligibility criteria, outcomes, analyses) to relevant parties (eg, investigators, REC/IRBs, trial participants, trial registries, journals, regulators)                                                                                                      | 15     |
| 38 |                                 |     |                                                                                                                                                                                                                                                                                                                                       |        |
| 39 |                                 |     |                                                                                                                                                                                                                                                                                                                                       |        |
| 40 |                                 |     |                                                                                                                                                                                                                                                                                                                                       |        |
| 41 |                                 |     |                                                                                                                                                                                                                                                                                                                                       |        |
| 42 |                                 |     |                                                                                                                                                                                                                                                                                                                                       |        |

|    |                               |     |                                                                                                                                                                                                                                                                                     |                                                                                 |
|----|-------------------------------|-----|-------------------------------------------------------------------------------------------------------------------------------------------------------------------------------------------------------------------------------------------------------------------------------------|---------------------------------------------------------------------------------|
| 1  | Consent or assent             | 26a | Who will obtain informed consent or assent from potential trial participants or authorised surrogates, and how (see Item 32)                                                                                                                                                        | 22, Fig 1                                                                       |
| 2  |                               |     |                                                                                                                                                                                                                                                                                     |                                                                                 |
| 3  |                               |     |                                                                                                                                                                                                                                                                                     |                                                                                 |
| 4  |                               | 26b | Additional consent provisions for collection and use of participant data and biological specimens in ancillary studies, if applicable                                                                                                                                               | NA                                                                              |
| 5  |                               |     |                                                                                                                                                                                                                                                                                     |                                                                                 |
| 6  |                               |     |                                                                                                                                                                                                                                                                                     |                                                                                 |
| 7  | Confidentiality               | 27  | How personal information about potential and enrolled participants will be collected, shared, and maintained in order to protect confidentiality before, during, and after the trial                                                                                                | 14                                                                              |
| 8  |                               |     |                                                                                                                                                                                                                                                                                     |                                                                                 |
| 9  |                               |     |                                                                                                                                                                                                                                                                                     |                                                                                 |
| 10 | Declaration of interests      | 28  | Financial and other competing interests for principal investigators for the overall trial and each study site                                                                                                                                                                       | 22                                                                              |
| 11 |                               |     |                                                                                                                                                                                                                                                                                     |                                                                                 |
| 12 |                               |     |                                                                                                                                                                                                                                                                                     |                                                                                 |
| 13 | Access to data                | 29  | Statement of who will have access to the final trial dataset, and disclosure of contractual agreements that limit such access for investigators                                                                                                                                     | Contractual agreement is present                                                |
| 14 |                               |     |                                                                                                                                                                                                                                                                                     |                                                                                 |
| 15 |                               |     |                                                                                                                                                                                                                                                                                     |                                                                                 |
| 16 |                               |     |                                                                                                                                                                                                                                                                                     |                                                                                 |
| 17 |                               |     |                                                                                                                                                                                                                                                                                     |                                                                                 |
| 18 | Ancillary and post-trial care | 30  | Provisions, if any, for ancillary and post-trial care, and for compensation to those who suffer harm from trial participation                                                                                                                                                       | Insurance is included in case of harm                                           |
| 19 |                               |     |                                                                                                                                                                                                                                                                                     |                                                                                 |
| 20 |                               |     |                                                                                                                                                                                                                                                                                     |                                                                                 |
| 21 |                               |     |                                                                                                                                                                                                                                                                                     |                                                                                 |
| 22 | Dissemination policy          | 31a | Plans for investigators and sponsor to communicate trial results to participants, healthcare professionals, the public, and other relevant groups (eg, via publication, reporting in results databases, or other data sharing arrangements), including any publication restrictions | 16                                                                              |
| 23 |                               |     |                                                                                                                                                                                                                                                                                     |                                                                                 |
| 24 |                               |     |                                                                                                                                                                                                                                                                                     |                                                                                 |
| 25 |                               |     |                                                                                                                                                                                                                                                                                     |                                                                                 |
| 26 |                               |     |                                                                                                                                                                                                                                                                                     |                                                                                 |
| 27 |                               | 31b | Authorship eligibility guidelines and any intended use of professional writers                                                                                                                                                                                                      | NA                                                                              |
| 28 |                               |     |                                                                                                                                                                                                                                                                                     |                                                                                 |
| 29 |                               | 31c | Plans, if any, for granting public access to the full protocol, participant-level dataset, and statistical code                                                                                                                                                                     | NA                                                                              |
| 30 |                               |     |                                                                                                                                                                                                                                                                                     |                                                                                 |
| 31 | <b>Appendices</b>             |     |                                                                                                                                                                                                                                                                                     |                                                                                 |
| 32 |                               |     |                                                                                                                                                                                                                                                                                     |                                                                                 |
| 33 | Informed consent materials    | 32  | Model consent form and other related documentation given to participants and authorised surrogates                                                                                                                                                                                  | Model provided by Central Committee on Research Involving Human Subjects (CCMO) |
| 34 |                               |     |                                                                                                                                                                                                                                                                                     |                                                                                 |
| 35 |                               |     |                                                                                                                                                                                                                                                                                     |                                                                                 |
| 36 |                               |     |                                                                                                                                                                                                                                                                                     |                                                                                 |
| 37 |                               |     |                                                                                                                                                                                                                                                                                     |                                                                                 |
| 38 |                               |     |                                                                                                                                                                                                                                                                                     |                                                                                 |
| 39 |                               |     |                                                                                                                                                                                                                                                                                     |                                                                                 |
| 40 |                               |     |                                                                                                                                                                                                                                                                                     |                                                                                 |
| 41 |                               |     |                                                                                                                                                                                                                                                                                     |                                                                                 |
| 42 |                               |     |                                                                                                                                                                                                                                                                                     |                                                                                 |
| 43 |                               |     |                                                                                                                                                                                                                                                                                     |                                                                                 |
| 44 |                               |     |                                                                                                                                                                                                                                                                                     |                                                                                 |
| 45 |                               |     |                                                                                                                                                                                                                                                                                     |                                                                                 |
| 46 |                               |     |                                                                                                                                                                                                                                                                                     |                                                                                 |

1 Biological 33 Plans for collection, laboratory evaluation, and storage of biological specimens for genetic or molecular NA  
2 specimens analysis in the current trial and for future use in ancillary studies, if applicable  
3

---

4 \*It is strongly recommended that this checklist be read in conjunction with the SPIRIT 2013 Explanation & Elaboration for important clarification on the items.  
5 Amendments to the protocol should be tracked and dated. The SPIRIT checklist is copyrighted by the SPIRIT Group under the Creative Commons  
6 "[Attribution-NonCommercial-NoDerivs 3.0 Unported](#)" license.  
7  
8  
9  
10  
11  
12  
13  
14  
15  
16  
17  
18  
19  
20  
21  
22  
23  
24  
25  
26  
27  
28  
29  
30  
31  
32  
33  
34  
35  
36  
37  
38  
39  
40  
41  
42  
43  
44  
45  
46

For peer review only

# BMJ Open

## Improving the quality of life of patients with breast cancer-related lymphedema by lymphaticovenous anastomosis (LVA): Study protocol of a multicenter randomized controlled trial.

|                                 |                                                                                                                                                                                                                                                                                                                                                                                                                                                                                                                                                                                                                                                                                                                                                                                                                               |
|---------------------------------|-------------------------------------------------------------------------------------------------------------------------------------------------------------------------------------------------------------------------------------------------------------------------------------------------------------------------------------------------------------------------------------------------------------------------------------------------------------------------------------------------------------------------------------------------------------------------------------------------------------------------------------------------------------------------------------------------------------------------------------------------------------------------------------------------------------------------------|
| Journal:                        | <i>BMJ Open</i>                                                                                                                                                                                                                                                                                                                                                                                                                                                                                                                                                                                                                                                                                                                                                                                                               |
| Manuscript ID                   | bmjopen-2019-035337.R2                                                                                                                                                                                                                                                                                                                                                                                                                                                                                                                                                                                                                                                                                                                                                                                                        |
| Article Type:                   | Protocol                                                                                                                                                                                                                                                                                                                                                                                                                                                                                                                                                                                                                                                                                                                                                                                                                      |
| Date Submitted by the Author:   | 19-Dec-2019                                                                                                                                                                                                                                                                                                                                                                                                                                                                                                                                                                                                                                                                                                                                                                                                                   |
| Complete List of Authors:       | Wolfs, Joost; Maastricht University Medical Centre+, Beugels, Jop; Maastricht University Medical Centre+, Plastic & Reconstructive Surgery<br>Kimman, Merel; Maastricht Universitair Medisch Centrum+, Piatkowski de Grzymala, Andrzej; Maastricht University Medical Centre+, Plastic, Reconstructive, and Hand surgery<br>Heuts, Esther; Maastricht University Medical Centre+, Surgery<br>Keuter, Xavier; Maastricht University Medical Centre+, Plastic, Reconstructive, and Hand surgery<br>Tielemans, Hanneke; Radboudumc, Plastic, Reconstructive & Hand Surgery<br>Ulrich, Dietmar; Radboudumc, Plastic, Reconstructive & Hand Surgery<br>van der Hulst, R; Maastricht University Medical Center, Plastic surgery<br>Qiu, Shan Shan; Maastricht University Medical Centre+, Plastic, Reconstructive, and Hand surgery |
| <b>Primary Subject Heading</b>: | Surgery                                                                                                                                                                                                                                                                                                                                                                                                                                                                                                                                                                                                                                                                                                                                                                                                                       |
| Secondary Subject Heading:      | Dermatology, Surgery                                                                                                                                                                                                                                                                                                                                                                                                                                                                                                                                                                                                                                                                                                                                                                                                          |
| Keywords:                       | PLASTIC & RECONSTRUCTIVE SURGERY, Breast surgery < SURGERY, Plastic & reconstructive surgery < SURGERY                                                                                                                                                                                                                                                                                                                                                                                                                                                                                                                                                                                                                                                                                                                        |
|                                 |                                                                                                                                                                                                                                                                                                                                                                                                                                                                                                                                                                                                                                                                                                                                                                                                                               |

SCHOLARONE™  
Manuscripts

1  
2  
3 **Improving the quality of life of patients with breast cancer-related lymphedema by**  
4 **lymphaticovenous anastomosis (LVA): Study protocol of a multicenter randomized**  
5 **controlled trial.**  
6  
7  
8  
9

10  
11  
12 J.A.G.N. **Wolfs** MD<sup>1</sup>, J. **Beugels** MD<sup>1</sup>, M. **Kimman** PhD<sup>2</sup>, A. **Piatkowski** MD PhD<sup>1</sup>, E.M.

13  
14 **Heuts** MD PhD<sup>3</sup>, X.H.A. **Keuter** MD PhD<sup>1</sup>, H.J.P. **Tielemans** MD<sup>4</sup>, D.J.O. **Ulrich** MD PhD

15  
16  
17 <sup>4</sup>, R.R.W.J. **van der Hulst** MD PhD<sup>1</sup>, S.S. **Qiu** MD PhD<sup>1</sup>.  
18  
19

20  
21  
22 **Author affiliations**  
23

- 24  
25 1 Department of Plastic and Reconstructive Surgery, Maastricht University Medical  
26  
27 Center, Maastricht, The Netherlands  
28  
29 2 Department of Clinical Epidemiology and Medical Technology Assessment,  
30  
31 Maastricht University Medical Center, Maastricht, Netherlands  
32  
33 3 Department of Surgery, Maastricht University Medical Center, Maastricht, The  
34  
35 Netherlands  
36  
37 4 Department of Plastic and Reconstructive Surgery, Radboud University Medical  
38  
39 Center, Nijmegen, The Netherlands  
40  
41  
42  
43  
44

45 **Corresponding author**  
46

47 Shan Shan Qiu, MD PhD  
48

49 Department of Plastic, Reconstructive and Hand surgery  
50

51 Maastricht University Medical Center  
52

53 P. Debyelaan 25, 6229 HX Maastricht, The Netherlands  
54

55 Telephone: (+31) 043-3875474  
56

57 Fax: (+31) 043-3875473  
58

59 Email: shanshan.qiushao@mumc.nl  
60



## Abstract

**Introduction.** Early breast cancer detection and advancements in treatment options have resulted in an increase of breast cancer survivors. An increasing number of women are living with the long-term effects of breast cancer treatment, making the quality of survivorship an increasingly important goal. Breast cancer-related lymphedema (BCRL) is one of the most underestimated complications of breast cancer treatment with a reported incidence of 20%. A microsurgical technique called lymphaticovenous anastomosis (LVA) might be a promising treatment modality for patients with BCRL.

The main objective is to assess whether LVA is more effective than the current standard therapy (conservative treatment) in terms of improvement in quality of life and whether it is cost-effective.

**Methods and analysis.** A multicenter, randomized controlled trial, carried out in two academic and two community hospitals in the Netherlands. The study population includes 120 women over the age of 18 who underwent treatment for breast cancer including axillary treatment (sentinel lymph node biopsy or axillary lymph node dissection) and/or axillary radiotherapy, presenting with an early stage lymphedema of the arm, viable lymphatic vessels, and received at least three months conservative treatment. Sixty participants will undergo the LVA operation and the other sixty will continue their regular conservative treatment, both with a follow-up of 24 months.

The primary outcome is the health-related quality of life. Secondary outcomes are societal costs, QALYs, cost-effectiveness ratio, discontinuation rate of conservative treatment, and excess limb volume.

**Ethics and dissemination.** The study was approved by the Ethics Committee of Maastricht University Medical Center on 19 December 2018 (NL67059.068.18). The results of this study will be disseminated in presentations at academic conferences, publications in peer-reviewed journals, and other news media.

1  
2  
3 **Registration details.** The study is registered in the trial register [www.clinicaltrials.gov](http://www.clinicaltrials.gov) with  
4  
5 number NCT02790021.  
6  
7

## 8 **Strengths and limitations of this study**

9

- 10  
11 - This multicenter RCT compares the lymphaticovenous anastomosis operation with  
12  
13 conservative therapy (the standard care) in patients with breast cancer-related  
14  
15 lymphedema.  
16  
17 - Effectiveness of lymphaticovenous anastomosis is examined in terms of patient-  
18  
19 relevant, clinical, and economic outcomes; health-related quality of life, excess limb  
20  
21 volume, discontinuation rate of conservative treatment, societal costs, and cost-  
22  
23 effectiveness.  
24  
25 - This study contains digital questionnaires and a patient diary with automatic warnings  
26  
27 in case of blank answers to minimize missing data.  
28  
29 - Blinding of patients or researcher is not possible in this study due to visible scars  
30  
31 postoperatively.  
32  
33 - Cost-effectiveness analysis may not be generalizable to other countries.  
34  
35  
36  
37  
38  
39  
40  
41

## 42 **Key words**

43  
44 Breast cancer lymphedema, lymphaticovenous anastomosis, conservative treatment,  
45  
46 randomized controlled trial, quality of life  
47  
48  
49  
50  
51

## 52 **Study title**

53  
54 Long study title: *Improving the quality of life of patients with breast cancer-related*  
55  
56 *lymphedema by lymphaticovenous anastomosis (LVA): Study protocol of a multicenter*  
57  
58 *randomized controlled trial.*  
59  
60

1  
2  
3 Study Acronym: *LYMPH trial*  
4  
5  
6

## 7 **Introduction**

8

9  
10 An increasing number of women survive breast cancer due to advancements in  
11 treatment options. As a result, the number of women living with the long-term effects of  
12 breast cancer treatment grows, making the quality of survivorship more relevant. Between 8-  
13 56% of breast cancer survivors develop arm or shoulder problems such as restricted shoulder  
14 mobility, shoulder pain, and lymphedema (1-6), with one of the most underestimated and  
15 debilitating morbidities of them all being upper limb lymphedema.  
16  
17  
18  
19  
20  
21  
22

23 Up to 70% of the patients who develop breast cancer-related lymphedema (BCRL) do  
24 so within the first two years post-treatment, however, cases have been described of women  
25 developing upper limb lymphedema 20 years or later after initial treatment (7-13). In the  
26 Netherlands, between 7% and 30% of the 14,000 annual patients with invasive breast cancer  
27 will develop lymphedema depending on certain treatment and patient related risk factors (14,  
28 15).  
29  
30  
31  
32  
33  
34  
35  
36

37 The following risk factors are associated with the development (and severity) of  
38 BCRL: the extent of breast/axillary surgery, adjuvant radiation, (neo-)adjuvant chemotherapy,  
39 the number of positive nodes, treatment in dominant limb, and obesity (5, 16-20). Limb  
40 swelling may present with symptoms of heaviness, tightness, pain, and loss of normal arm  
41 function and range of motion. The negative psychological effects brought on by the  
42 impairments of activities in daily life and reduced limb aesthetics constitute an additional  
43 burden and decrease in health-related quality of life (HRQoL) (1, 7, 11, 13, 21). Moreover,  
44 infections of the skin are regularly seen in a severe stadium of lymphedema, such as  
45 erysipelas or cellulitis (2, 8, 21).  
46  
47  
48  
49  
50  
51  
52  
53  
54  
55  
56  
57  
58  
59  
60

*Conservative therapy*

1  
2  
3  
4  
5  
6  
7  
8  
9  
10  
11  
12  
13  
14  
15  
16  
17  
18  
19  
20  
21  
22  
23  
24  
25  
26  
27  
28  
29  
30  
31  
32  
33  
34  
35  
36  
37  
38  
39  
40  
41  
42  
43  
44  
45  
46  
47  
48  
49  
50  
51  
52  
53  
54  
55  
56  
57  
58  
59  
60

Complex decongestive therapy (CDT), currently accepted as the standard treatment for lymphedema, is initially aimed at alleviating symptoms without curative intent, which for most patients means lifelong treatment and a constant reminder of the breast cancer period. CDT includes general skin care, patient education, compression therapy with compression bandages and garment, manual lymphatic drainage, and exercise therapy (14, 22, 23). A systematic review concluded that compression garment in combination with manual lymph drainage induces a significant limb volume reduction of 17 to 60 % (24). Another RCT demonstrated a 29% reduction in excess limb volume with combined conservative therapy (25). However, after reaching maximum limb volume reduction, compression garment are lifelong necessary for the patients to maintain the volume reduction obtained.

#### *Lymphaticovenous anastomosis*

Connections can be made between the lymphatic and venous systems to divert static lymph fluid away from the obstruction site in a technique called lymphaticovenous anastomosis (LVA) (26). Due to advancements, microvascular surgery is more developed and anastomoses in vessels as small as 0.3 mm in diameter are made possible.

Several studies on lymphatic super microsurgery performing LVA are available (26-41). Most of the studies describe results on both upper and lower limb lymphedema and not only secondary lymphedema (27, 34). Nevertheless, studies mention a volume or circumference decrease between 30% and 61%, and positive results on subjective complaints with low incidence or no complications (26-29, 31, 36-39, 41). Furthermore, more than half of the patients eventually were able to discontinue compression garment after an LVA procedure (27, 42).

Many studies have been performed, mostly reporting on a small study population. Furthermore, the majority were retrospective, few were prospective, yet none of them were

1  
2 randomized. Another disadvantage is the heterogeneity of the patient population, assessment  
3 modalities, and inconsistent reporting of outcomes and complications (27, 30, 34).  
4  
5

6  
7 The aim of this multicenter RCT is to examine HRQoL and (cost-)effectiveness of  
8 LVA compared with CDT in a large homogenous group of patients with BCRL.  
9  
10  
11

## 12 13 14 15 **Methods and analysis**

### 16 17 18 19 **Study Design**

20  
21  
22 The LYMPH trial is a multicenter, non-blinded, randomized controlled trial and will  
23 be conducted in the Maastricht University Medical Center, Radboud University Medical  
24 Center, Zuyderland Medical Center, and Canisius-Wilhelmina Hospital in the Netherlands.  
25  
26  
27  
28

29  
30 Enrolment will take place at the outpatient clinics of the participating hospitals. The  
31 inclusion and exclusion criteria are listed in Table 1. A total of 120 women must be recruited  
32 after a period of two years. After inclusion and informed consent, participants will be  
33 randomly assigned to either the LVA or conservative (CDT) group with a 1:1 allocation as per  
34 a computer generated randomization schedule stratified by site using block randomization.  
35  
36  
37  
38  
39  
40  
41  
42  
43  
44  
45  
46  
47  
48  
49  
50  
51  
52  
53  
54  
55  
56  
57  
58  
59  
60  
61  
62  
63  
64  
65  
66  
67  
68  
69  
70  
71  
72  
73  
74  
75  
76  
77  
78  
79  
80  
81  
82  
83  
84  
85  
86  
87  
88  
89  
90  
91  
92  
93  
94  
95  
96  
97  
98  
99  
100  
101  
102  
103  
104  
105  
106  
107  
108  
109  
110  
111  
112  
113  
114  
115  
116  
117  
118  
119  
120  
121  
122  
123  
124  
125  
126  
127  
128  
129  
130  
131  
132  
133  
134  
135  
136  
137  
138  
139  
140  
141  
142  
143  
144  
145  
146  
147  
148  
149  
150  
151  
152  
153  
154  
155  
156  
157  
158  
159  
160  
161  
162  
163  
164  
165  
166  
167  
168  
169  
170  
171  
172  
173  
174  
175  
176  
177  
178  
179  
180  
181  
182  
183  
184  
185  
186  
187  
188  
189  
190  
191  
192  
193  
194  
195  
196  
197  
198  
199  
200  
201  
202  
203  
204  
205  
206  
207  
208  
209  
210  
211  
212  
213  
214  
215  
216  
217  
218  
219  
220  
221  
222  
223  
224  
225  
226  
227  
228  
229  
230  
231  
232  
233  
234  
235  
236  
237  
238  
239  
240  
241  
242  
243  
244  
245  
246  
247  
248  
249  
250  
251  
252  
253  
254  
255  
256  
257  
258  
259  
260  
261  
262  
263  
264  
265  
266  
267  
268  
269  
270  
271  
272  
273  
274  
275  
276  
277  
278  
279  
280  
281  
282  
283  
284  
285  
286  
287  
288  
289  
290  
291  
292  
293  
294  
295  
296  
297  
298  
299  
300  
301  
302  
303  
304  
305  
306  
307  
308  
309  
310  
311  
312  
313  
314  
315  
316  
317  
318  
319  
320  
321  
322  
323  
324  
325  
326  
327  
328  
329  
330  
331  
332  
333  
334  
335  
336  
337  
338  
339  
340  
341  
342  
343  
344  
345  
346  
347  
348  
349  
350  
351  
352  
353  
354  
355  
356  
357  
358  
359  
360  
361  
362  
363  
364  
365  
366  
367  
368  
369  
370  
371  
372  
373  
374  
375  
376  
377  
378  
379  
380  
381  
382  
383  
384  
385  
386  
387  
388  
389  
390  
391  
392  
393  
394  
395  
396  
397  
398  
399  
400  
401  
402  
403  
404  
405  
406  
407  
408  
409  
410  
411  
412  
413  
414  
415  
416  
417  
418  
419  
420  
421  
422  
423  
424  
425  
426  
427  
428  
429  
430  
431  
432  
433  
434  
435  
436  
437  
438  
439  
440  
441  
442  
443  
444  
445  
446  
447  
448  
449  
450  
451  
452  
453  
454  
455  
456  
457  
458  
459  
460  
461  
462  
463  
464  
465  
466  
467  
468  
469  
470  
471  
472  
473  
474  
475  
476  
477  
478  
479  
480  
481  
482  
483  
484  
485  
486  
487  
488  
489  
490  
491  
492  
493  
494  
495  
496  
497  
498  
499  
500  
501  
502  
503  
504  
505  
506  
507  
508  
509  
510  
511  
512  
513  
514  
515  
516  
517  
518  
519  
520  
521  
522  
523  
524  
525  
526  
527  
528  
529  
530  
531  
532  
533  
534  
535  
536  
537  
538  
539  
540  
541  
542  
543  
544  
545  
546  
547  
548  
549  
550  
551  
552  
553  
554  
555  
556  
557  
558  
559  
560  
561  
562  
563  
564  
565  
566  
567  
568  
569  
570  
571  
572  
573  
574  
575  
576  
577  
578  
579  
580  
581  
582  
583  
584  
585  
586  
587  
588  
589  
590  
591  
592  
593  
594  
595  
596  
597  
598  
599  
600  
601  
602  
603  
604  
605  
606  
607  
608  
609  
610  
611  
612  
613  
614  
615  
616  
617  
618  
619  
620  
621  
622  
623  
624  
625  
626  
627  
628  
629  
630  
631  
632  
633  
634  
635  
636  
637  
638  
639  
640  
641  
642  
643  
644  
645  
646  
647  
648  
649  
650  
651  
652  
653  
654  
655  
656  
657  
658  
659  
660  
661  
662  
663  
664  
665  
666  
667  
668  
669  
670  
671  
672  
673  
674  
675  
676  
677  
678  
679  
680  
681  
682  
683  
684  
685  
686  
687  
688  
689  
690  
691  
692  
693  
694  
695  
696  
697  
698  
699  
700  
701  
702  
703  
704  
705  
706  
707  
708  
709  
710  
711  
712  
713  
714  
715  
716  
717  
718  
719  
720  
721  
722  
723  
724  
725  
726  
727  
728  
729  
730  
731  
732  
733  
734  
735  
736  
737  
738  
739  
740  
741  
742  
743  
744  
745  
746  
747  
748  
749  
750  
751  
752  
753  
754  
755  
756  
757  
758  
759  
760  
761  
762  
763  
764  
765  
766  
767  
768  
769  
770  
771  
772  
773  
774  
775  
776  
777  
778  
779  
780  
781  
782  
783  
784  
785  
786  
787  
788  
789  
790  
791  
792  
793  
794  
795  
796  
797  
798  
799  
800  
801  
802  
803  
804  
805  
806  
807  
808  
809  
810  
811  
812  
813  
814  
815  
816  
817  
818  
819  
820  
821  
822  
823  
824  
825  
826  
827  
828  
829  
830  
831  
832  
833  
834  
835  
836  
837  
838  
839  
840  
841  
842  
843  
844  
845  
846  
847  
848  
849  
850  
851  
852  
853  
854  
855  
856  
857  
858  
859  
860  
861  
862  
863  
864  
865  
866  
867  
868  
869  
870  
871  
872  
873  
874  
875  
876  
877  
878  
879  
880  
881  
882  
883  
884  
885  
886  
887  
888  
889  
890  
891  
892  
893  
894  
895  
896  
897  
898  
899  
900  
901  
902  
903  
904  
905  
906  
907  
908  
909  
910  
911  
912  
913  
914  
915  
916  
917  
918  
919  
920  
921  
922  
923  
924  
925  
926  
927  
928  
929  
930  
931  
932  
933  
934  
935  
936  
937  
938  
939  
940  
941  
942  
943  
944  
945  
946  
947  
948  
949  
950  
951  
952  
953  
954  
955  
956  
957  
958  
959  
960  
961  
962  
963  
964  
965  
966  
967  
968  
969  
970  
971  
972  
973  
974  
975  
976  
977  
978  
979  
980  
981  
982  
983  
984  
985  
986  
987  
988  
989  
990  
991  
992  
993  
994  
995  
996  
997  
998  
999  
1000

1  
2  
3 November 2018 and the estimated completion date of the study is November 2022. An  
4  
5 overview of the study design is shown in Figure 1.  
6  
7  
8  
9  
10

11 **Table 1** Inclusion and exclusion criteria  
12

13  
14 *Inclusion criteria*  
15

- 16  
17 - Woman over 18 years old  
18  
19 - Breast cancer treatment with SLNB, ALND, or axillary Rt  
20  
21 - Early stage lymphedema of the arm (stage 1 – 2a on ISL classification) (43)  
22  
23 - Viable lymphatic vessels as determined by ICG lymphography, stage  $\leq 3$  (44)  
24  
25 - At least three months conservative therapy (standard of care)  
26  
27 - Primary breast cancer  
28  
29 - Unilateral disease and treatment  
30  
31 - Informed consent  
32  
33

34  
35 *Exclusion criteria*  
36

- 37  
38 - History of earlier lymph reconstruction efforts  
39  
40 - Recurrent breast cancer  
41  
42 - Distant breast cancer metastases  
43  
44 - Bilateral lymphedema  
45  
46 - Primary congenital lymphedema  
47  
48

49 *SLNB; Sentinel Lymph Node Biopsy, ALND; Axillary Lymph Node Dissection, Rt;*  
50  
51 *radiotherapy, ISL; International Society of Lymphology, ICG; Indocyanine Green*  
52  
53  
54  
55  
56  
57

58 **Interventions to be measured**  
59  
60

## Group A: Conservative Therapy

The current standard treatment for BCRL is a combination of different methods of conservative therapy, also known as complex decongestive therapy (CDT) (14). CDT incorporates two stages of treatment. The first treatment phase entails skincare, manual lymphatic drainage (MLD), exercises aimed at improvement of mobility/range of motion in the shoulder, elbow or wrist joints, and compression therapy through bandaging. Most patients already underwent this phase short after the diagnosis of lymphedema. CDT in the second treatment phase is aimed at maintenance of the achieved limb volume/ circumference reduction through compression therapy with therapeutic elastic compression garment for the arm. Skincare, mobility exercises, and MLD is continued in this phase if needed (14, 24). Since CDT aim to alleviate symptoms without curative intent, this treatment is mostly lifelong needed. In this study, the patients are followed for 2 years during their regular conservative treatment.

### *Complex decongestive therapy*

Patients allocated to group A will be referred to one of the following dedicated lymphedema (physical-/skin-) therapy clinics, if not already treated by one, according to their place of residence for continuation of standard conservative therapy. Only standard conservative therapy, as they would have gotten if not participating in this study, will take place in these clinics, no study measurements.

All women in this study group will be treated according to a protocol which is already in use for patients not participating in this study, since it is considered as the best available standard care. To be able to compare the outcomes for the conservative therapy group, a standardized treatment protocol using the standard lymphatic drainage methods applied in the Netherlands and Germany ('Verdonkmethod' and 'Asdonkmethod', respectively), will be used in this study. See the Supplementary Data for the CDT protocol. Ongoing conservative

1  
2 treatment and the frequency is controlled by the skin therapist. All information regarding  
3 conservative treatment is noted in the patient diary.  
4  
5  
6  
7  
8

### 9 Group B: Surgical treatment

#### 10 *Lymphaticovenous anastomosis*

11  
12 LVA is a relative minimally invasive registered procedure which can be performed  
13 under local anesthesia. The patient lies comfortable on the operation table and a limb table is  
14 used. The limb is then prepared for surgery.  
15  
16

17 Before making the incision, a mix of bupivacaine (Marcaïne®) and epinephrine (1:100.000) is  
18 injected at the site of incision to achieve local anesthesia and optimal hemostasis.  
19  
20

21 The following steps of the operation are performed using a surgical microscope. Based on the  
22 ICG lymphography mapping, incisions of 1 to 2 cm are made at the predetermined sites.  
23  
24

25 Lymphatic vessels are identified and an anastomosis is performed with a similarly sized  
26 adjacent recipient vein in the subdermal plane. The anastomosis is usually performed in an  
27 end-to-end fashion in case both the lymphatic vessel and vein have approximately the same  
28 caliber (otherwise end-to-side). The end-to-end anastomosis is created with an 11-0 suture.  
29  
30

31 The patency of the LVA is confirmed by direct visual examination under the microscope. On  
32 average 1 to 4 anastomosis are performed in a lymphedematous arm. The superficial wound is  
33 closed using 4-0 Ethilon covered by adhesive plasters and a bandage. The operation length is  
34 approximately two to three hours (29).  
35  
36  
37  
38  
39

#### 40 *Postoperative treatment*

41 From 2 weeks after surgery, when the stitches are removed, patients will be treated  
42 with conservative therapy the same way and in the same frequency as preoperatively (45).  
43  
44

45 The participants are treated by the same method as group A if needed, as described in phase 2  
46 (maintenance phase) of the CDT protocol. After 3 months, the plastic surgeon will determine  
47  
48  
49  
50  
51  
52  
53  
54  
55  
56  
57  
58  
59  
60



1  
2  
3 whether conservative therapy can be reduced or stopped, depending on the decrease of  
4  
5 subjective complaints and swelling of the arm. The frequency of manual lymphatic drainage  
6  
7 will be controlled by the skin therapist and noted in the patient diary.  
8  
9

10  
11 Follow-up moments for both groups will be at 3, 6, 12, 18, and 24 months. For group  
12  
13 A the follow-up starts from the day of the informed consent signing and for group B from the  
14  
15 day of the surgery.  
16  
17

### 21 22 **Sample size calculation**

23  
24 We made the following assumptions for the calculation of the sample size to show a  
25  
26 statistically significant and clinically relevant difference in quality of life between treatment  
27  
28 groups at 12 months follow-up as measured with the Lymph-ICF questionnaire:  
29

30  
31 Comparing LVA to conservative treatment, the minimal difference in HRQoL that is  
32  
33 considered as clinically relevant is 15 points (15% decrease on the 0 to 100 scale) on the  
34  
35 Lymph-ICF questionnaire at 12 months follow-up (46).  
36

37  
38 To be able to achieve a power of 80%, a total of 45 patients are needed per treatment group,  
39  
40 when the standard deviation is 25%, using an alpha of 0.05. If a drop-out rate (loss-to-follow-  
41  
42 up and patients with missing data) of 25% is taken into account, a sample size of 60 patients  
43  
44 per study group is required and a total of 120 patients will be randomized.  
45  
46

### 47 48 **Outcomes**

#### 49 50 51 *Primary outcome*

52  
53 The primary outcome is HRQoL at 12 months follow-up. To assess the effectiveness  
54  
55 of the treatment we will use the Dutch version of the “Lymphedema Functioning, Disability  
56  
57 and Health” (Lymph-ICF) questionnaire. This questionnaire assesses the impairments in  
58  
59 function, activity limitations, and participation restrictions of patients with upper limb  
60

1  
2 lymphedema. It is a validated, disease-specific questionnaire, consisting of 29 items  
3  
4 (questions) across 5 domains. Each item is scored on a VAS ranging from 0 to 100. The total  
5  
6 score on the Lymph-ICF is equal to the sum of the item scores divided by the total number of  
7  
8 answered items. A higher score on the Lymph-ICF indicates more impact in the functioning in  
9  
10 the daily life related to upper limb lymphedema (46).  
11  
12

13  
14 HRQoL will be measured at baseline and 3, 6, 12, 18 and 24 months after informed  
15  
16 consent (Group A), or after surgery (Group B).  
17  
18

### 19 20 21 *Secondary outcomes*

22  
23 Secondary outcomes are the societal costs, QALYs, incremental cost-effectiveness,  
24  
25 discontinuation of conservative treatment, and excess limb volume. Assessment will be done  
26  
27 at baseline and 3, 6, 12, 18, and 24 months after informed consent (Group A), or after surgery  
28  
29 (Group B).  
30  
31

32  
33 Costs include health care related costs, costs to patients and family, and costs due to  
34  
35 lost productivity. Complete individual level hospital resource use data (e.g. surgical  
36  
37 intervention, diagnostic procedures, hospital admissions, outpatient clinic visits) will be  
38  
39 measured using medical records and provider information systems. Resource use outside the  
40  
41 hospital (e.g. lymphedema therapy, general practitioner visits, out-of-pocket expenses such as  
42  
43 for therapeutic elastic garment and over-the counter drugs, travel costs, and quantities of lost  
44  
45 paid work) will be determined by means of prospective cost diaries as kept by participants.  
46  
47 The cost diary developed for this study is an adapted version of the MCQ and PCQ (47). The  
48  
49 Dutch manual for costing research will be used to determine prices for each volume of  
50  
51 resource use (48).  
52  
53

54  
55 The EQ-5D-5L is a generic HRQoL measure that can be used to calculate QALYs to  
56  
57 be used in the economic evaluation (49). The EQ-5D is a questionnaire responsive to changes  
58  
59 in health in breast cancer patients after conclusion of treatment (50).  
60

1  
2  
3 The EQ-5D-5L examines a patient's HRQoL on the day of the interview. It consist of  
4 the EQ-5D-5L descriptive system and a Visual Analog Scale (EQ VAS). The descriptive  
5 system comprises five dimensions: mobility, self-care, usual activities, pain/discomfort, and  
6 anxiety/depression. Each dimension has five levels: no problems, slight problems, moderate  
7 problems, severe problems and extreme problems. Responses to the 5 items result in a  
8 patient's health state that can be transformed into an index score representing a HRQoL-  
9 weight, ranging between 0 (death) and 1 (perfect health) (51). These index scores are  
10 combined with length of life to calculate the QALYs. The EQ VAS records the patient's self-  
11 rated health with endpoints labelled 'the best health you can imagine' at the top and 'the worst  
12 health you can imagine' at the bottom.

13  
14  
15  
16  
17  
18  
19  
20  
21  
22  
23  
24  
25  
26  
27  
28  
29  
30  
31  
32  
33  
34  
35  
36  
37  
38  
39  
40  
41  
42  
43  
44  
45  
46  
47  
48  
49  
50  
51  
52  
53  
54  
55  
56  
57  
58  
59  
60  
Discontinuation of conservative treatment will be assessed with a patient diary to  
record the frequency of treatments received (i.e. skin therapy visits, number of compression  
garment, etc.).

Lastly, bilateral limb volume measurements will be done using VECTRA 3D imaging  
and the water displacement method. The excess limb volume is measured as the difference in  
volume between the affected and unaffected limb, which is reported as a percentage of the  
volume of the unaffected limb. A relative volume reduction (relative to the unaffected arm) as  
well as an absolute volume reduction (volume reduction of the affected arm at next  
measurement) will be calculated. The calculated volume will be corrected for the body mass  
index and for volume differences between the dominant and non-dominant arm.

Besides using the water displacement method, volume measurement will also be done  
by arm circumference measurement using tape. Both arms will be measured during every visit  
at the level of the olecranon, 5 and 10 centimeters proximally, 5 and 10 centimeters distally, at  
the level of the wrist, and the dorsum of the hand.

In the out-patient clinic, a fluorescent marker, called indocyanine green (ICG) is  
injected intracutaneously into the second and fourth finger webspace of the lymphedematous

1  
2 limb and a so called ICG lymphography is performed in search for viable lymphatic vessels.  
3  
4 This is a technique using near-infrared fluorescence imaging (NIRF). After 0.05 ml of ICG  
5  
6 (5mg/ml) is injected per webspace, a near-infrared camera is used to visualize the lymphatic  
7  
8 vessels. Proximal to the injection sites fluorescent stains are identified. When using the  
9  
10 images as a guide, the lymphatic pathways and the sites for incisions for lymphaticovenous  
11  
12 anastomoses are marked with a pen and a color picture is taken. These color pictures are used  
13  
14 to identify the location when LVA will be performed. NIRF will be done at introduction visit  
15  
16 and after 12 and 24 months.  
17  
18  
19  
20  
21  
22  
23

### 24 **Data analysis**

25  
26 For the HRQoL a paired Student's t-test will be used to evaluate the changes in quality  
27  
28 of life scores and in limb volume measurements between pre-inclusion and the different post-  
29  
30 inclusion periods of time within individuals from the same study group. For each of the  
31  
32 follow-up moments (3, 6, 12, 18 and 24 months) the change in quality of life from baseline  
33  
34 will be compared between groups using the two sample unpaired t-test, to evaluate short- and  
35  
36 long-term treatment effects. If baseline imbalance is present, assessed qualitatively, adjusted  
37  
38 differences per follow-up moment will be computed using linear regression. In addition to  
39  
40 statistical testing per follow-up measurement, a linear mixed-effects model will be used to test  
41  
42 for an overall difference between the two groups. To account for clustering of measurements  
43  
44 at the patient-level, a model with a random intercept and random slope will be used.  
45  
46  
47  
48  
49  
50

### 51 *Economic evaluation*

52  
53 An economic evaluation will be performed alongside the clinical trial to determine the cost-  
54  
55 effectiveness of LVA compared to CDT. The design of the economic evaluation follows the  
56  
57 principles of a cost-utility analysis and adheres to the Dutch guideline for economic  
58  
59 evaluations in health care and the Dutch manual for costing research (52, 53). Outcome  
60

1  
2  
3  
4  
5  
6  
7  
8  
9  
10  
11  
12  
13  
14  
15  
16  
17  
18  
19  
20  
21  
22  
23  
24  
25  
26  
27  
28  
29  
30  
31  
32  
33  
34  
35  
36  
37  
38  
39  
40  
41  
42  
43  
44  
45  
46  
47  
48  
49  
50  
51  
52  
53  
54  
55  
56  
57  
58  
59  
60

measures for the economic evaluation will be costs, health-related quality of life, and quality adjusted life years (QALYs). The trial-based evaluation adopts a societal perspective and has a time horizon of two years.

An incremental cost-effectiveness ratio (ICER), i.e. cost per QALY gained, will be calculated by dividing the difference in costs between the two treatments with the difference in QALYs. Bootstrapping techniques will be used to summarize the uncertainty in estimates of incremental costs, effects, and the ICER. In addition, cost-effectiveness acceptability curves (CEACs) will show the probability that LVA is cost-effective compared to conservative treatment, given the observed data, for a range of maximum monetary values that a decision-maker might be willing to pay for a QALY gained.

The impact of uncertainty surrounding deterministic parameters (for example prices) on the ICER will be explored using one-way sensitivity analyses. Results, presented in a tornado diagram, can help determine which parameters are key drivers of the cost-effectiveness results. Pre-determined subgroup analyses will address possible variation between patients (heterogeneity).

Missing values will be imputed using mean substitution or multiple imputation, as appropriate.

## **Ethics and Dissemination**

### **Data monitoring**

Data will be handled confidentially. Source data will be stored by the investigator in a locked place. Data of all measurements during follow-up moments, (Serious) Adverse Events and digital questionnaires including patient cost diary are stored immediately in the online database of CASTOR EDC ©. The investigator and project leader only have access to this

1  
2 database with an account with password. Identifying data will be stored in coded form; the  
3  
4 key to the form is known only to the supervisor, the investigator, the Dutch Health Care  
5  
6 Inspectorate (IGJ), the study monitors, and the members of the review committee.  
7  
8  
9

## 10 **Harms**

11  
12  
13  
14 Adverse events (AEs) are defined as any undesirable experience occurring to a subject  
15  
16 during the study, whether or not considered related to the trial procedure. Adverse events  
17  
18 related to the LVA operation or conservative therapy that have a possible impact on the  
19  
20 lymphedema and reported spontaneously by the subject or observed by the investigator or his  
21  
22 staff will be recorded directly in CASTOR EDC ©.  
23  
24

25  
26 The research team will report the serious adverse event (SAEs) through the web portal  
27  
28 *ToetsingOnline* to the accredited METC that approved the protocol, within 7 days of first  
29  
30 knowledge for SAEs that result in death or are life threatening followed by a period of  
31  
32 maximum of 8 days to complete the initial preliminary report. All other SAEs will be reported  
33  
34 within a period of maximum 15 days after the research team has first knowledge of the  
35  
36 serious adverse events.  
37  
38  
39

## 40 **Auditing**

41  
42  
43  
44 Monitoring of the conduct of the study will be done by the Clinical Trial Center  
45  
46 Maastricht on a frequent basis following their protocol as is requested by the Board.  
47  
48  
49

## 50 **Protocol amendments**

51  
52  
53  
54 Any modifications to the protocol which may impact the study will be notified to the  
55  
56 METC that gave a favourable opinion prior to implementation.  
57  
58  
59

## 60 **Patient and public involvement**

1  
2  
3 The Dutch Network for Lymphedema and Lipedema (NLNet), and the Patient  
4  
5 Advocacy Group (PAG), a joint initiative from the Breast Cancer Research Group (BOOG) of  
6  
7 the Dutch breast cancer association (BVN), were consulted. They provided feedback from the  
8  
9 patients' perspective on our research protocol, patient participation and implementation plan,  
10  
11 feasibility, patient information sheet, outcome parameters, and the burden for the patients.  
12  
13

### 14 15 **Ethical considerations**

16  
17  
18 This study will be conducted according to the principles of the Declaration of  
19  
20 Helsinki, recently changed in Fortaleza (2013) and in accordance with the Medical Research  
21  
22 Involving Human Subjects Act (WMO). The study was approved by the Ethics Committee of  
23  
24 Maastricht University Medical Center on 19 December 2018 (NL67059.068.18). The study is  
25  
26 registered in the trial register [www.clinicaltrials.gov](http://www.clinicaltrials.gov) with number NCT02790021.  
27  
28  
29

### 30 31 **Dissemination**

32  
33 The results of this study will be disseminated in presentations at academic  
34  
35 conferences, publications in peer-reviewed journals and other news media. Data will be kept  
36  
37 confidential and will not be shared with the public. Requests for data sharing for appropriate  
38  
39 research purposes will be considered on an individual basis after trial completion and after  
40  
41 publication of primary manuscripts.  
42  
43  
44  
45  
46  
47  
48  
49

### 50 51 **References**

- 52  
53 1. Vignes S, Fau-Prudhomot P, Simon L, Sanchez-Brechot ML, Arrault M, Locher F.  
54  
55 Impact of breast cancer-related lymphedema on working women. *Support Care Cancer*. 2019.  
56  
57 2. Fu MR. Breast cancer-related lymphedema: Symptoms, diagnosis, risk reduction, and  
58  
59 management. *World J Clin Oncol*. 2014;5(3):241-7.  
60

- 1  
2  
3 3. Ahmed RL, Schmitz KH, Prizment AE, Folsom AR. Risk factors for lymphedema in  
4 breast cancer survivors, the Iowa Women's Health Study. *Breast Cancer Res Treat*.  
5 2011;130(3):981-91.  
6
- 7  
8  
9 4. Nesvold IL, Fossa SD, Holm I, Naume B, Dahl AA. Arm/shoulder problems in breast  
10 cancer survivors are associated with reduced health and poorer physical quality of life. *Acta*  
11 *Oncol*. 2010;49(3):347-53.  
12
- 13  
14  
15 5. Ahmed RL, Prizment A, Lazovich D, Schmitz KH, Folsom AR. Lymphedema and  
16 quality of life in breast cancer survivors: the Iowa Women's Health Study. *J Clin Oncol*.  
17 2008;26(35):5689-96.  
18
- 19  
20  
21 6. Engel J, Kerr J, Schlesinger-Raab A, Sauer H, Holzel D. Axilla surgery severely  
22 affects quality of life: results of a 5-year prospective study in breast cancer patients. *Breast*  
23 *Cancer Res Treat*. 2003;79(1):47-57.  
24
- 25  
26  
27 7. Chachaj A, Malyszczak K, Pyszel K, Lukas J, Tarkowski R, Pudelko M, et al.  
28 Physical and psychological impairments of women with upper limb lymphedema following  
29 breast cancer treatment. *Psychooncology*. 2010;19(3):299-305.  
30
- 31  
32  
33 8. DiSipio T, Rye S, Newman B, Hayes S. Incidence of unilateral arm lymphoedema  
34 after breast cancer: a systematic review and meta-analysis. *Lancet Oncol*. 2013;14(6):500-15.  
35
- 36  
37  
38 9. Dominick SA, Natarajan L, Pierce JP, Madanat H, Madlensky L. The psychosocial  
39 impact of lymphedema-related distress among breast cancer survivors in the WHEL Study.  
40 *Psychooncology*. 2014;23(9):1049-56.  
41
- 42  
43  
44 10. Fu MR, Ridner SH, Hu SH, Stewart BR, Cormier JN, Armer JM. Psychosocial impact  
45 of lymphedema: a systematic review of literature from 2004 to 2011. *Psychooncology*.  
46 2013;22(7):1466-84.  
47
- 48  
49  
50 11. Oliveri JM, Day JM, Alfano CM, Herndon JE, 2nd, Katz ML, Bittoni MA, et al.  
51 Arm/hand swelling and perceived functioning among breast cancer survivors 12 years post-  
52 diagnosis: CALGB 79804. *J Cancer Surviv*. 2008;2(4):233-42.  
53  
54  
55  
56  
57  
58  
59  
60



- 1  
2  
3 12. Petrek JA, Senie RT, Peters M, Rosen PP. Lymphedema in a cohort of breast  
4 carcinoma survivors 20 years after diagnosis. *Cancer*. 2001;92(6):1368-77.
- 5  
6  
7 13. Voogd AC, Ververs JM, Vingerhoets AJ, Roumen RM, Coebergh JW, Crommelin  
8 MA. Lymphoedema and reduced shoulder function as indicators of quality of life after  
9 axillary lymph node dissection for invasive breast cancer. *Br J Surg*. 2003;90(1):76-81.
- 10  
11  
12 14. Venereologie NvvDe. Richtlijn lymfoedeem. Multidisciplinaire evidence-based  
13 richtlijn. [www.lymfoedeem.nl](http://www.lymfoedeem.nl); 2014.
- 14  
15  
16 15. Richtlijn mammacarcinoom. 2012.
- 17  
18  
19 16. Ashikaga T, Krag DN, Land SR, Julian TB, Anderson SJ, Brown AM, et al. Morbidity  
20 results from the NSABP B-32 trial comparing sentinel lymph node dissection versus axillary  
21 dissection. *J Surg Oncol*. 2010;102(2):111-8.
- 22  
23  
24 17. Coriddi M, Khansa I, Stephens J, Miller M, Boehmler J, Tiwari P. Analysis of factors  
25 contributing to severity of breast cancer-related lymphedema. *Ann Plast Surg*. 2015;74(1):22-  
26 5.
- 27  
28  
29 18. Monleon S, Murta-Nascimento C, Bascuas I, Macia F, Duarte E, Belmonte R.  
30 Lymphedema Predictor Factors after Breast Cancer Surgery: A Survival Analysis. *Lymphat*  
31 *Res Biol*. 2015;13(4):268-74.
- 32  
33  
34 19. Tsai RJ, Dennis LK, Lynch CF, Snetselaar LG, Zamba GK, Scott-Conner C. The risk  
35 of developing arm lymphedema among breast cancer survivors: a meta-analysis of treatment  
36 factors. *Ann Surg Oncol*. 2009;16(7):1959-72.
- 37  
38  
39 20. Johnson AR, Kimball S, Epstein S, Recht A, Lin SJ, Lee BT, et al. Lymphedema  
40 Incidence After Axillary Lymph Node Dissection: Quantifying the Impact of Radiation and  
41 the Lymphatic Microsurgical Preventive Healing Approach. *Ann Plast Surg*. 2019;82(4S  
42 Suppl 3):S234-S41.
- 43  
44  
45 21. Grada AA, Phillips TJ. Lymphedema: Pathophysiology and clinical manifestations. *J*  
46 *Am Acad Dermatol*. 2017;77(6):1009-20.

- 1  
2  
3 22. Uzkeser H, Karatay S, Erdemci B, Koc M, Senel K. Efficacy of manual lymphatic  
4 drainage and intermittent pneumatic compression pump use in the treatment of lymphedema  
5 after mastectomy: a randomized controlled trial. *Breast Cancer*. 2015;22(3):300-7.  
6  
7  
8
- 9 23. Vignes S, Porcher R, Arrault M, Dupuy A. Long-term management of breast cancer-  
10 related lymphedema after intensive decongestive physiotherapy. *Breast Cancer Res Treat*.  
11 2007;101(3):285-90.  
12  
13  
14
- 15 24. McNeely ML, Peddle CJ, Yurick JL, Dayes IS, Mackey JR. Conservative and dietary  
16 interventions for cancer-related lymphedema: a systematic review and meta-analysis. *Cancer*.  
17 2011;117(6):1136-48.  
18  
19  
20  
21  
22
- 23 25. Dayes IS, Whelan TJ, Julian JA, Parpia S, Pritchard KI, D'Souza DP, et al.  
24 Randomized trial of decongestive lymphatic therapy for the treatment of lymphedema in  
25 women with breast cancer. *J Clin Oncol*. 2013;31(30):3758-63.  
26  
27  
28  
29
- 30 26. Koshima I, Inagawa K, Urushibara K, Moriguchi T. Supermicrosurgical  
31 lymphaticovenular anastomosis for the treatment of lymphedema in the upper extremities. *J*  
32 *Reconstr Microsurg*. 2000;16(6):437-42.  
33  
34  
35  
36
- 37 27. Basta MN, Gao LL, Wu LC. Operative treatment of peripheral lymphedema: a  
38 systematic meta-analysis of the efficacy and safety of lymphovenous microsurgery and tissue  
39 transplantation. *Plast Reconstr Surg*. 2014;133(4):905-13.  
40  
41  
42  
43
- 44 28. Chang DW. Lymphaticovenular bypass for lymphedema management in breast cancer  
45 patients: a prospective study. *Plast Reconstr Surg*. 2010;126(3):752-8.  
46  
47  
48
- 49 29. Chang DW, Suami H, Skoracki R. A prospective analysis of 100 consecutive  
50 lymphovenous bypass cases for treatment of extremity lymphedema. *Plast Reconstr Surg*.  
51 2013;132(5):1305-14.  
52  
53  
54
- 55 30. Damstra RJ, Voesten HG, van Schelven WD, van der Lei B. Lymphatic venous  
56 anastomosis (LVA) for treatment of secondary arm lymphedema. A prospective study of 11  
57  
58  
59  
60

1  
2  
3 LVA procedures in 10 patients with breast cancer related lymphedema and a critical review of  
4  
5 the literature. *Breast Cancer Res Treat.* 2009;113(2):199-206.

6  
7 31. Furukawa H, Osawa M, Saito A, Hayashi T, Funayama E, Oyama A, et al.  
8  
9 Microsurgical lymphaticovenous implantation targeting dermal lymphatic backflow using  
10  
11 indocyanine green fluorescence lymphography in the treatment of postmastectomy  
12  
13 lymphedema. *Plast Reconstr Surg.* 2011;127(5):1804-11.

14  
15  
16 32. Mihara M, Hara H, Hayashi Y, Iida T, Araki J, Yamamoto T, et al. Upper-limb  
17  
18 lymphedema treated aesthetically with lymphaticovenous anastomosis using indocyanine  
19  
20 green lymphography and noncontact vein visualization. *J Reconstr Microsurg.*  
21  
22 2012;28(5):327-32.

23  
24  
25 33. Nagase T, Gonda K, Inoue K, Higashino T, Fukuda N, Gorai K, et al. Treatment of  
26  
27 lymphedema with lymphaticovenular anastomoses. *Int J Clin Oncol.* 2005;10(5):304-10.

28  
29  
30 34. Penha TR, Ijsbrandy C, Hendrix NA, Heuts EM, Voogd AC, von Meyenfeldt MF, et  
31  
32 al. Microsurgical techniques for the treatment of breast cancer-related lymphedema: a  
33  
34 systematic review. *J Reconstr Microsurg.* 2013;29(2):99-106.

35  
36  
37 35. Torrisi JS, Joseph WJ, Ghanta S, Cuzzzone DA, Albano NJ, Savetsky IL, et al.  
38  
39 Lymphaticovenous bypass decreases pathologic skin changes in upper extremity breast  
40  
41 cancer-related lymphedema. *Lymphat Res Biol.* 2015;13(1):46-53.

42  
43  
44 36. Yamamoto Y, Horiuchi K, Sasaki S, Sekido M, Furukawa H, Oyama A, et al. Follow-  
45  
46 up study of upper limb lymphedema patients treated by microsurgical lymphaticovenous  
47  
48 implantation (MLVI) combined with compression therapy. *Microsurgery.* 2003;23(1):21-6.

49  
50  
51 37. Cornelissen AJM, Beugels J, Ewalds L, Heuts EM, Keuter XHA, Piatkowski A, et al.  
52  
53 Effect of Lymphaticovenous Anastomosis in Breast Cancer-Related Lymphedema: A Review  
54  
55 of the Literature. *Lymphat Res Biol.* 2018;16(5):426-34.

- 1  
2  
3 38. Winters H, Tielemans HJP, Verhulst AC, Paulus VAA, Slater NJ, Ulrich DJO. The  
4 Long-term Patency of Lymphaticovenular Anastomosis in Breast Cancer-Related  
5 Lymphedema. *Ann Plast Surg.* 2019;82(2):196-200.  
6  
7  
8  
9 39. Salgarello M, Mangialardi ML, Pino V, Gentileschi S, Visconti G. A Prospective  
10 Evaluation of Health-Related Quality of Life following Lymphaticovenular Anastomosis for  
11 Upper and Lower Extremities Lymphedema. *J Reconstr Microsurg.* 2018;34(9):701-7.  
12  
13  
14  
15  
16 40. Giacalone G, Yamamoto T. Supermicrosurgical lymphaticovenous anastomosis for a  
17 patient with breast lymphedema secondary to breast cancer treatment. *Microsurgery.*  
18  
19 2017;37(6):680-3.  
20  
21  
22  
23 41. Cornelissen AJM, Kool M, Lopez Penha TR, Keuter XHA, Piatkowski AA, Heuts E,  
24 et al. Lymphatico-venous anastomosis as treatment for breast cancer-related lymphedema: a  
25 prospective study on quality of life. *Breast Cancer Res Treat.* 2017;163(2):281-6.  
26  
27  
28  
29 42. Winters H, Tielemans HJP, Hameeteman M, Paulus VAA, Beurskens CH, Slater NJ,  
30 et al. The efficacy of lymphaticovenular anastomosis in breast cancer-related lymphedema.  
31  
32 *Breast Cancer Res Treat.* 2017;165(2):321-7.  
33  
34  
35  
36 43. Executive C. The Diagnosis and Treatment of Peripheral Lymphedema: 2016  
37 Consensus Document of the International Society of Lymphology. *Lymphology.*  
38  
39 2016;49(4):170-84.  
40  
41  
42  
43 44. Narushima M, Yamamoto T, Ogata F, Yoshimatsu H, Mihara M, Koshima I.  
44 Indocyanine Green Lymphography Findings in Limb Lymphedema. *J Reconstr Microsurg.*  
45  
46 2016;32(1):72-9.  
47  
48  
49  
50 45. Masia J, Pons G, Nardulli ML. Combined Surgical Treatment in Breast Cancer-  
51 Related Lymphedema. *J Reconstr Microsurg.* 2016;32(1):16-27.  
52  
53  
54  
55 46. Devoogdt N, Van Kampen M, Geraerts I, Coremans T, Christiaens MR.  
56 Lymphoedema Functioning, Disability and Health questionnaire (Lymph-ICF): reliability and  
57 validity. *Phys Ther.* 2011;91(6):944-57.  
58  
59  
60

- 1  
2  
3 47. Bouwmans Cea. Handleiding *i*MTA Medical Cost Questionnaire (iMCQ). 2013.
- 4  
5 48. Lopez Penha TR, van Roozendaal LM, Smidt ML, Boersma LJ, von Meyenfeldt MF,  
6  
7 Voogd AC, et al. The changing role of axillary treatment in breast cancer: Who will remain at  
8  
9 risk for developing arm morbidity in the future? *Breast*. 2015;24(5):543-7.
- 10  
11 49. Herdman M, Gudex C, Lloyd A, Janssen M, Kind P, Parkin D, et al. Development and  
12  
13 preliminary testing of the new five-level version of EQ-5D (EQ-5D-5L). *Qual Life Res*.  
14  
15 2011;20(10):1727-36.
- 16  
17 50. Kimman ML, Dirksen CD, Lambin P, Boersma LJ. Responsiveness of the EQ-5D in  
18  
19 breast cancer patients in their first year after treatment. *Health Qual Life Outcomes*.  
20  
21 2009;7:11.
- 22  
23 51. Versteegh M VM, Evers MAAS, de Wit GA, Prenger R. Dutch Tariff for the Five-  
24  
25 Level Version of EQ-5D. . *Value in health: the journal of the International Society for*  
26  
27 *Pharmacoeconomics and Outcomes Research*. 2016.
- 28  
29 52. Zorginstituut. Kostenhandleiding: Methodologie van kostenonderzoek en  
30  
31 referentieprijzen voor economische evaluaties in de gezondheidszorg. 2015.
- 32  
33 53. Zorginstituut. Richtlijn voor het uitvoeren van economische evaluaties in de  
34  
35 gezondheidszorg.; 2015.
- 36  
37  
38  
39  
40  
41  
42  
43  
44  
45

## Footnotes

## Author Contributions

46  
47  
48  
49  
50  
51  
52  
53 *JB, AP, EH, DU, RH, and SQ* conceived the study and initiated the study design. *MK* provided  
54  
55 statistical and cost-effectiveness expertise. *JW, XK, HT, DU, RH, and SQ* completed the study  
56  
57 design and protocol. All authors contributed to refinement of the study protocol and approved  
58  
59 the final version.  
60

**Funding**

This work was supported by ZonMw, grant number 80-85200-98-91044 and Academic Hospital of Maastricht (azM).

**ZonMw**

Postbus 93 245

2509 AE Den Haag

Telefoon 070 349 51 11

Fax 070 349 51 00

E-mail [info@zonmw.nl](mailto:info@zonmw.nl)

**azM**

Postbus 5800

6202 AZ Maastricht

Tel: [043 387 6543](tel:0433876543)

**Competing interests**

None declared.

**Patient consent for publication**

Informed consent will be signed by every participant and obtained by the researcher after inclusion.

1  
2  
3 **Figure Legends**  
4  
5

6 **Figure 1** Flowchart: overview of the study design  
7  
8  
9  
10  
11  
12  
13  
14  
15  
16  
17  
18  
19  
20  
21  
22  
23  
24  
25  
26  
27  
28  
29  
30  
31  
32  
33  
34  
35  
36  
37  
38  
39  
40  
41  
42  
43  
44  
45  
46  
47  
48  
49  
50  
51  
52  
53  
54  
55  
56  
57  
58  
59  
60

For peer review only

1  
2  
3  
4  
5  
6  
7  
8  
9  
10  
11  
12  
13  
14  
15  
16  
17  
18  
19  
20  
21  
22  
23  
24  
25  
26  
27  
28  
29  
30  
31  
32  
33  
34  
35  
36  
37  
38  
39  
40  
41  
42  
43  
44  
45  
46  
47  
48  
49  
50  
51  
52  
53  
54  
55  
56  
57  
58  
59  
60

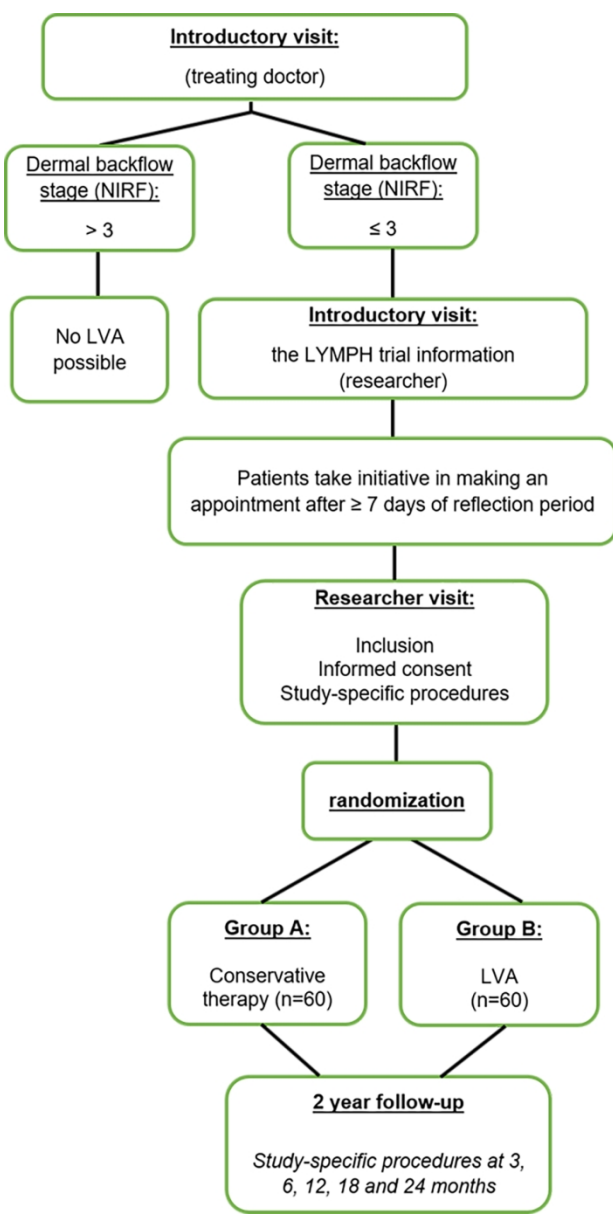

Figure 1 Flowchart: overview of the study design  
97x190mm (300 x 300 DPI)



## Complex Decongestive Therapy (CDT) protocol

The first phase, or initial treatment phase, of CDT entails general skin care, manual lymphatic drainage, exercises aimed at improvement of mobility/range of motion and compression therapy using bandages.

The second phase, or maintenance phase, of CDT is aimed at maintenance of the achieved limb volume reduction through compression therapy with use of therapeutic elastic compression garment for the arm. Skincare, mobility exercises and MLD is continued in this phase if needed.

### First phase

***Three months CDT before randomization (if not yet treated conservatively for  $\geq 3$  months)***

#### Manual lymphatic drainage (MLD)

This is the manual stretching and pressure application to the skin in slow, rhythmic and circular motions to stimulate the activity in the lymphatic vessels to increase lymphatic fluid drainage. The pressure applied is adjusted to the type of edema. The MLD techniques are designed to stimulate lymph flow from distal to proximal lymphatics. The goal of MLD is to re-route the flow of stagnated lymphatic fluid around obstructed or blocked areas into the more centrally located healthy lymphatic vessels. The lymphatic fluid eventually drains into the venous system.

#### *Skin care*

Cleansing of the skin with a pH-neutral product and application of a perfume-free, pH-neutral cream to the skin of the patient.

#### *Pre-treatment of the neck-shoulder region:*

Patient is in supine position: start at supraclavicular lymph nodes in direction of the terminus

- Continue towards the 'm. sternocleidomastoideus', bilaterally;
- Proceed towards axillary lymph nodes (in direction of 'lymfatici centralis, lateralis & subscapularis').

#### *Treatment of the flank:*

- Start at infra-clavicular from sternum distally towards axilla ("anastomosis hold");
- Proceed towards pectoralis muscle to sternum, medial and distally towards axilla;
- Move from breast distally towards flank;
- Followed by the intercostal space, proceed to parasternal space
- Contra-lateral side; start parasternal then intercostal;
- Apply "anastomosis grip" across sternum towards contralateral axilla.

Patient moves from supine position towards flank position with skin therapist seated behind her; position scapula in protraction

- Continue with drainage towards contralateral side;
- Continue from the trans-dorsal anastomosis towards the axilla of the contralateral side.

#### *Treatment of the arm:*

Patient moves back to supine position:

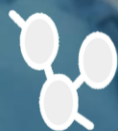

- Drainage of the upper-arm ventrally and dorsally towards supra- and sub-clavicular lymph nodes respectively;
- Continue at 'cubitales profundi' and 'cubitales superficialis';
- Drainage of the underarm, ventral side towards 'cubitales profundi' and dorsally towards 'cubitale superficialis';

#### *Treatment of the hand:*

- Apply "carpal tunnel hold" for hand drainage;
- Dorsal side hand drain towards dorsal side underarm;
- Palmar side hand towards ventral side underarm;
- Fingers and thumb towards dorsal side underarm;

#### *Finish treatment at the neck.*

NB. In case of fibrosis; apply "fibrosis hold"

#### Compression therapy; multi-layered bandaging

- Apply padding on hand, fingers and arm with cotton tricot, synthetic wool (10 cm width) and gauze bandaging (4 cm width). Use a pressure pad in case of edema. Apply tape to fixate padding.
- Apply 6 cm short stretch bandage. Start at wrist, hand, underarm.
- Apply 10 cm short stretch bandage. Start at wrist towards proximal, bandage clockwise.
- Apply 10 cm short stretch bandage. Start at wrist towards proximal, bandage anti-clockwise.
- Bandage is only removed during the next treatment session by skin therapist.

#### *Frequency and duration of conservative treatment during the first 3 months:*

- CDT phase 1.1: will continue for 6 weeks, 3 times a week, during 45 minutes (30 minutes MLD and 15 minutes of skincare, compression therapy and exercises).
- CDT phase 1.2: measure arms for therapeutic elastic compression garment (pressure class 2). In addition continue complex decongestive therapy as in phase 1: two times a week in week 7 and 8, once a week from week 9 till 12.

## **Second phase**

### After randomization

After randomization, or if participants already had CDT as described in phase 1, phase 2 applies. CDT will be continued at least once a month during the rest of the study period. CDT is chronic care for this chronic disease which most of the time is necessary an entire lifetime, therefore the start of follow-up and ending of the treatment is unclear.

### Manual lymphatic drainage (MLD)

MLD continues or starts as described in phase 1.

### Compression therapy:

At least pressure class 2 elastic compression garment for the arm. A separate glove may be used as complement. Two garment are recommended for hygienic reasons and preserve elasticity of the garment.



SPIRIT 2013 Checklist: Recommended items to address in a clinical trial protocol and related documents\*

| Section/item                      | Item No | Description                                                                                                                                                                                                                                                                              | Addressed on page number |
|-----------------------------------|---------|------------------------------------------------------------------------------------------------------------------------------------------------------------------------------------------------------------------------------------------------------------------------------------------|--------------------------|
| <b>Administrative information</b> |         |                                                                                                                                                                                                                                                                                          |                          |
| Title                             | 1       | Descriptive title identifying the study design, population, interventions, and, if applicable, trial acronym                                                                                                                                                                             | 1                        |
| Trial registration                | 2a      | Trial identifier and registry name. If not yet registered, name of intended registry                                                                                                                                                                                                     | 3, 16                    |
|                                   | 2b      | All items from the World Health Organization Trial Registration Data Set                                                                                                                                                                                                                 | yes                      |
| Protocol version                  | 3       | Date and version identifier                                                                                                                                                                                                                                                              | V4, 15-04-2019           |
| Funding                           | 4       | Sources and types of financial, material, and other support                                                                                                                                                                                                                              | 22                       |
| Roles and responsibilities        | 5a      | Names, affiliations, and roles of protocol contributors                                                                                                                                                                                                                                  | 1, 21                    |
|                                   | 5b      | Name and contact information for the trial sponsor                                                                                                                                                                                                                                       | 22                       |
|                                   | 5c      | Role of study sponsor and funders, if any, in study design; collection, management, analysis, and interpretation of data; writing of the report; and the decision to submit the report for publication, including whether they will have ultimate authority over any of these activities | NA                       |
|                                   | 5d      | Composition, roles, and responsibilities of the coordinating centre, steering committee, endpoint adjudication committee, data management team, and other individuals or groups overseeing the trial, if applicable (see Item 21a for data monitoring committee)                         | NA                       |

|    |                                                           |     |                                                                                                               |          |
|----|-----------------------------------------------------------|-----|---------------------------------------------------------------------------------------------------------------|----------|
| 1  | <b>Introduction</b>                                       |     |                                                                                                               |          |
| 2  |                                                           |     |                                                                                                               |          |
| 3  | Background and                                            | 6a  | Description of research question and justification for undertaking the trial, including summary of relevant   | 4-6      |
| 4  | rationale                                                 |     | studies (published and unpublished) examining benefits and harms for each intervention                        |          |
| 5  |                                                           |     |                                                                                                               |          |
| 6  |                                                           | 6b  | Explanation for choice of comparators                                                                         | 4-6      |
| 7  |                                                           |     |                                                                                                               |          |
| 8  | Objectives                                                | 7   | Specific objectives or hypotheses                                                                             | 6        |
| 9  |                                                           |     |                                                                                                               |          |
| 10 | Trial design                                              | 8   | Description of trial design including type of trial (eg, parallel group, crossover, factorial, single group), |          |
| 11 |                                                           |     | allocation ratio, and framework (eg, superiority, equivalence, noninferiority, exploratory)                   | 6        |
| 12 |                                                           |     |                                                                                                               |          |
| 13 |                                                           |     |                                                                                                               |          |
| 14 | <b>Methods: Participants, interventions, and outcomes</b> |     |                                                                                                               |          |
| 15 |                                                           |     |                                                                                                               |          |
| 16 | Study setting                                             | 9   | Description of study settings (eg, community clinic, academic hospital) and list of countries where data will | 6        |
| 17 |                                                           |     | be collected. Reference to where list of study sites can be obtained                                          |          |
| 18 |                                                           |     |                                                                                                               |          |
| 19 | Eligibility criteria                                      | 10  | Inclusion and exclusion criteria for participants. If applicable, eligibility criteria for study centres and  | 7        |
| 20 |                                                           |     | individuals who will perform the interventions (eg, surgeons, psychotherapists)                               |          |
| 21 |                                                           |     |                                                                                                               |          |
| 22 | Interventions                                             | 11a | Interventions for each group with sufficient detail to allow replication, including how and when they will be | 7-9      |
| 23 |                                                           |     | administered                                                                                                  |          |
| 24 |                                                           |     |                                                                                                               |          |
| 25 |                                                           | 11b | Criteria for discontinuing or modifying allocated interventions for a given trial participant (eg, drug dose  | NA       |
| 26 |                                                           |     | change in response to harms, participant request, or improving/worsening disease)                             |          |
| 27 |                                                           |     |                                                                                                               |          |
| 28 |                                                           | 11c | Strategies to improve adherence to intervention protocols, and any procedures for monitoring adherence        | NA       |
| 29 |                                                           |     | (eg, drug tablet return, laboratory tests)                                                                    |          |
| 30 |                                                           |     |                                                                                                               |          |
| 31 |                                                           | 11d | Relevant concomitant care and interventions that are permitted or prohibited during the trial                 | NA       |
| 32 |                                                           |     |                                                                                                               |          |
| 33 |                                                           |     |                                                                                                               |          |
| 34 | Outcomes                                                  | 12  | Primary, secondary, and other outcomes, including the specific measurement variable (eg, systolic blood       |          |
| 35 |                                                           |     | pressure), analysis metric (eg, change from baseline, final value, time to event), method of aggregation (eg, | 10-13    |
| 36 |                                                           |     | median, proportion), and time point for each outcome. Explanation of the clinical relevance of chosen         |          |
| 37 |                                                           |     | efficacy and harm outcomes is strongly recommended                                                            |          |
| 38 |                                                           |     |                                                                                                               |          |
| 39 |                                                           |     |                                                                                                               |          |
| 40 | Participant timeline                                      | 13  | Time schedule of enrolment, interventions (including any run-ins and washouts), assessments, and visits for   | 6, Fig 1 |
| 41 |                                                           |     | participants. A schematic diagram is highly recommended (see Figure)                                          |          |
| 42 |                                                           |     |                                                                                                               |          |
| 43 |                                                           |     |                                                                                                               |          |
| 44 |                                                           |     |                                                                                                               |          |
| 45 |                                                           |     |                                                                                                               |          |
| 46 |                                                           |     |                                                                                                               |          |

|   |             |    |                                                                                                                                                                                       |       |
|---|-------------|----|---------------------------------------------------------------------------------------------------------------------------------------------------------------------------------------|-------|
| 1 | Sample size | 14 | Estimated number of participants needed to achieve study objectives and how it was determined, including clinical and statistical assumptions supporting any sample size calculations | 9, 10 |
| 2 |             |    |                                                                                                                                                                                       |       |
| 3 |             |    |                                                                                                                                                                                       |       |
| 4 | Recruitment | 15 | Strategies for achieving adequate participant enrolment to reach target sample size                                                                                                   | 6     |
| 5 |             |    |                                                                                                                                                                                       |       |

### 6 **Methods: Assignment of interventions (for controlled trials)**

#### 7 Allocation:

|    |                                  |     |                                                                                                                                                                                                                                                                                                                                                          |          |
|----|----------------------------------|-----|----------------------------------------------------------------------------------------------------------------------------------------------------------------------------------------------------------------------------------------------------------------------------------------------------------------------------------------------------------|----------|
| 10 | Sequence generation              | 16a | Method of generating the allocation sequence (eg, computer-generated random numbers), and list of any factors for stratification. To reduce predictability of a random sequence, details of any planned restriction (eg, blocking) should be provided in a separate document that is unavailable to those who enrol participants or assign interventions | 6        |
| 11 |                                  |     |                                                                                                                                                                                                                                                                                                                                                          |          |
| 12 |                                  |     |                                                                                                                                                                                                                                                                                                                                                          |          |
| 13 |                                  |     |                                                                                                                                                                                                                                                                                                                                                          |          |
| 14 |                                  |     |                                                                                                                                                                                                                                                                                                                                                          |          |
| 15 |                                  |     |                                                                                                                                                                                                                                                                                                                                                          |          |
| 16 | Allocation concealment mechanism | 16b | Mechanism of implementing the allocation sequence (eg, central telephone; sequentially numbered, opaque, sealed envelopes), describing any steps to conceal the sequence until interventions are assigned                                                                                                                                                | 6        |
| 17 |                                  |     |                                                                                                                                                                                                                                                                                                                                                          |          |
| 18 |                                  |     |                                                                                                                                                                                                                                                                                                                                                          |          |
| 19 |                                  |     |                                                                                                                                                                                                                                                                                                                                                          |          |
| 20 |                                  |     |                                                                                                                                                                                                                                                                                                                                                          |          |
| 21 | Implementation                   | 16c | Who will generate the allocation sequence, who will enrol participants, and who will assign participants to interventions                                                                                                                                                                                                                                | 6, Fig 1 |
| 22 |                                  |     |                                                                                                                                                                                                                                                                                                                                                          |          |
| 23 |                                  |     |                                                                                                                                                                                                                                                                                                                                                          |          |
| 24 | Blinding (masking)               | 17a | Who will be blinded after assignment to interventions (eg, trial participants, care providers, outcome assessors, data analysts), and how                                                                                                                                                                                                                | NA       |
| 25 |                                  |     |                                                                                                                                                                                                                                                                                                                                                          |          |
| 26 |                                  |     |                                                                                                                                                                                                                                                                                                                                                          |          |
| 27 |                                  | 17b | If blinded, circumstances under which unblinding is permissible, and procedure for revealing a participant's allocated intervention during the trial                                                                                                                                                                                                     | NA       |
| 28 |                                  |     |                                                                                                                                                                                                                                                                                                                                                          |          |
| 29 |                                  |     |                                                                                                                                                                                                                                                                                                                                                          |          |
| 30 |                                  |     |                                                                                                                                                                                                                                                                                                                                                          |          |

### 31 **Methods: Data collection, management, and analysis**

|    |                         |     |                                                                                                                                                                                                                                                                                                                                                                                                              |       |
|----|-------------------------|-----|--------------------------------------------------------------------------------------------------------------------------------------------------------------------------------------------------------------------------------------------------------------------------------------------------------------------------------------------------------------------------------------------------------------|-------|
| 33 | Data collection methods | 18a | Plans for assessment and collection of outcome, baseline, and other trial data, including any related processes to promote data quality (eg, duplicate measurements, training of assessors) and a description of study instruments (eg, questionnaires, laboratory tests) along with their reliability and validity, if known. Reference to where data collection forms can be found, if not in the protocol | 10-14 |
| 34 |                         |     |                                                                                                                                                                                                                                                                                                                                                                                                              |       |
| 35 |                         |     |                                                                                                                                                                                                                                                                                                                                                                                                              |       |
| 36 |                         |     |                                                                                                                                                                                                                                                                                                                                                                                                              |       |
| 37 |                         |     |                                                                                                                                                                                                                                                                                                                                                                                                              |       |
| 38 |                         |     |                                                                                                                                                                                                                                                                                                                                                                                                              |       |
| 39 |                         | 18b | Plans to promote participant retention and complete follow-up, including list of any outcome data to be collected for participants who discontinue or deviate from intervention protocols                                                                                                                                                                                                                    | 3     |
| 40 |                         |     |                                                                                                                                                                                                                                                                                                                                                                                                              |       |
| 41 |                         |     |                                                                                                                                                                                                                                                                                                                                                                                                              |       |
| 42 |                         |     |                                                                                                                                                                                                                                                                                                                                                                                                              |       |

|    |                                 |     |                                                                                                                                                                                                                                                                                                                                       |        |
|----|---------------------------------|-----|---------------------------------------------------------------------------------------------------------------------------------------------------------------------------------------------------------------------------------------------------------------------------------------------------------------------------------------|--------|
| 1  | Data management                 | 19  | Plans for data entry, coding, security, and storage, including any related processes to promote data quality (eg, double data entry; range checks for data values). Reference to where details of data management procedures can be found, if not in the protocol                                                                     | 14, 15 |
| 2  |                                 |     |                                                                                                                                                                                                                                                                                                                                       |        |
| 3  |                                 |     |                                                                                                                                                                                                                                                                                                                                       |        |
| 4  |                                 |     |                                                                                                                                                                                                                                                                                                                                       |        |
| 5  | Statistical methods             | 20a | Statistical methods for analysing primary and secondary outcomes. Reference to where other details of the statistical analysis plan can be found, if not in the protocol                                                                                                                                                              | 13, 14 |
| 6  |                                 |     |                                                                                                                                                                                                                                                                                                                                       |        |
| 7  |                                 |     |                                                                                                                                                                                                                                                                                                                                       |        |
| 8  |                                 | 20b | Methods for any additional analyses (eg, subgroup and adjusted analyses)                                                                                                                                                                                                                                                              | 13, 14 |
| 9  |                                 |     |                                                                                                                                                                                                                                                                                                                                       |        |
| 10 |                                 | 20c | Definition of analysis population relating to protocol non-adherence (eg, as randomised analysis), and any statistical methods to handle missing data (eg, multiple imputation)                                                                                                                                                       | 14     |
| 11 |                                 |     |                                                                                                                                                                                                                                                                                                                                       |        |
| 12 |                                 |     |                                                                                                                                                                                                                                                                                                                                       |        |
| 13 |                                 |     |                                                                                                                                                                                                                                                                                                                                       |        |
| 14 | <b>Methods: Monitoring</b>      |     |                                                                                                                                                                                                                                                                                                                                       |        |
| 15 |                                 |     |                                                                                                                                                                                                                                                                                                                                       |        |
| 16 | Data monitoring                 | 21a | Composition of data monitoring committee (DMC); summary of its role and reporting structure; statement of whether it is independent from the sponsor and competing interests; and reference to where further details about its charter can be found, if not in the protocol. Alternatively, an explanation of why a DMC is not needed | 15     |
| 17 |                                 |     |                                                                                                                                                                                                                                                                                                                                       |        |
| 18 |                                 |     |                                                                                                                                                                                                                                                                                                                                       |        |
| 19 |                                 |     |                                                                                                                                                                                                                                                                                                                                       |        |
| 20 |                                 |     |                                                                                                                                                                                                                                                                                                                                       |        |
| 21 |                                 |     |                                                                                                                                                                                                                                                                                                                                       |        |
| 22 |                                 | 21b | Description of any interim analyses and stopping guidelines, including who will have access to these interim results and make the final decision to terminate the trial                                                                                                                                                               | NA     |
| 23 |                                 |     |                                                                                                                                                                                                                                                                                                                                       |        |
| 24 |                                 |     |                                                                                                                                                                                                                                                                                                                                       |        |
| 25 | Harms                           | 22  | Plans for collecting, assessing, reporting, and managing solicited and spontaneously reported adverse events and other unintended effects of trial interventions or trial conduct                                                                                                                                                     | 15     |
| 26 |                                 |     |                                                                                                                                                                                                                                                                                                                                       |        |
| 27 |                                 |     |                                                                                                                                                                                                                                                                                                                                       |        |
| 28 | Auditing                        | 23  | Frequency and procedures for auditing trial conduct, if any, and whether the process will be independent from investigators and the sponsor                                                                                                                                                                                           | 15     |
| 29 |                                 |     |                                                                                                                                                                                                                                                                                                                                       |        |
| 30 |                                 |     |                                                                                                                                                                                                                                                                                                                                       |        |
| 31 |                                 |     |                                                                                                                                                                                                                                                                                                                                       |        |
| 32 | <b>Ethics and dissemination</b> |     |                                                                                                                                                                                                                                                                                                                                       |        |
| 33 |                                 |     |                                                                                                                                                                                                                                                                                                                                       |        |
| 34 | Research ethics approval        | 24  | Plans for seeking research ethics committee/institutional review board (REC/IRB) approval                                                                                                                                                                                                                                             | 2, 15  |
| 35 |                                 |     |                                                                                                                                                                                                                                                                                                                                       |        |
| 36 |                                 |     |                                                                                                                                                                                                                                                                                                                                       |        |
| 37 | Protocol amendments             | 25  | Plans for communicating important protocol modifications (eg, changes to eligibility criteria, outcomes, analyses) to relevant parties (eg, investigators, REC/IRBs, trial participants, trial registries, journals, regulators)                                                                                                      | 15     |
| 38 |                                 |     |                                                                                                                                                                                                                                                                                                                                       |        |
| 39 |                                 |     |                                                                                                                                                                                                                                                                                                                                       |        |
| 40 |                                 |     |                                                                                                                                                                                                                                                                                                                                       |        |
| 41 |                                 |     |                                                                                                                                                                                                                                                                                                                                       |        |
| 42 |                                 |     |                                                                                                                                                                                                                                                                                                                                       |        |

|    |                               |     |                                                                                                                                                                                                                                                                                     |                                                                                 |
|----|-------------------------------|-----|-------------------------------------------------------------------------------------------------------------------------------------------------------------------------------------------------------------------------------------------------------------------------------------|---------------------------------------------------------------------------------|
| 1  | Consent or assent             | 26a | Who will obtain informed consent or assent from potential trial participants or authorised surrogates, and how (see Item 32)                                                                                                                                                        | 22, Fig 1                                                                       |
| 2  |                               |     |                                                                                                                                                                                                                                                                                     |                                                                                 |
| 3  |                               |     |                                                                                                                                                                                                                                                                                     |                                                                                 |
| 4  |                               | 26b | Additional consent provisions for collection and use of participant data and biological specimens in ancillary studies, if applicable                                                                                                                                               | NA                                                                              |
| 5  |                               |     |                                                                                                                                                                                                                                                                                     |                                                                                 |
| 6  |                               |     |                                                                                                                                                                                                                                                                                     |                                                                                 |
| 7  | Confidentiality               | 27  | How personal information about potential and enrolled participants will be collected, shared, and maintained in order to protect confidentiality before, during, and after the trial                                                                                                | 14                                                                              |
| 8  |                               |     |                                                                                                                                                                                                                                                                                     |                                                                                 |
| 9  |                               |     |                                                                                                                                                                                                                                                                                     |                                                                                 |
| 10 | Declaration of interests      | 28  | Financial and other competing interests for principal investigators for the overall trial and each study site                                                                                                                                                                       | 22                                                                              |
| 11 |                               |     |                                                                                                                                                                                                                                                                                     |                                                                                 |
| 12 |                               |     |                                                                                                                                                                                                                                                                                     |                                                                                 |
| 13 | Access to data                | 29  | Statement of who will have access to the final trial dataset, and disclosure of contractual agreements that limit such access for investigators                                                                                                                                     | Contractual agreement is present                                                |
| 14 |                               |     |                                                                                                                                                                                                                                                                                     |                                                                                 |
| 15 |                               |     |                                                                                                                                                                                                                                                                                     |                                                                                 |
| 16 |                               |     |                                                                                                                                                                                                                                                                                     |                                                                                 |
| 17 |                               |     |                                                                                                                                                                                                                                                                                     |                                                                                 |
| 18 | Ancillary and post-trial care | 30  | Provisions, if any, for ancillary and post-trial care, and for compensation to those who suffer harm from trial participation                                                                                                                                                       | Insurance is included in case of harm                                           |
| 19 |                               |     |                                                                                                                                                                                                                                                                                     |                                                                                 |
| 20 |                               |     |                                                                                                                                                                                                                                                                                     |                                                                                 |
| 21 |                               |     |                                                                                                                                                                                                                                                                                     |                                                                                 |
| 22 | Dissemination policy          | 31a | Plans for investigators and sponsor to communicate trial results to participants, healthcare professionals, the public, and other relevant groups (eg, via publication, reporting in results databases, or other data sharing arrangements), including any publication restrictions | 16                                                                              |
| 23 |                               |     |                                                                                                                                                                                                                                                                                     |                                                                                 |
| 24 |                               |     |                                                                                                                                                                                                                                                                                     |                                                                                 |
| 25 |                               |     |                                                                                                                                                                                                                                                                                     |                                                                                 |
| 26 |                               |     |                                                                                                                                                                                                                                                                                     |                                                                                 |
| 27 |                               | 31b | Authorship eligibility guidelines and any intended use of professional writers                                                                                                                                                                                                      | NA                                                                              |
| 28 |                               |     |                                                                                                                                                                                                                                                                                     |                                                                                 |
| 29 |                               | 31c | Plans, if any, for granting public access to the full protocol, participant-level dataset, and statistical code                                                                                                                                                                     | NA                                                                              |
| 30 |                               |     |                                                                                                                                                                                                                                                                                     |                                                                                 |
| 31 | <b>Appendices</b>             |     |                                                                                                                                                                                                                                                                                     |                                                                                 |
| 32 |                               |     |                                                                                                                                                                                                                                                                                     |                                                                                 |
| 33 | Informed consent materials    | 32  | Model consent form and other related documentation given to participants and authorised surrogates                                                                                                                                                                                  | Model provided by Central Committee on Research Involving Human Subjects (CCMO) |
| 34 |                               |     |                                                                                                                                                                                                                                                                                     |                                                                                 |
| 35 |                               |     |                                                                                                                                                                                                                                                                                     |                                                                                 |
| 36 |                               |     |                                                                                                                                                                                                                                                                                     |                                                                                 |
| 37 |                               |     |                                                                                                                                                                                                                                                                                     |                                                                                 |
| 38 |                               |     |                                                                                                                                                                                                                                                                                     |                                                                                 |
| 39 |                               |     |                                                                                                                                                                                                                                                                                     |                                                                                 |
| 40 |                               |     |                                                                                                                                                                                                                                                                                     |                                                                                 |
| 41 |                               |     |                                                                                                                                                                                                                                                                                     |                                                                                 |
| 42 |                               |     |                                                                                                                                                                                                                                                                                     |                                                                                 |
| 43 |                               |     |                                                                                                                                                                                                                                                                                     |                                                                                 |
| 44 |                               |     |                                                                                                                                                                                                                                                                                     |                                                                                 |
| 45 |                               |     |                                                                                                                                                                                                                                                                                     |                                                                                 |
| 46 |                               |     |                                                                                                                                                                                                                                                                                     |                                                                                 |

|   |            |    |                                                                                                           |    |
|---|------------|----|-----------------------------------------------------------------------------------------------------------|----|
| 1 | Biological | 33 | Plans for collection, laboratory evaluation, and storage of biological specimens for genetic or molecular | NA |
| 2 | specimens  |    | analysis in the current trial and for future use in ancillary studies, if applicable                      |    |

---

4 \*It is strongly recommended that this checklist be read in conjunction with the SPIRIT 2013 Explanation & Elaboration for important clarification on the items.  
5 Amendments to the protocol should be tracked and dated. The SPIRIT checklist is copyrighted by the SPIRIT Group under the Creative Commons  
6 [“Attribution-NonCommercial-NoDerivs 3.0 Unported”](#) license.  
7

For peer review only

8  
9  
10  
11  
12  
13  
14  
15  
16  
17  
18  
19  
20  
21  
22  
23  
24  
25  
26  
27  
28  
29  
30  
31  
32  
33  
34  
35  
36  
37  
38  
39  
40  
41  
42  
43  
44  
45  
46
